# Supplementary material for: peri-Interactions in 1,8-bis(dimethylamino)naphthalene ortho-ketimine cations facilitate [1,5]-hydride shift: selective synthesis of 1,2,3,4-tetrahydrobenzo[h]quinazolines
Source: Royal Society of Chemistry journal article supplement (doi:10.1039/d2ob00674j), 2022-01-01
Supplement: d2ob00674j1.pdf [file d2ob00674j1.pdf]

# Supporting Information

## ***peri*-Interactions in 1,8-bis(dimethylamino)naphthalene *ortho*-ketimine cations facilitate [1,5]-hydride shift: selective synthesis of 1,2,3,4-tetrahydrobenzo[h]quinazolines**

Vladimir Y. Mikshiev\*, Peter M. Tolstoy, Aleksandra M. Puzyk, Sergey O. Kirichenko and  
Alexander S. Antonov\*.

Institute of Chemistry, St. Petersburg State University, Universitetskij pr. 26, 198504 St. Petersburg,  
Russian Federation

E-mail: vladimirmikshiev@mail.ru

## Table of Contents

|                                                                                           |    |
|-------------------------------------------------------------------------------------------|----|
| NMR spectra of reaction mixtures.....                                                     | 3  |
| NMR spectra of protonated 1,8-bis(dimethylamino)naphthalene <i>ortho</i> -ketimines ..... | 11 |
| Compounds NMR spectra.....                                                                | 18 |
| X-Ray data.....                                                                           | 54 |
| Computational data.....                                                                   | 56 |
| Cartesian coordinates and total energies.....                                             | 58 |
| References.....                                                                           | 72 |

## NMR spectra of reaction mixtures

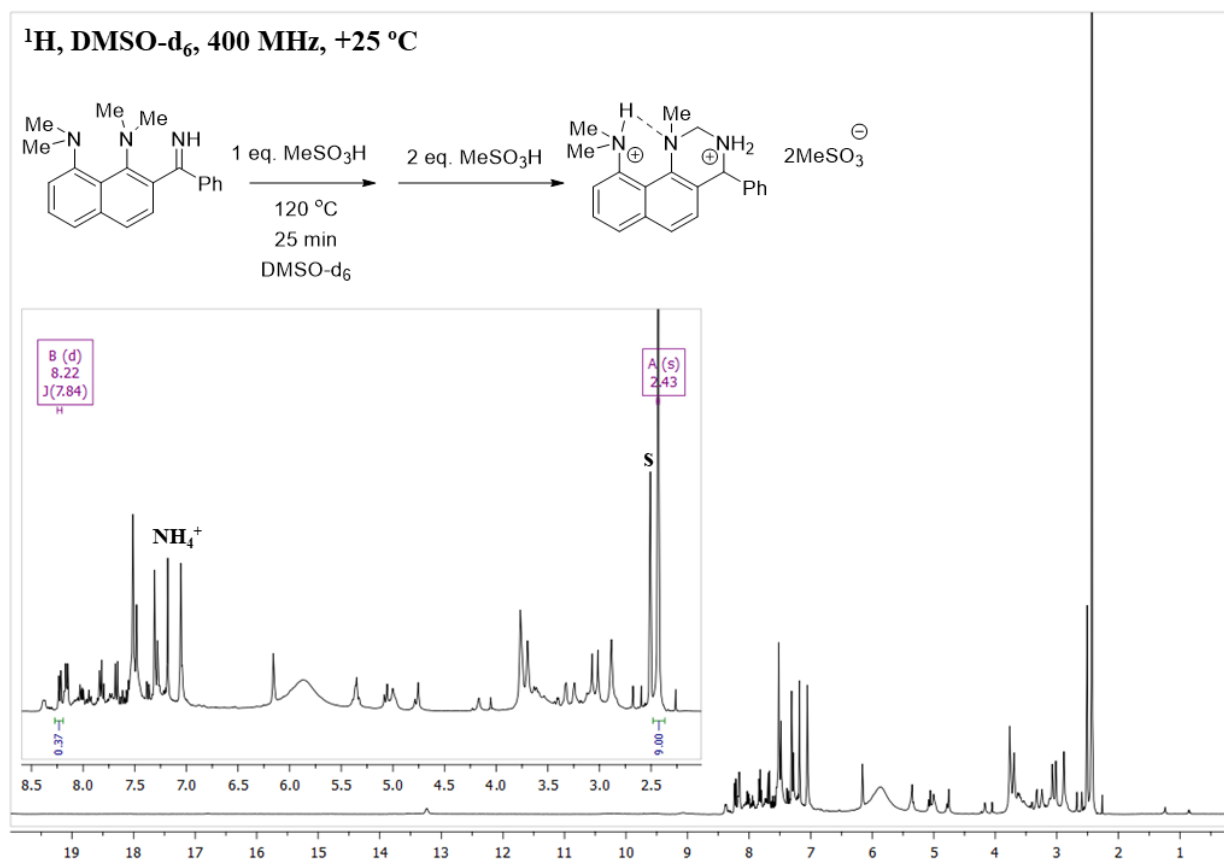

Figure S1.  $^1\text{H}$  NMR spectrum of the reaction mixture for entry 1 (table 1).

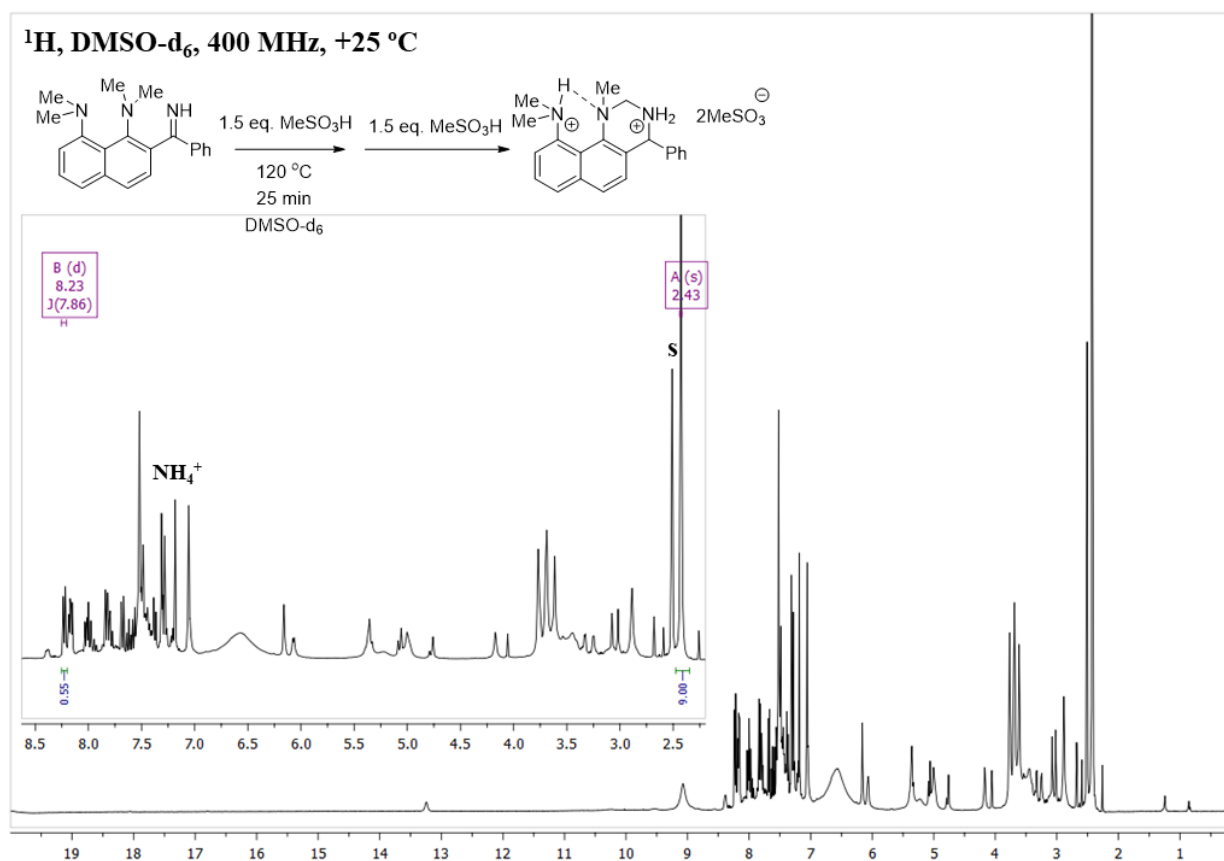

Figure S2.  $^1\text{H}$  NMR spectrum of the reaction mixture for entry 2 (table 1).

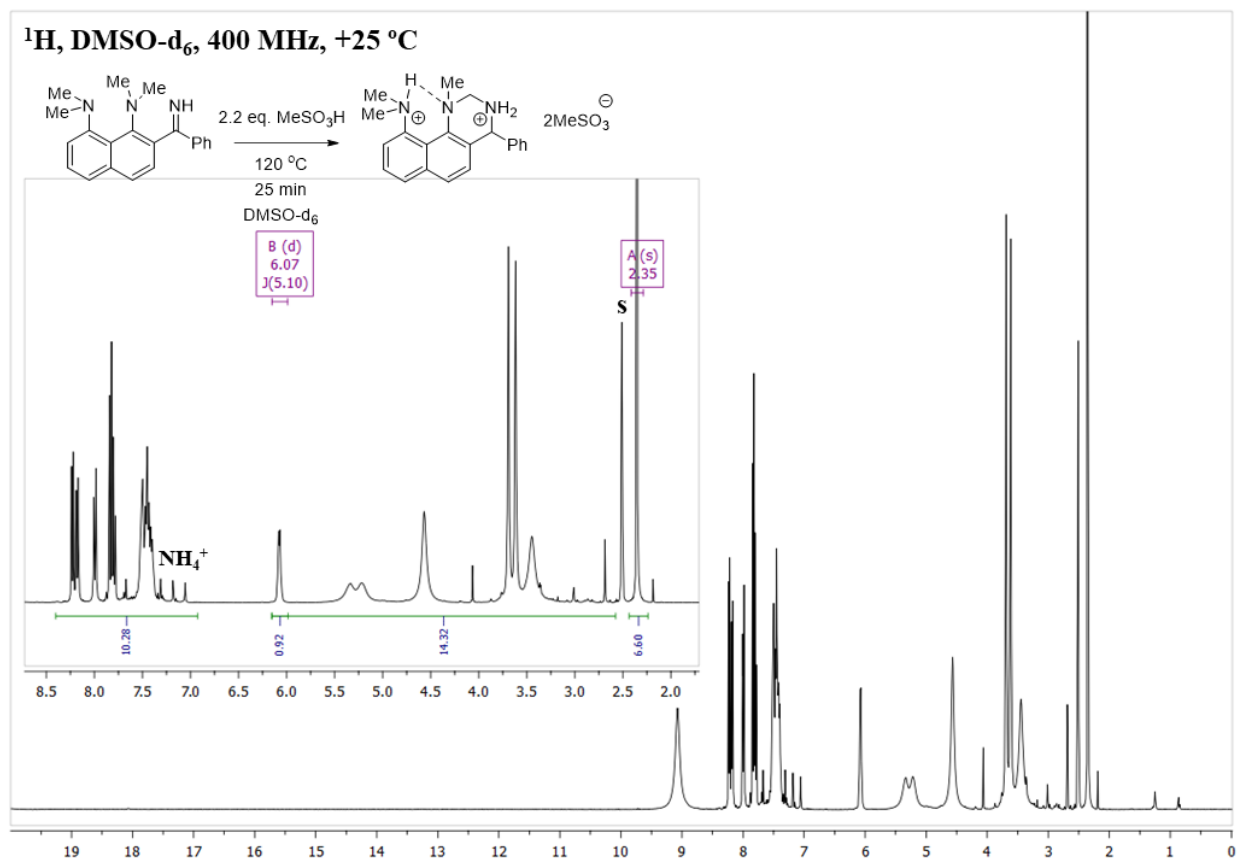

**Figure S3.**  $^1\text{H}$  NMR spectrum of the reaction mixture for entry 3 (table 1).

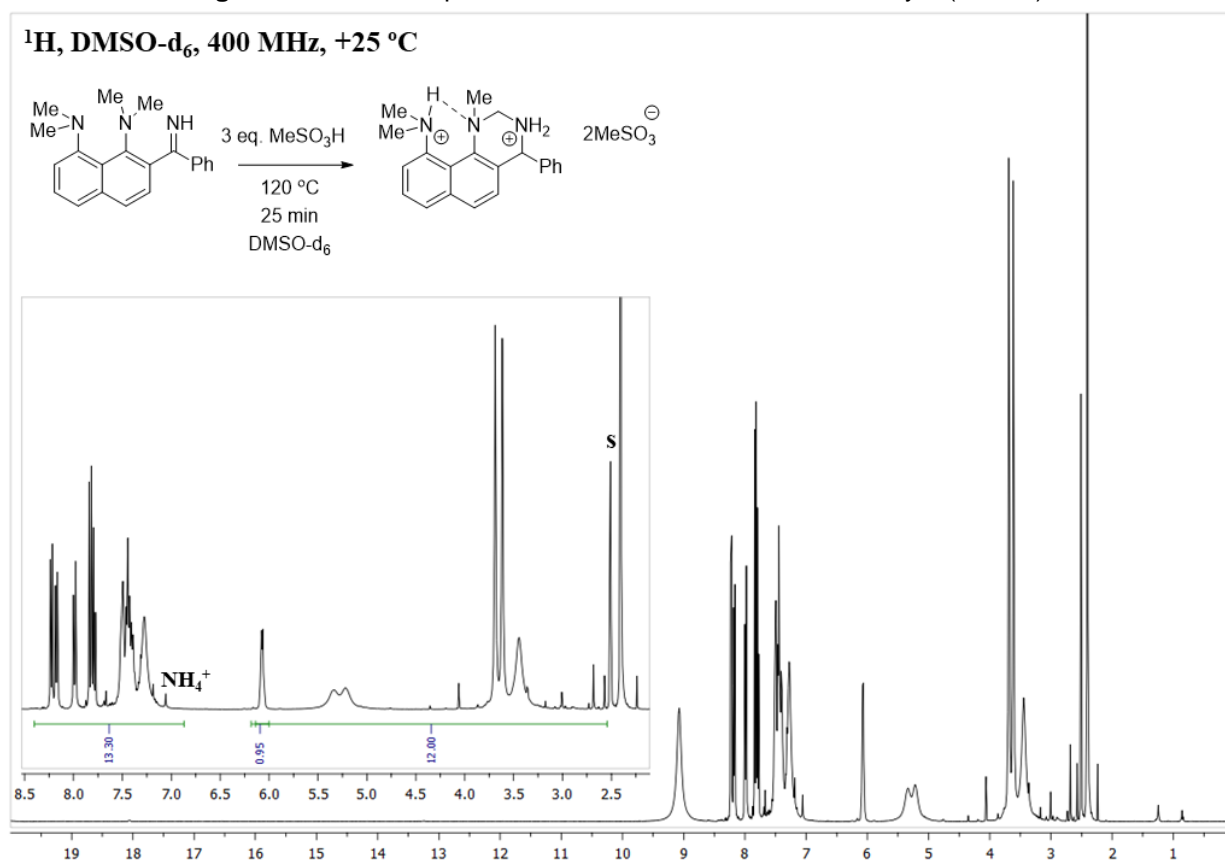

**Figure S4.**  $^1\text{H}$  NMR spectrum of the reaction mixture for entry 4 (table 1).

$^1\text{H}$ , DMSO- $d_6$ , 400 MHz, +25 °C

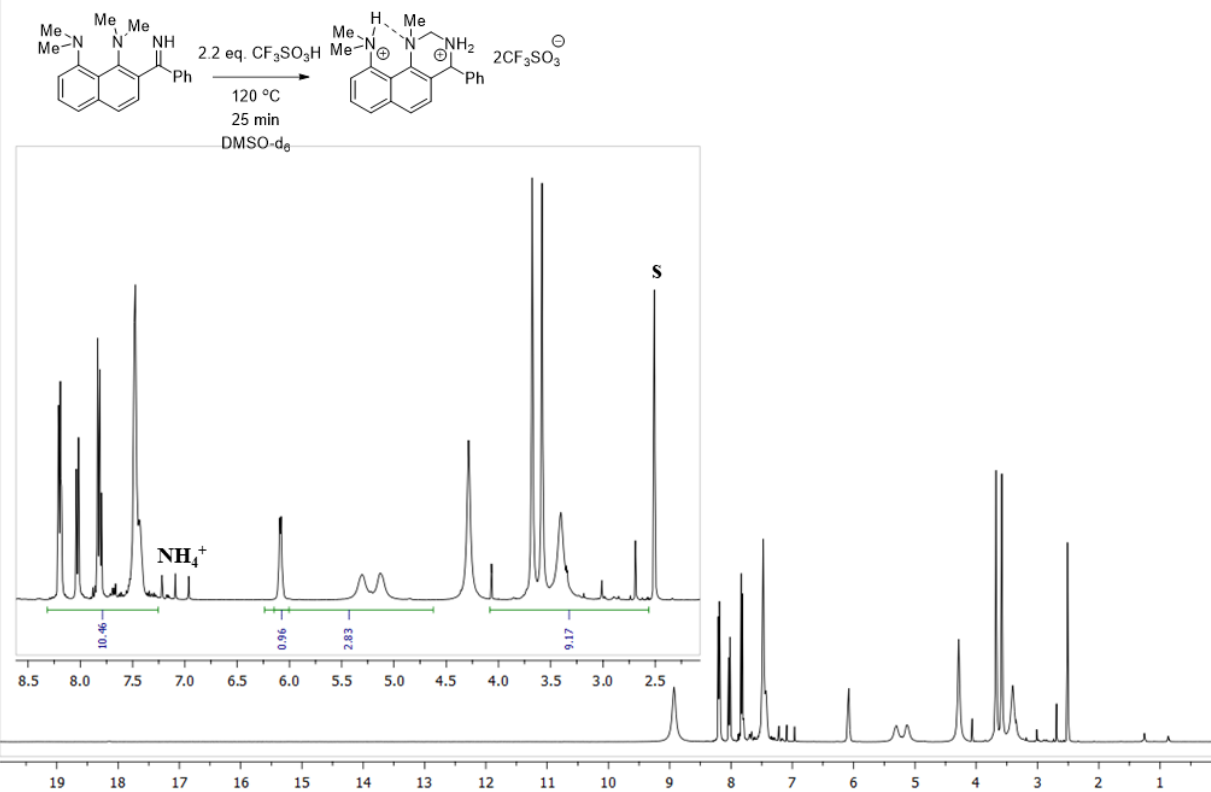

Figure S5.  $^1\text{H}$  NMR spectrum of the reaction mixture for entry 5 (table 1).

$^1\text{H}$ , DMSO- $d_6$ , 400 MHz, +25 °C

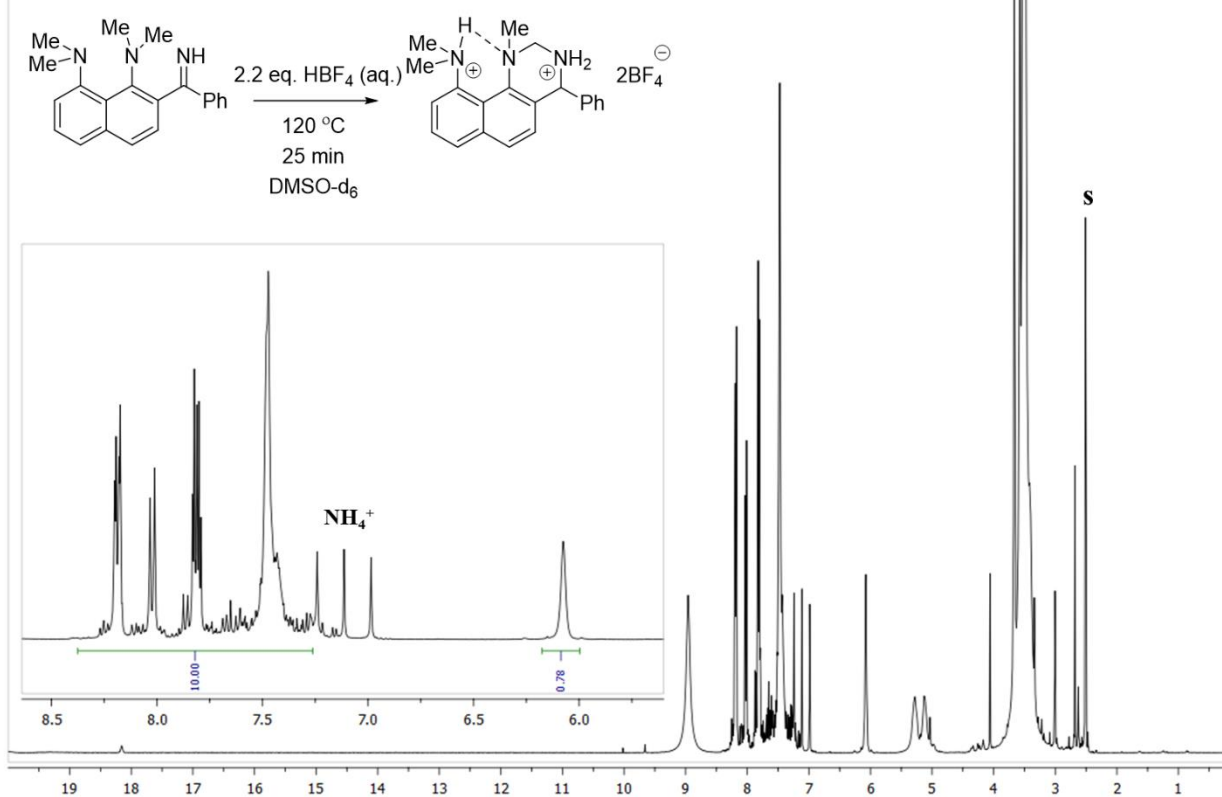

Figure S6.  $^1\text{H}$  NMR spectrum of the reaction mixture for entry 6 (table 1).

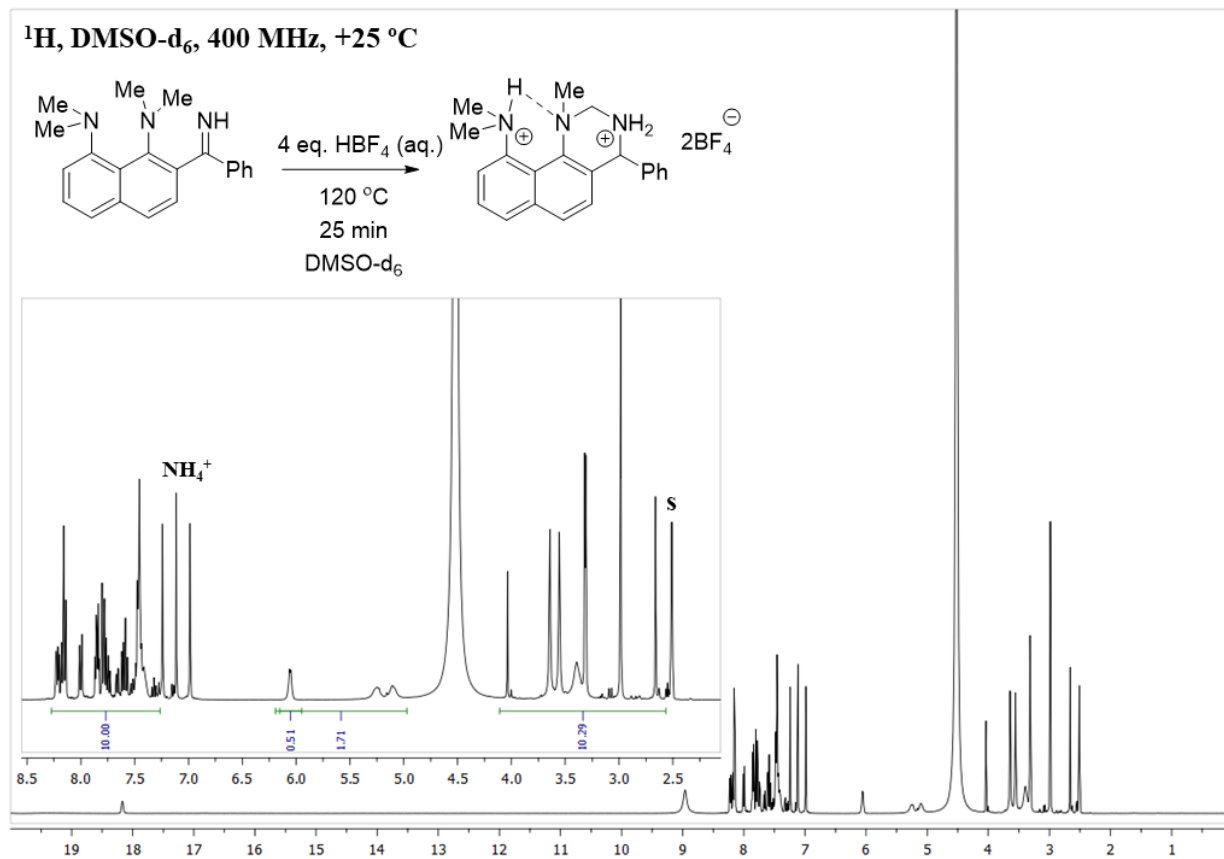

**Figure S7.**  $^1\text{H}$  NMR spectrum of the reaction mixture for entry 7 (table 1).

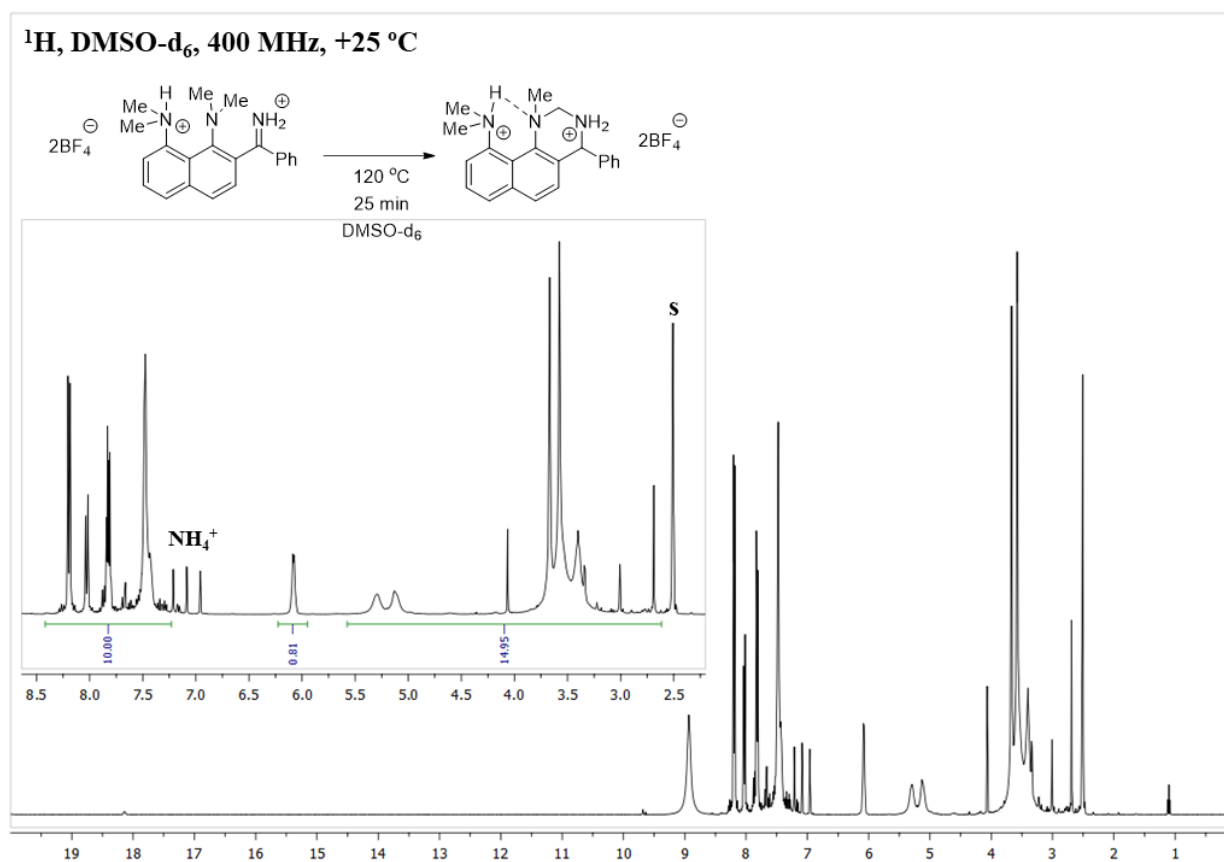

**Figure S8.**  $^1\text{H}$  NMR spectrum of the reaction mixture for entry 8 (table 1).

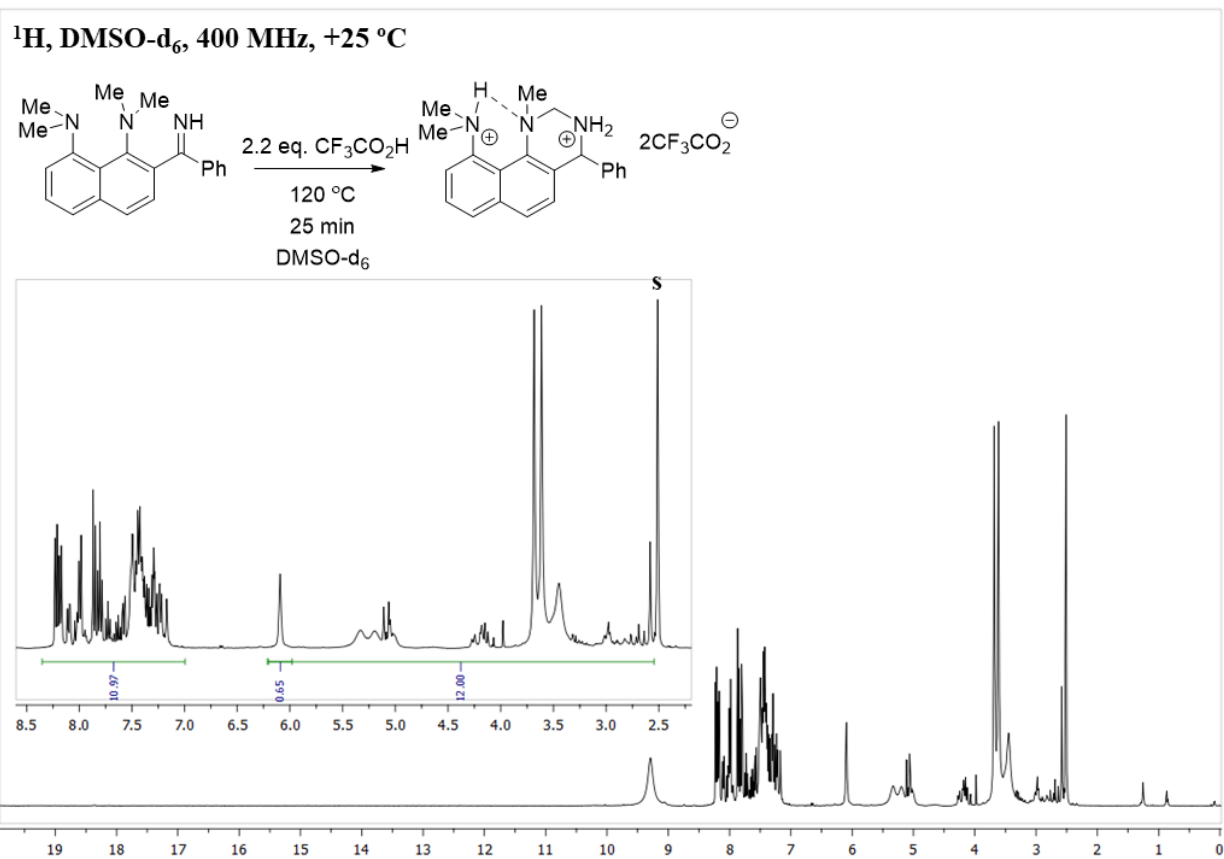

**Figure S.**  $^1\text{H}$  NMR spectrum of the reaction mixture for entry 9 (table 1).

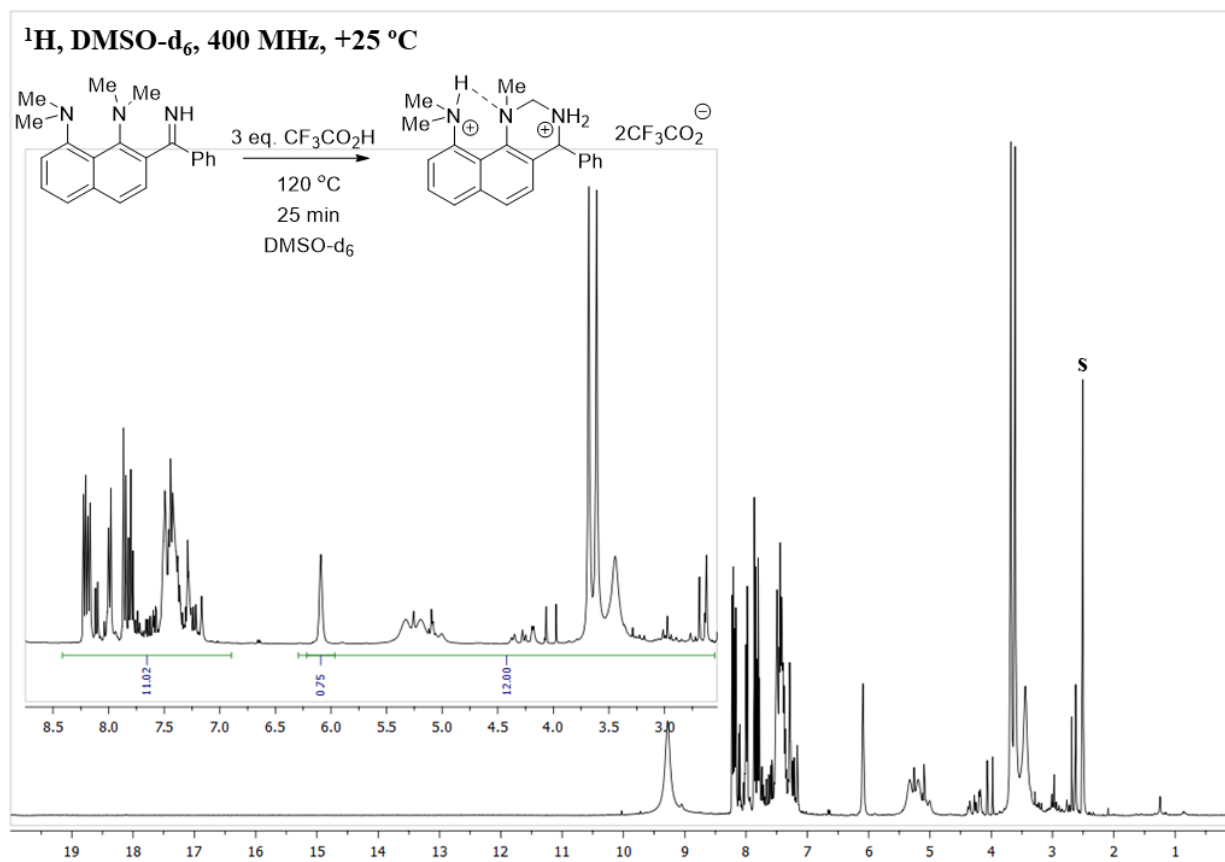

**Figure S10.**  $^1\text{H}$  NMR spectrum of the reaction mixture for entry 10 (table 1).

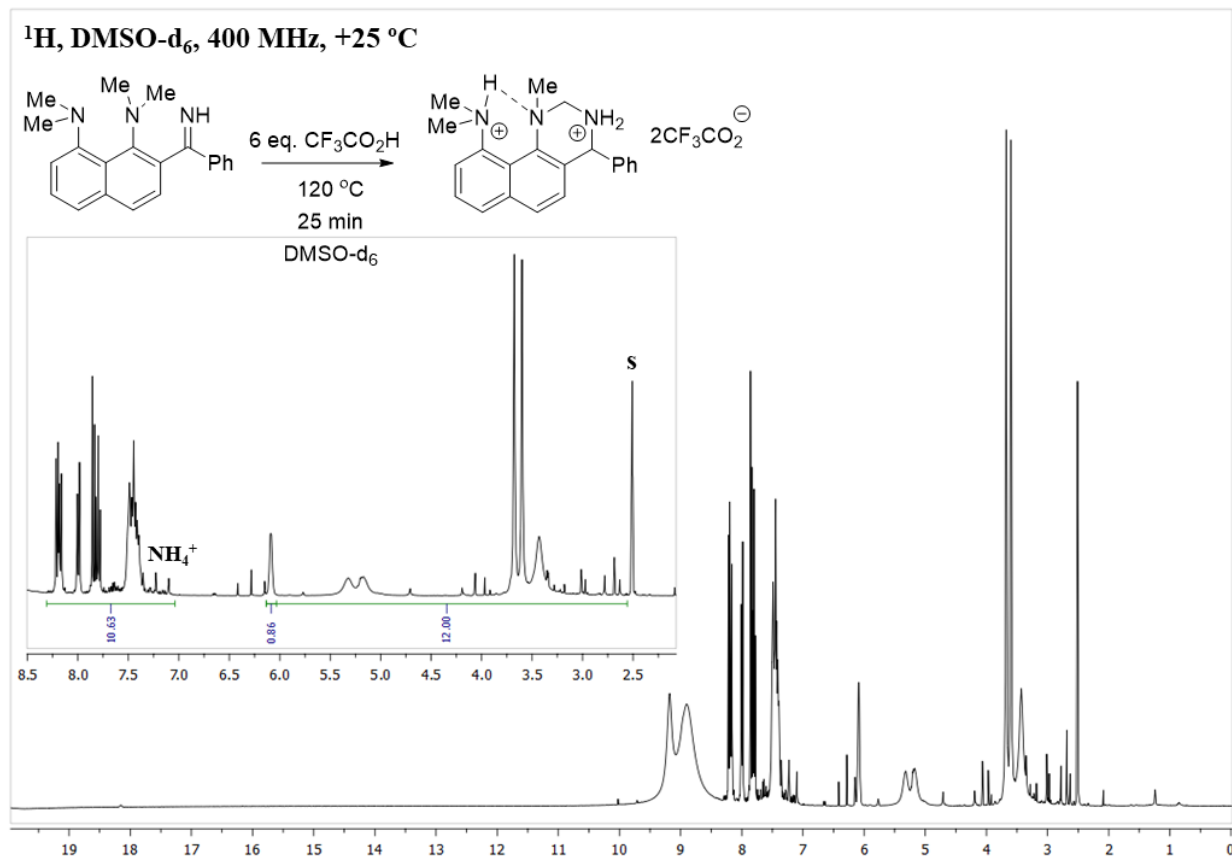

**Figure S11.**  $^1\text{H}$  NMR spectrum of the reaction mixture for entry 11 (table 1).

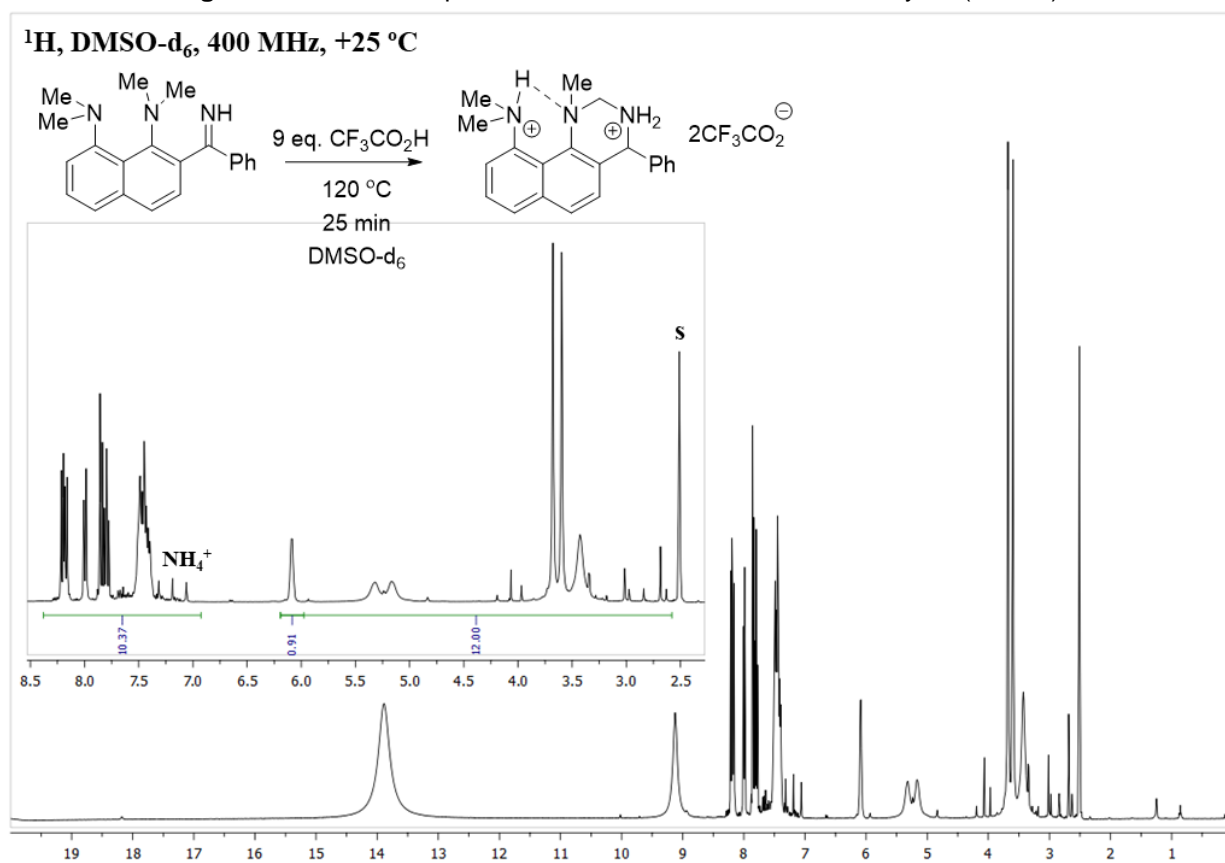

**Figure S12.**  $^1\text{H}$  NMR spectrum of the reaction mixture for entry 12 (table 1).



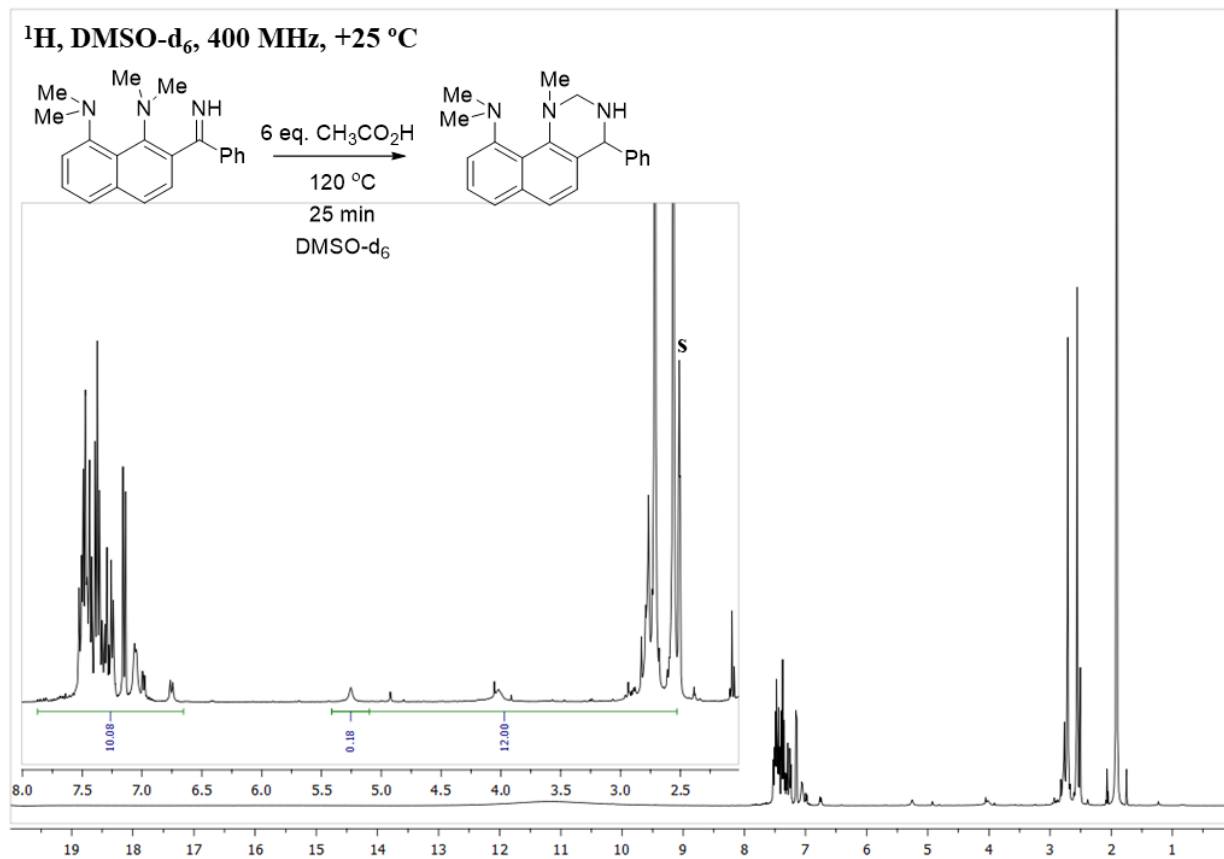

**Figure S13.**  $^1\text{H}$  NMR spectrum of the reaction mixture for entry 13 (table 1).

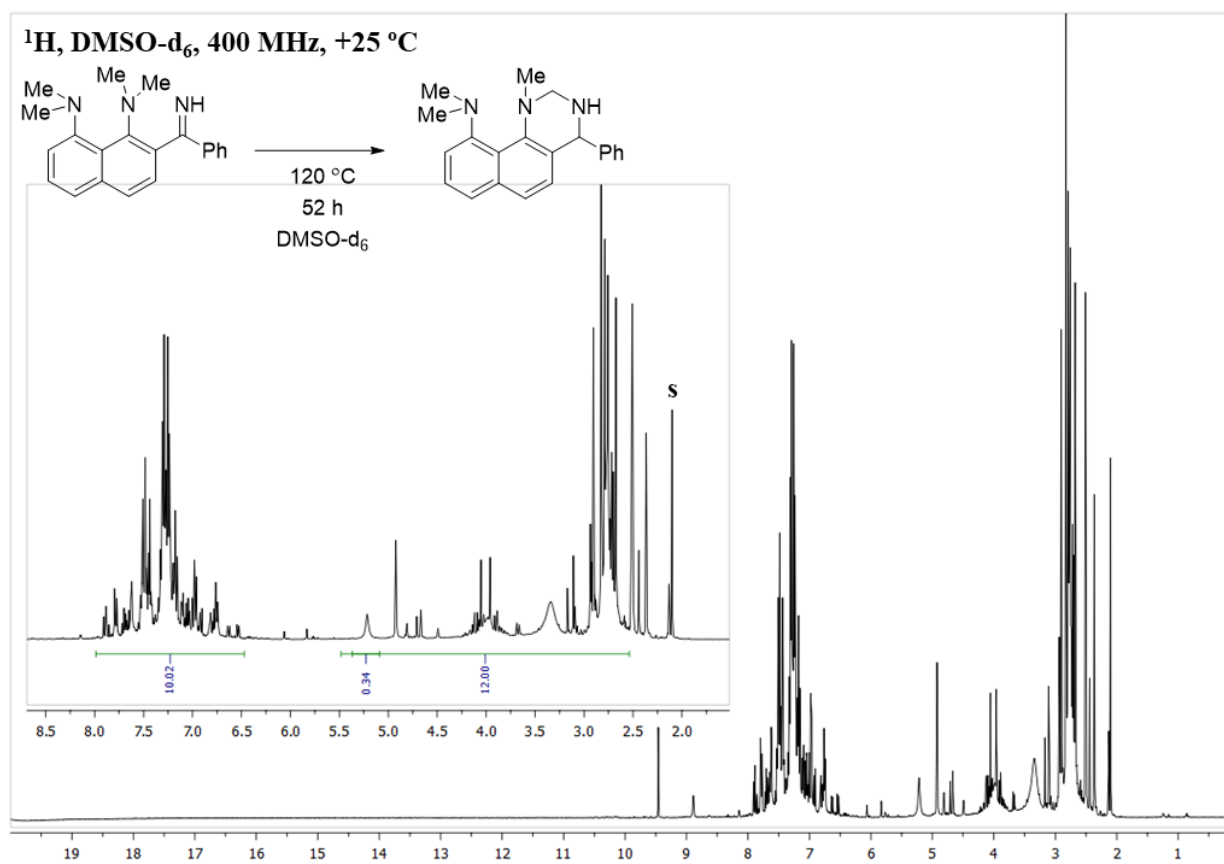

**Figure S14.**  $^1\text{H}$  NMR spectrum of the reaction mixture for entry 14 (table 1).

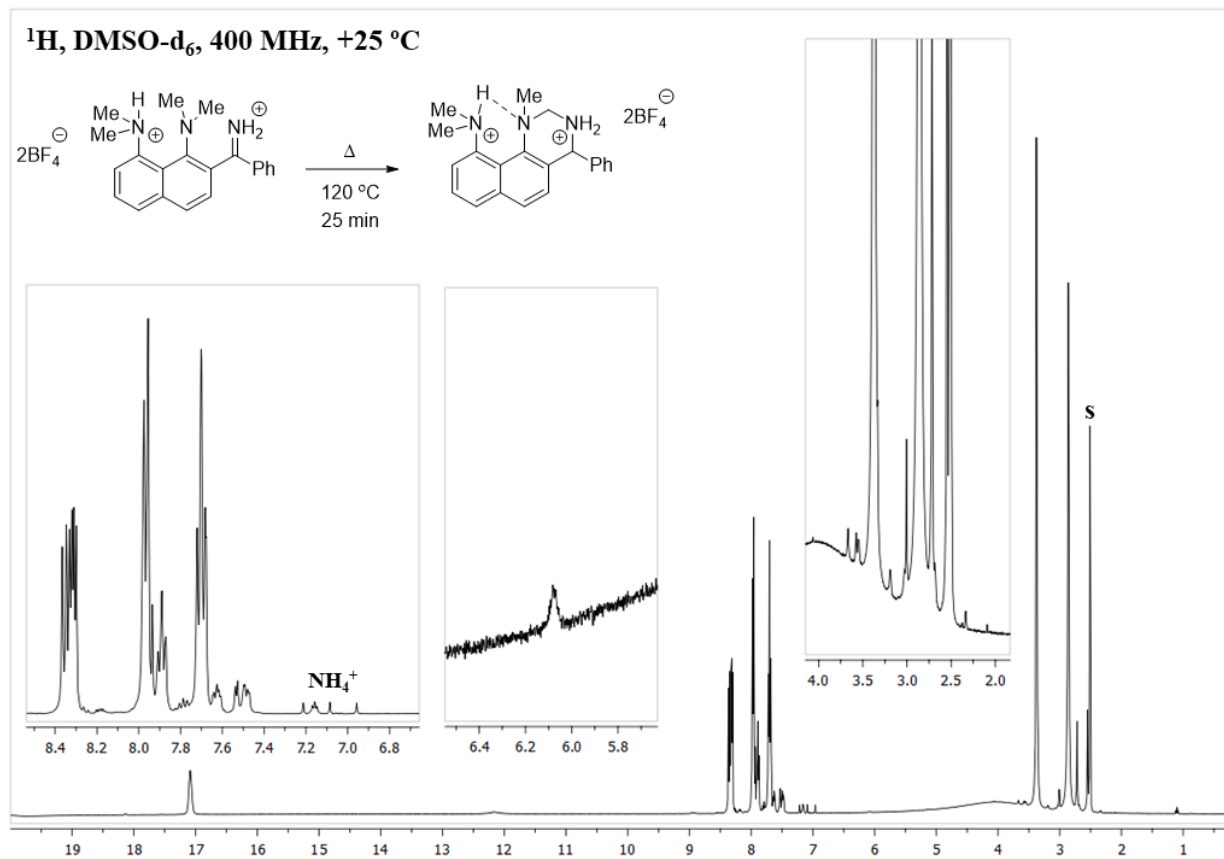

**Figure S15.**  $^1\text{H}$  NMR spectrum of the reaction mixture for entry 15 (table 1).

NMR spectra of protonated 1,8-bis(dimethylamino)naphthalene *ortho*-ketimines

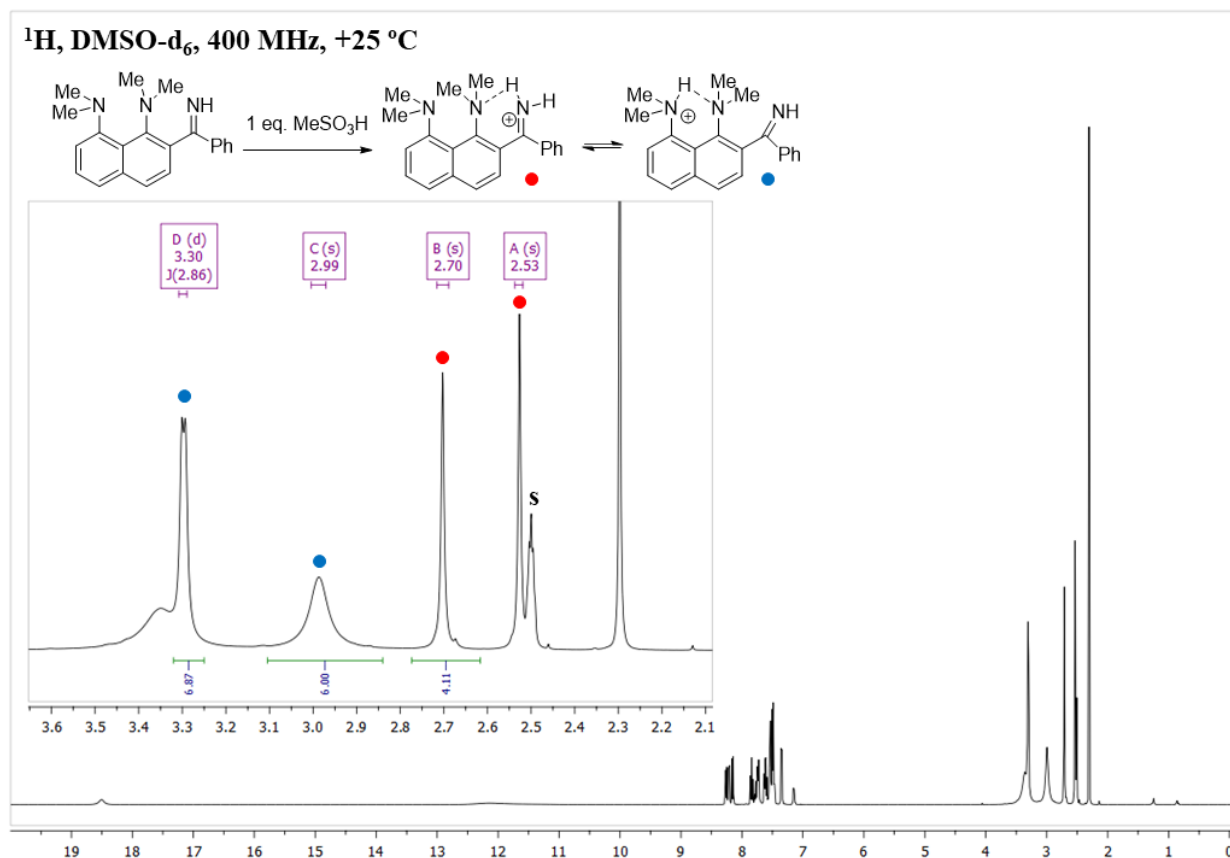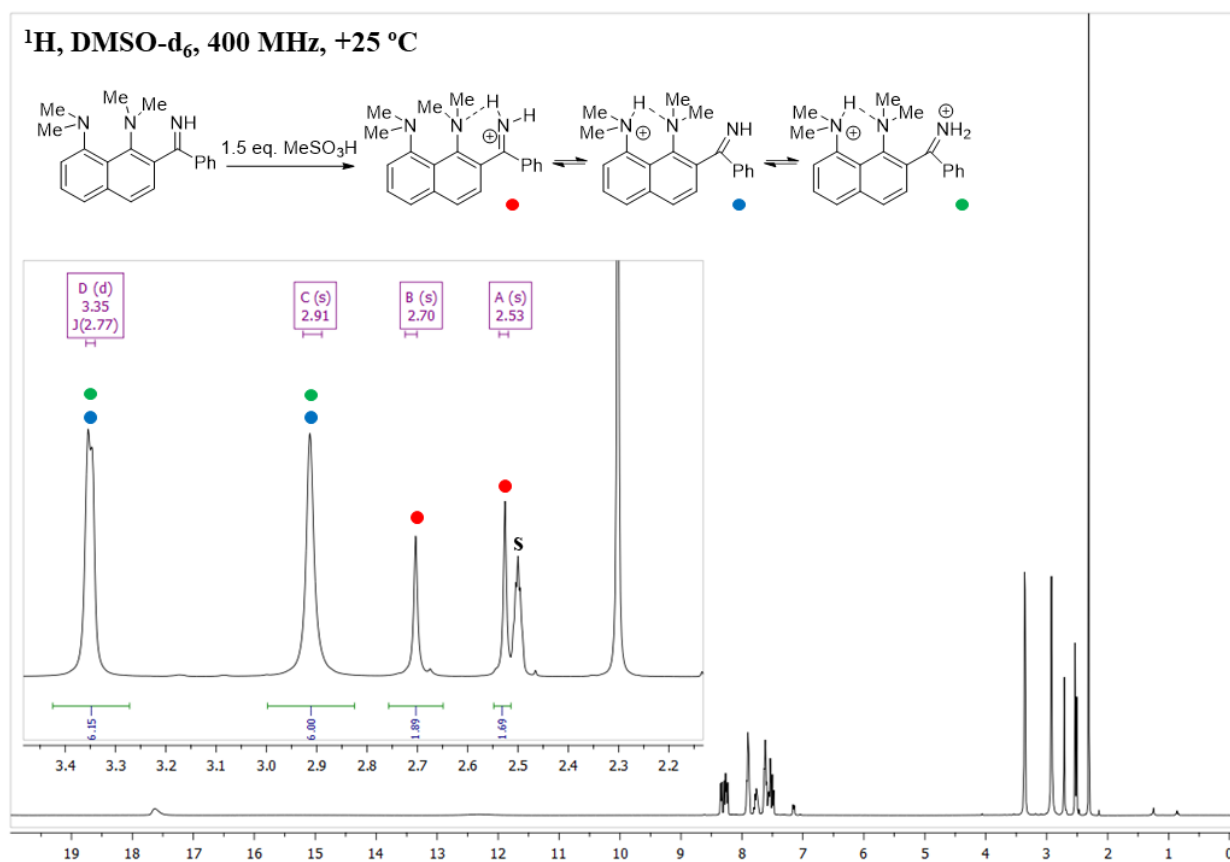

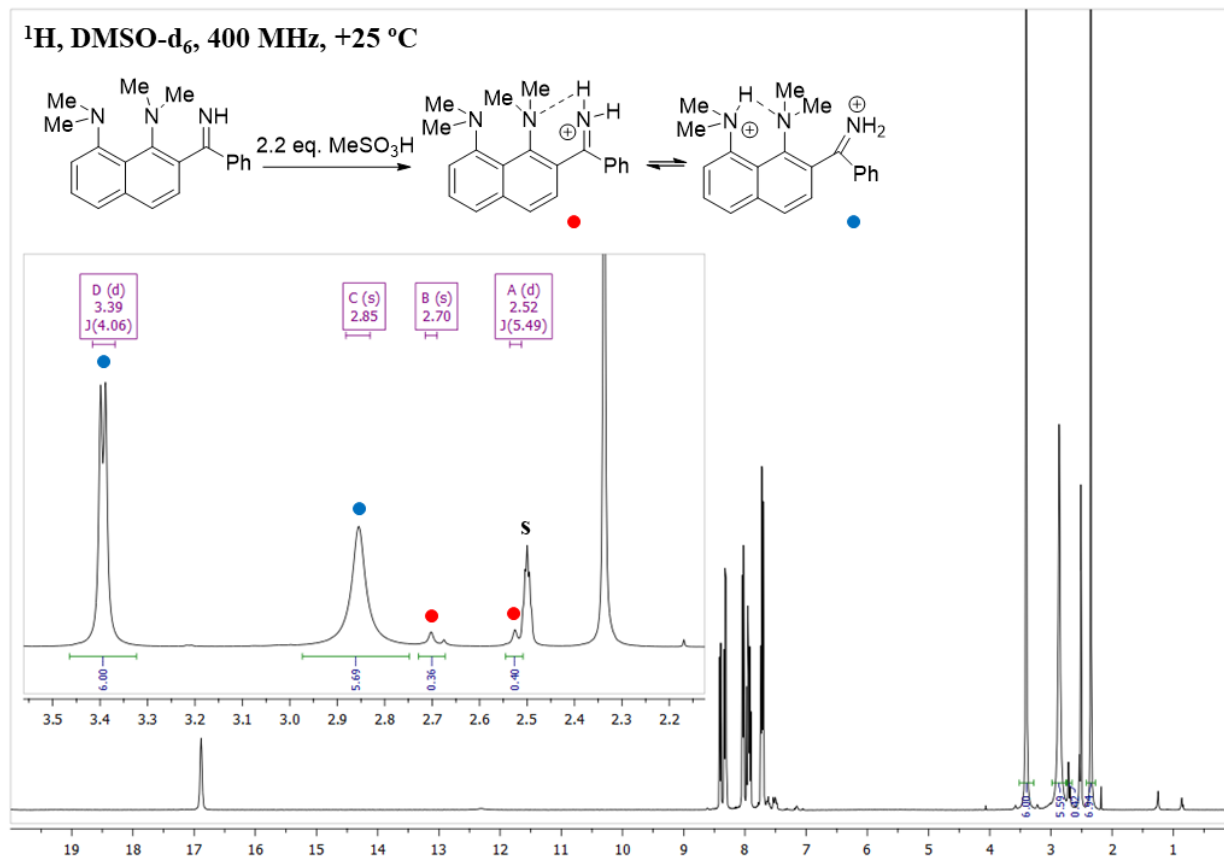

Figure S18.  $^1\text{H}$  NMR spectrum of the protonated *ortho*-ketimine **7a**.

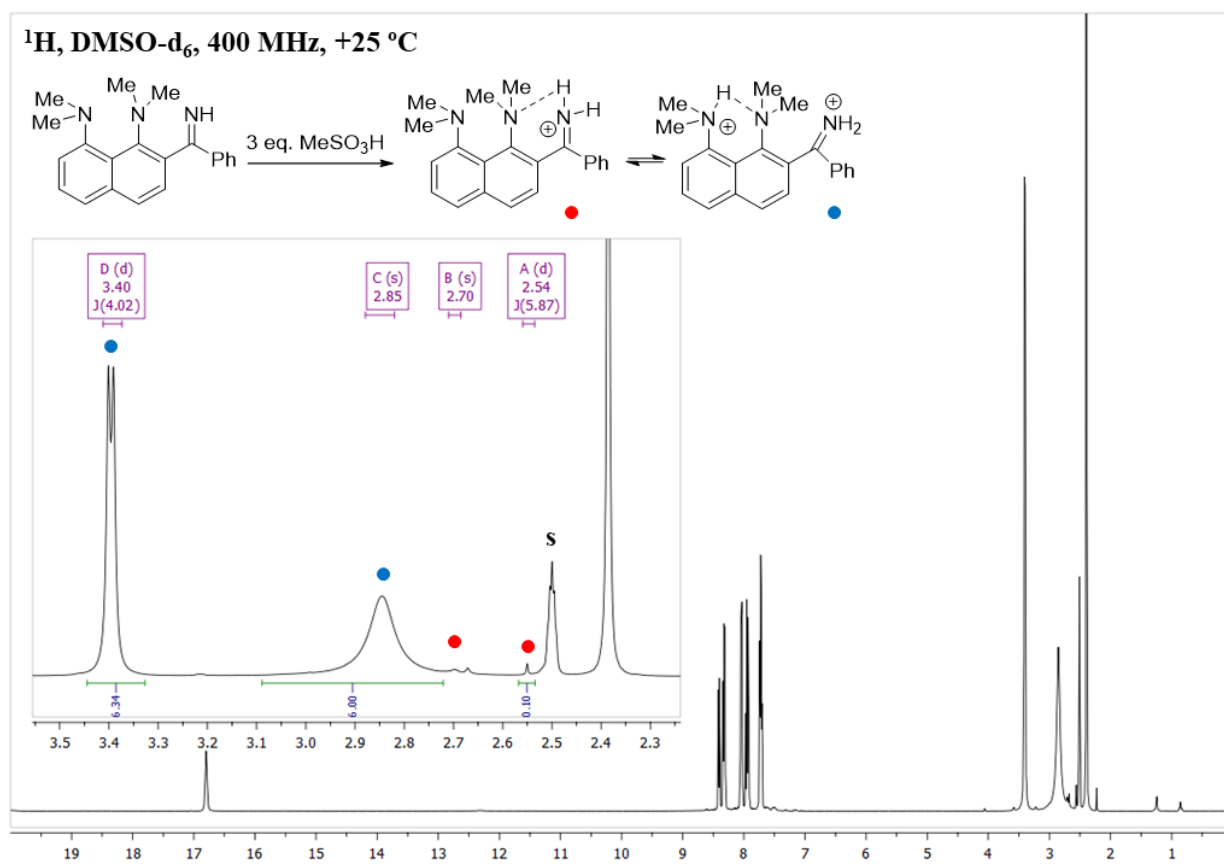

Figure S19.  $^1\text{H}$  NMR spectrum of the protonated *ortho*-ketimine **7a**.

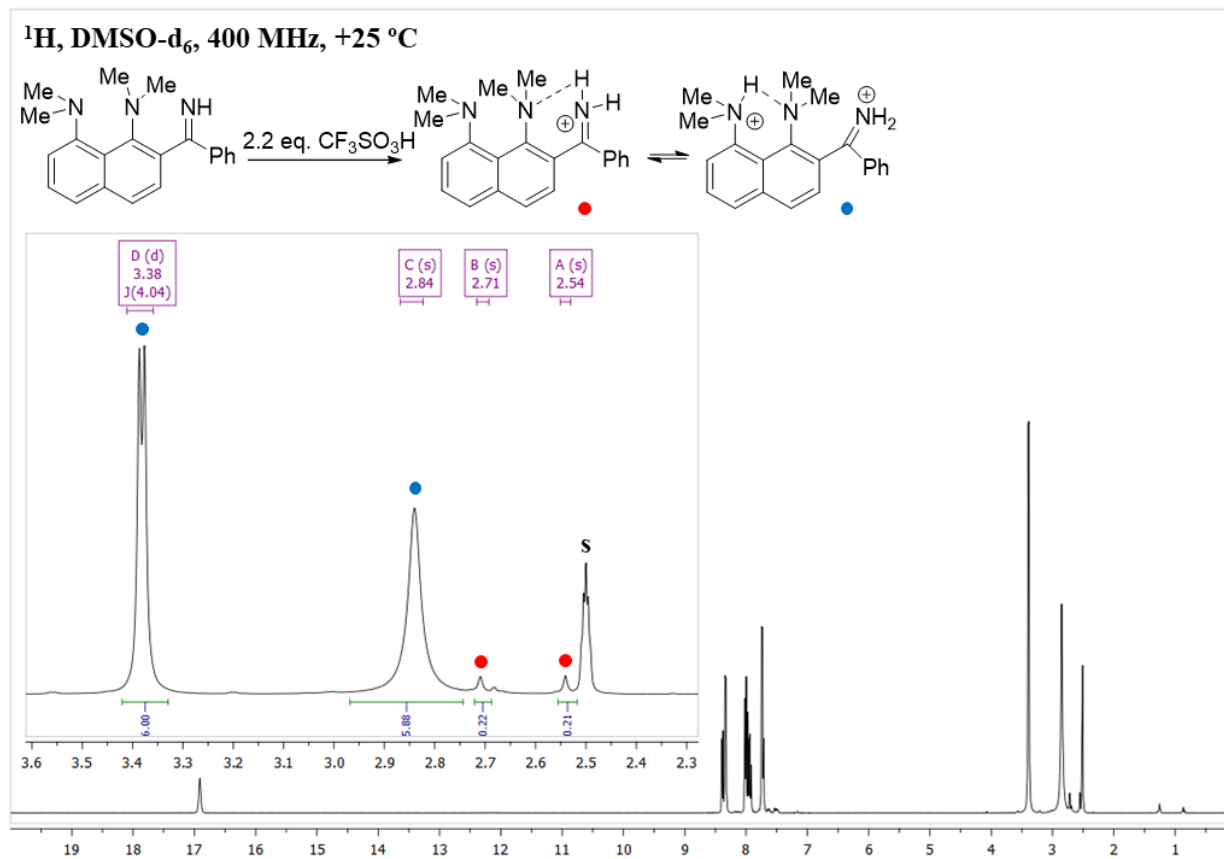

Figure S20.  $^1\text{H}$  NMR spectrum of the protonated *ortho*-ketimine **7a**.

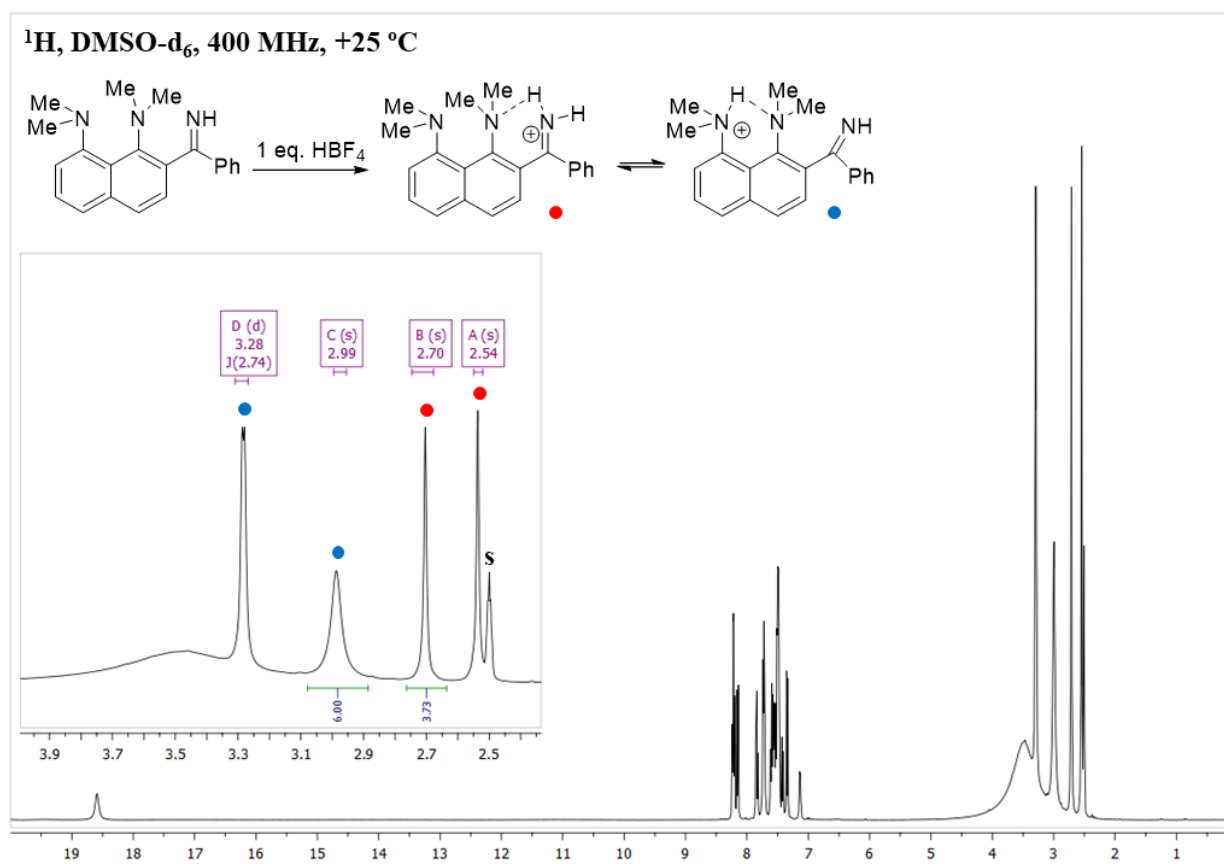

Figure S21.  $^1\text{H}$  NMR spectrum of the protonated *ortho*-ketimine **7a**.

$^1\text{H}$ , DMSO- $d_6$ , 400 MHz, +25 °C

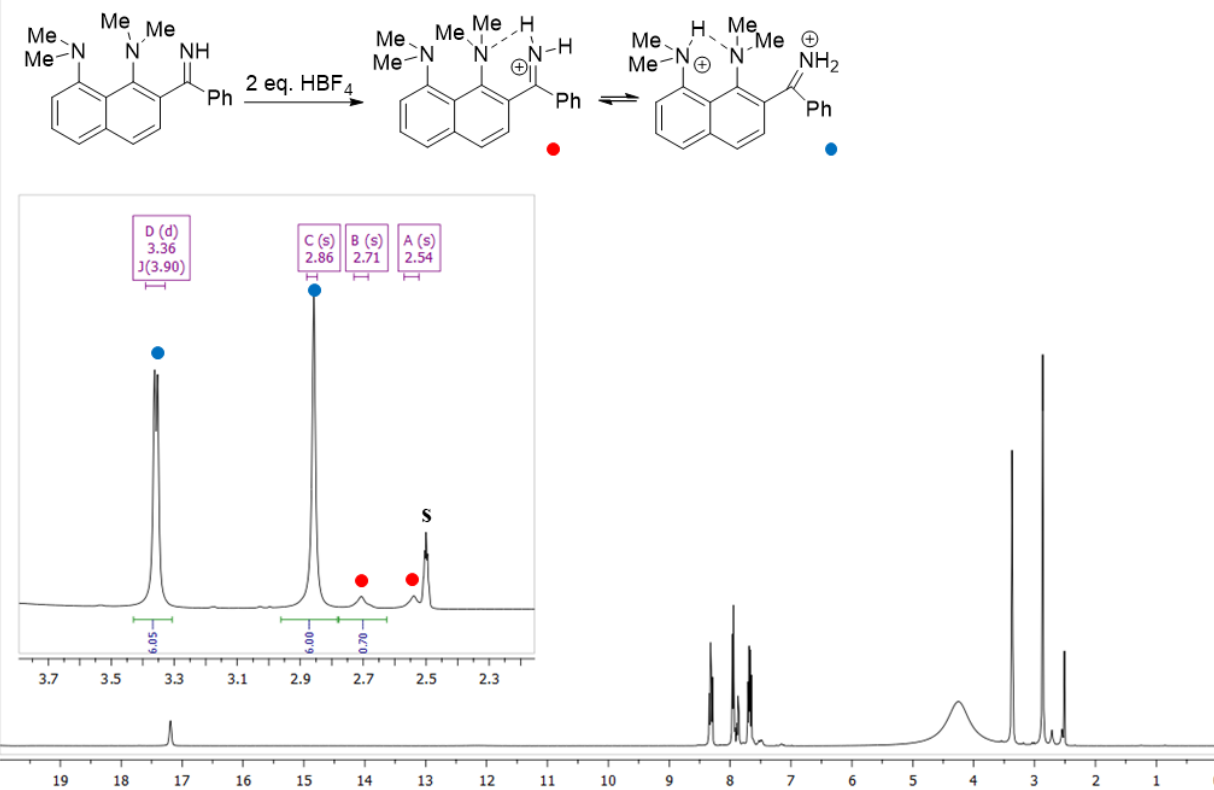

Figure S22.  $^1\text{H}$  NMR spectrum of the protonated *ortho*-ketimine **7a**.

$^1\text{H}$ , DMSO- $d_6$ , 400 MHz, +25 °C

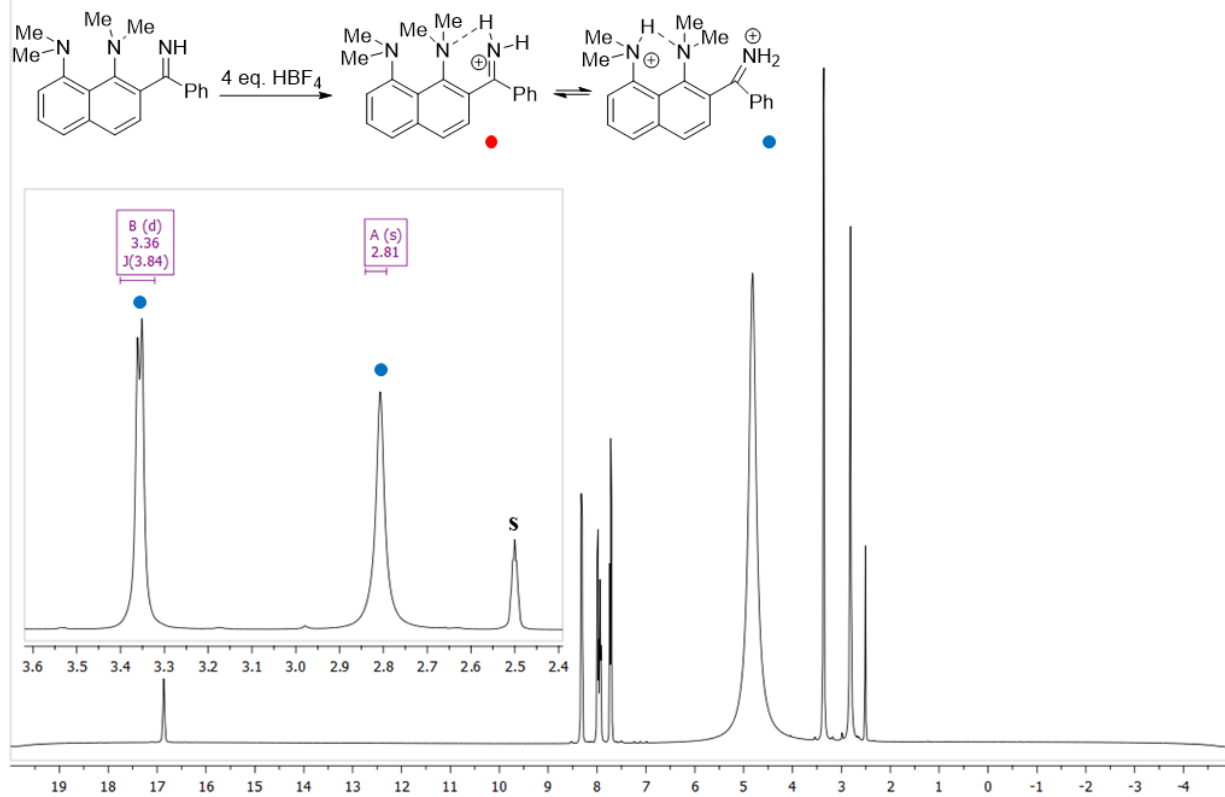

Figure S23.  $^1\text{H}$  NMR spectrum of the protonated *ortho*-ketimine **7a**.

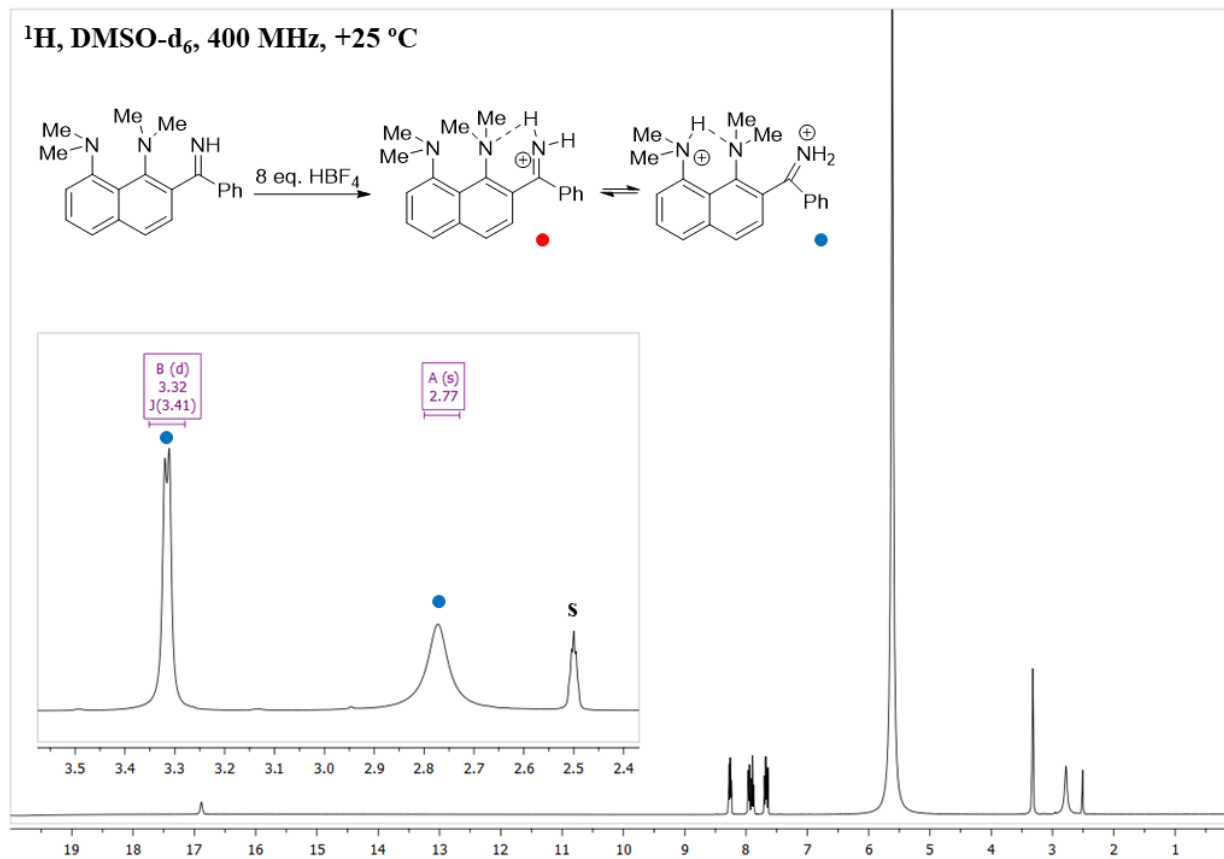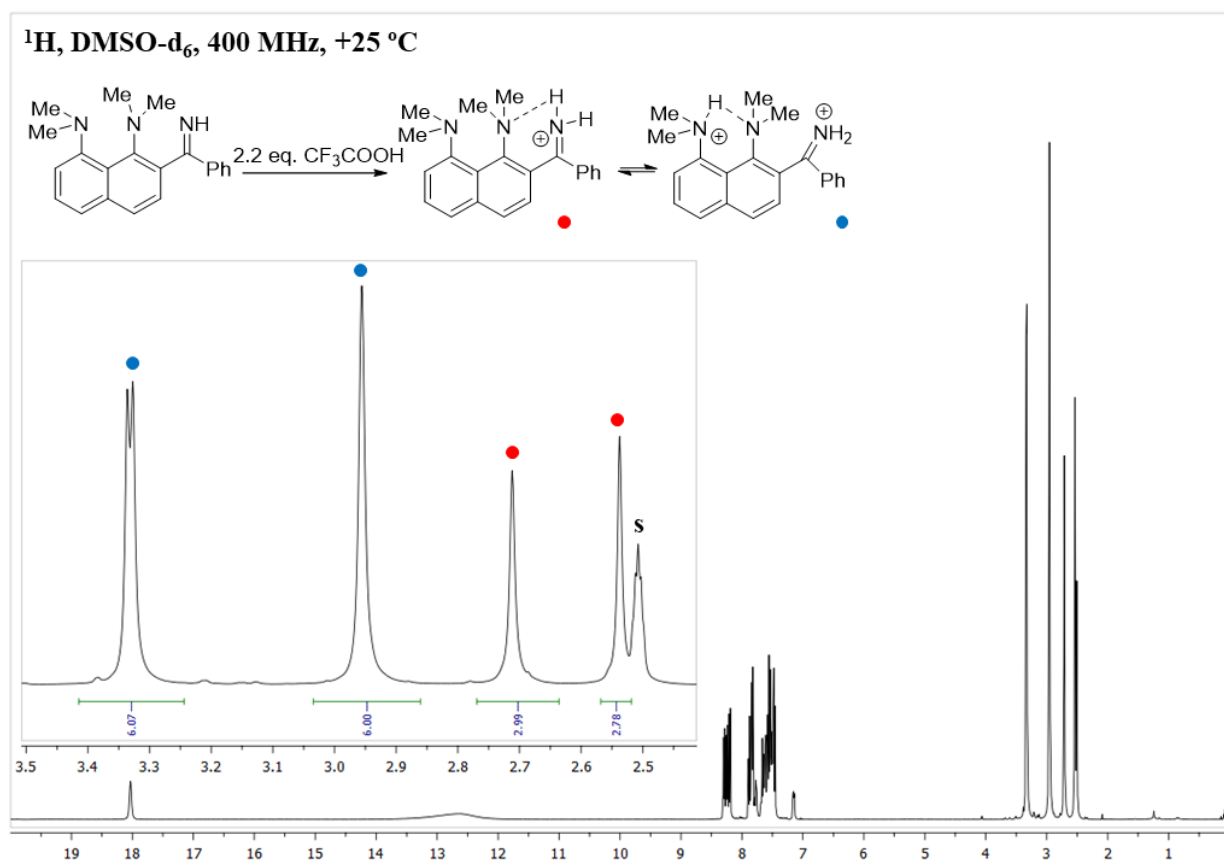

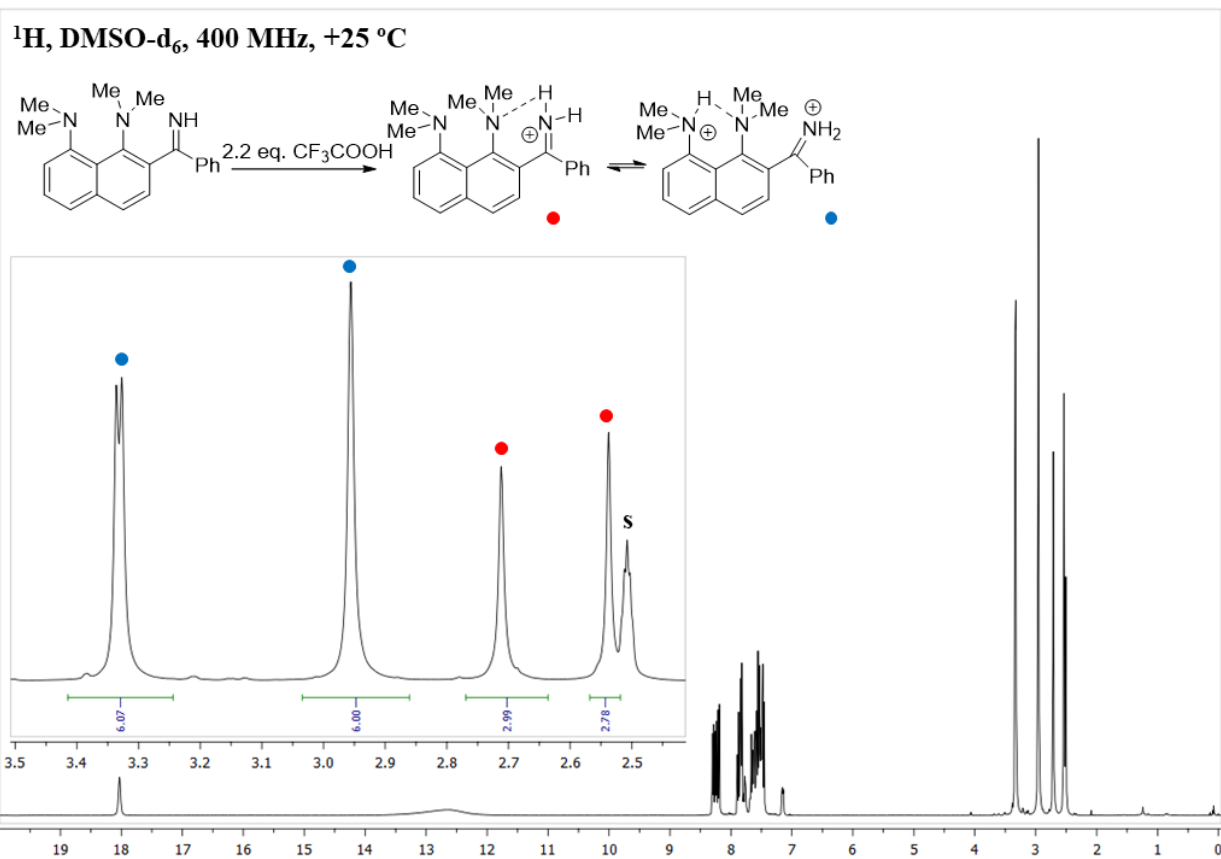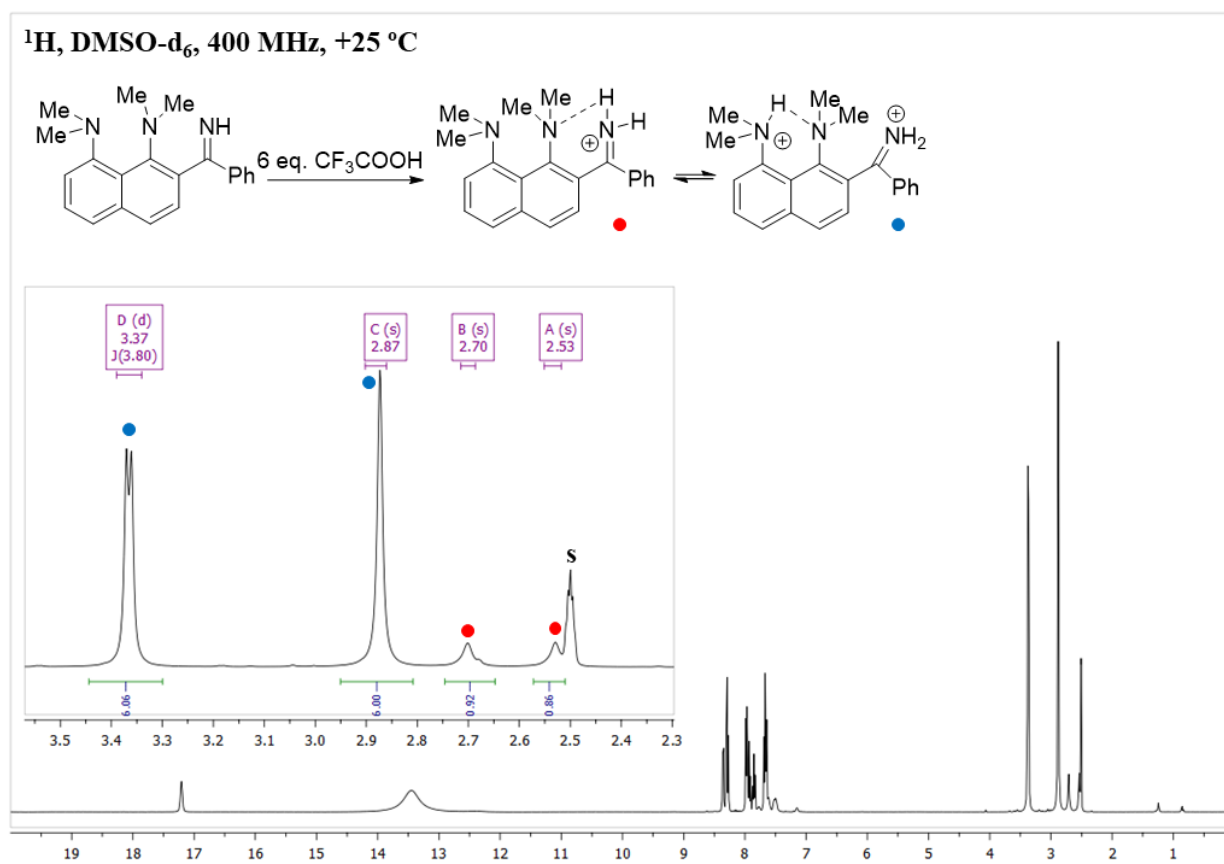



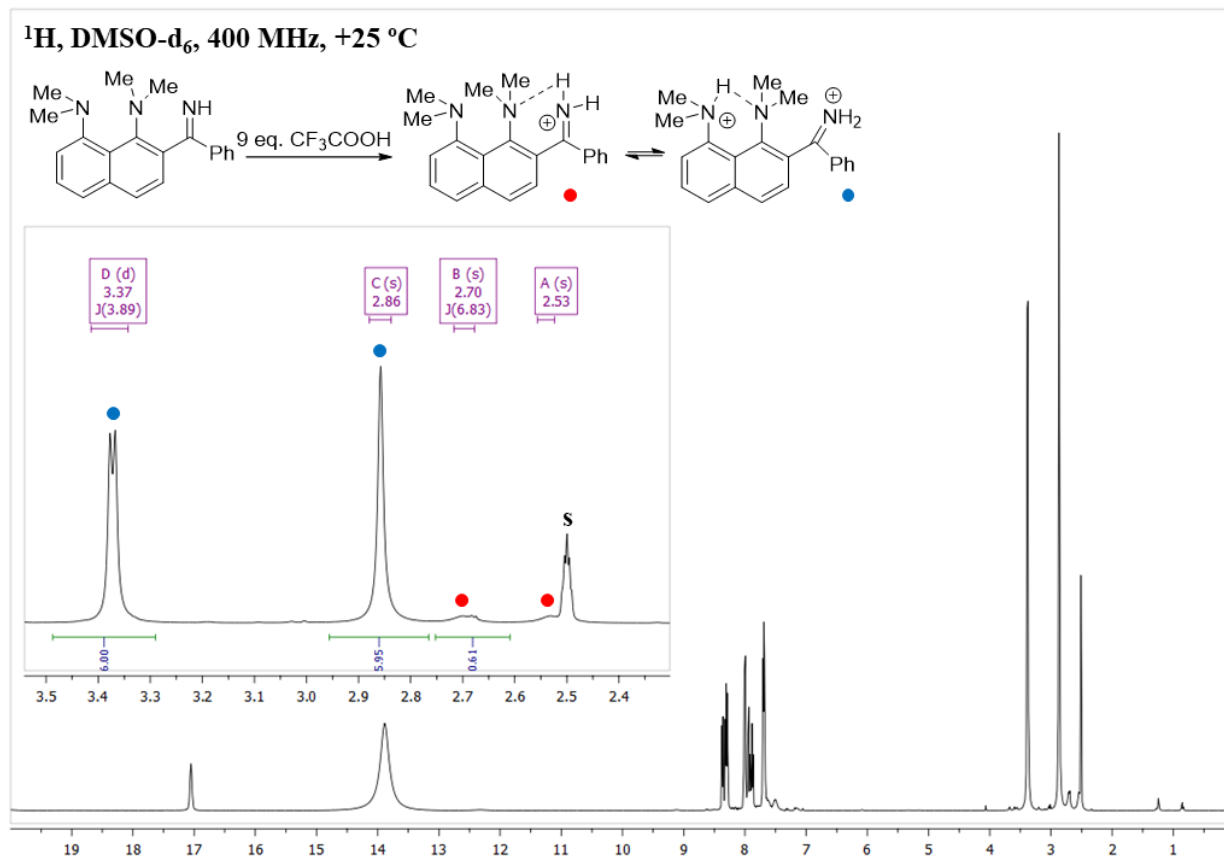

**Figure S28.**  $^1\text{H}$  NMR spectrum of the protonated *ortho*-ketimine **7a**.

## Compounds NMR spectra

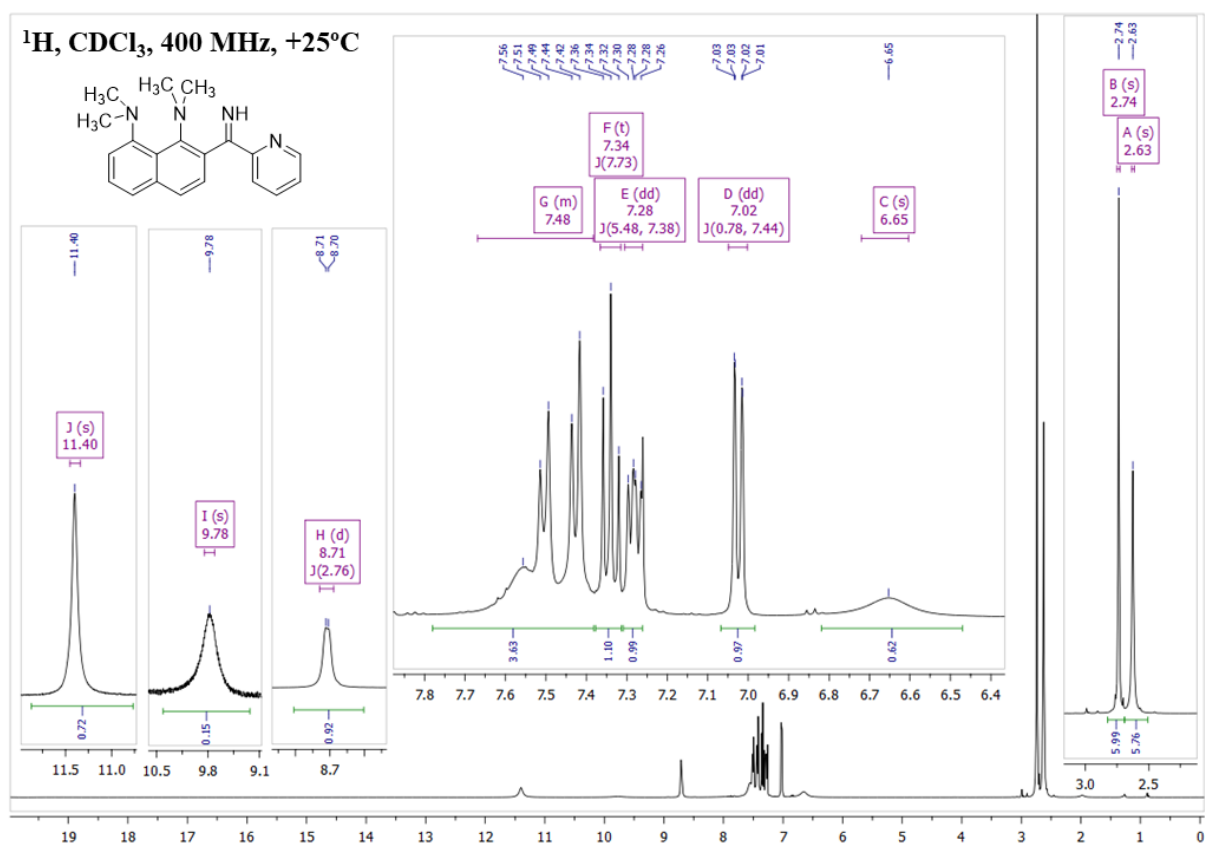

Figure S29.  $^1\text{H}$  NMR spectrum of **7h**.

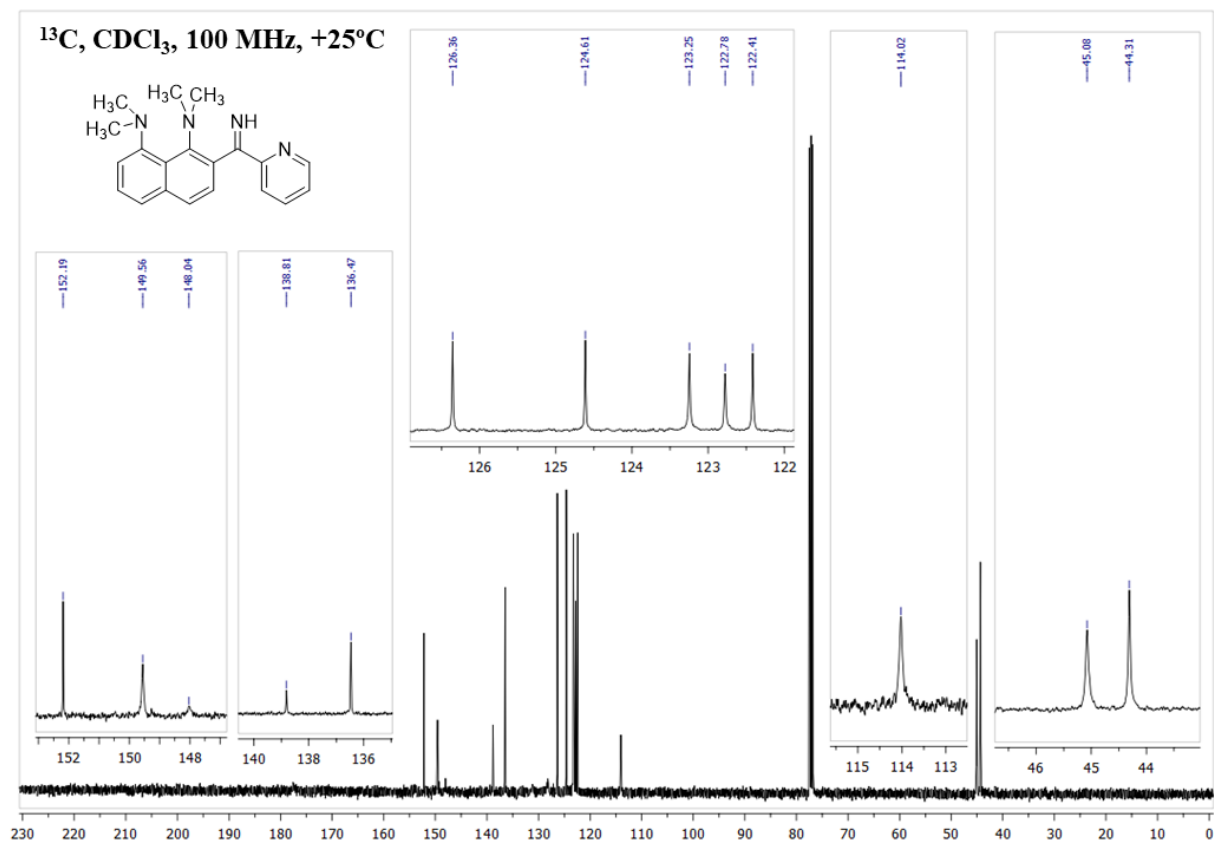

Figure S30.  $^{13}\text{C}$  NMR spectrum of **7h**.

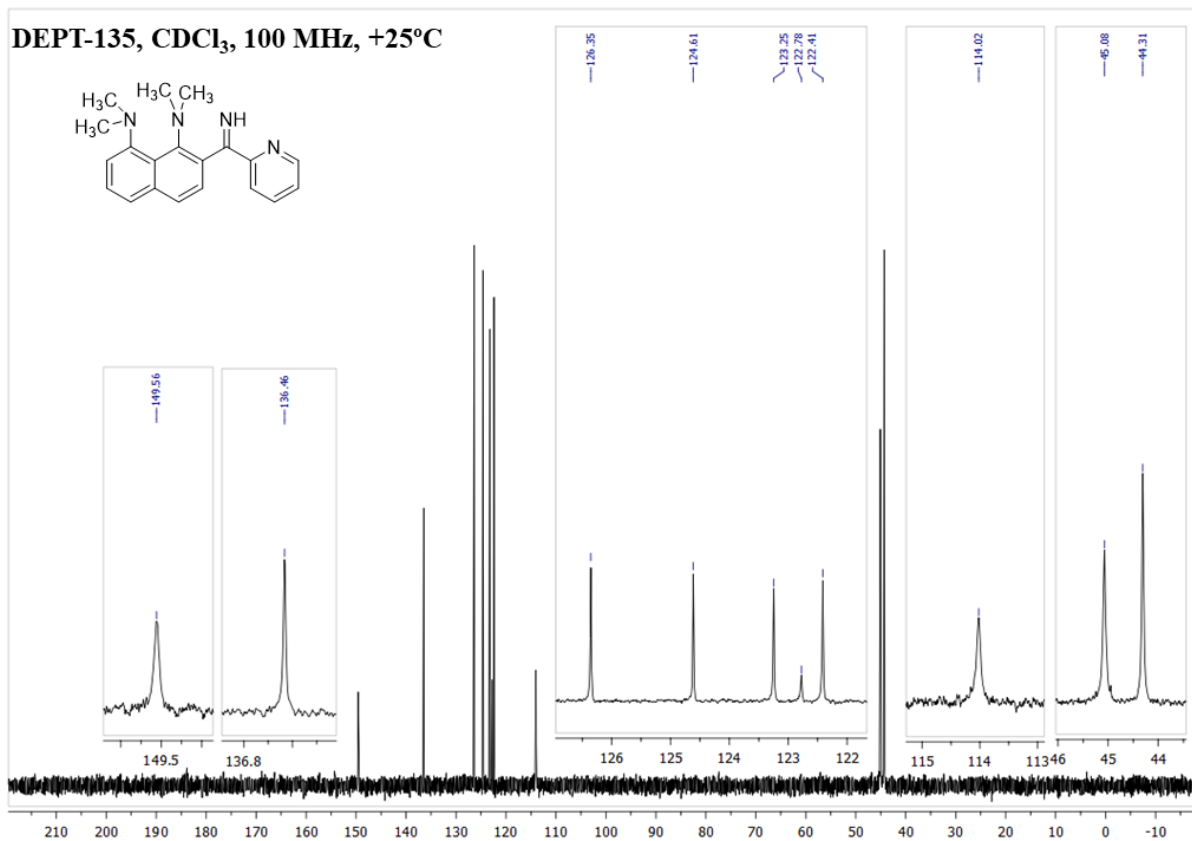

**Figure S31.** <sup>13</sup>C DEPT NMR spectrum of 7h.

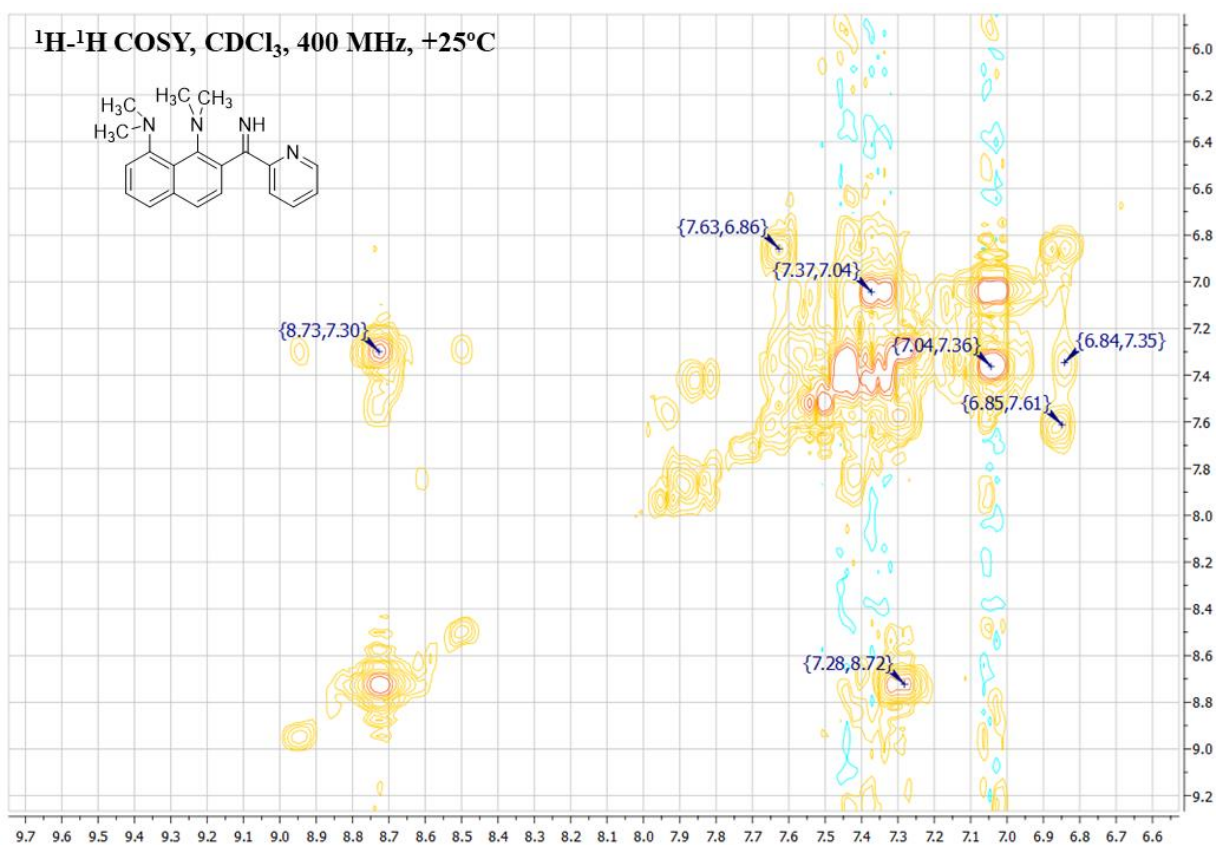

**Figure S32.** <sup>1</sup>H-<sup>1</sup>H COSY NMR spectrum of 7h.

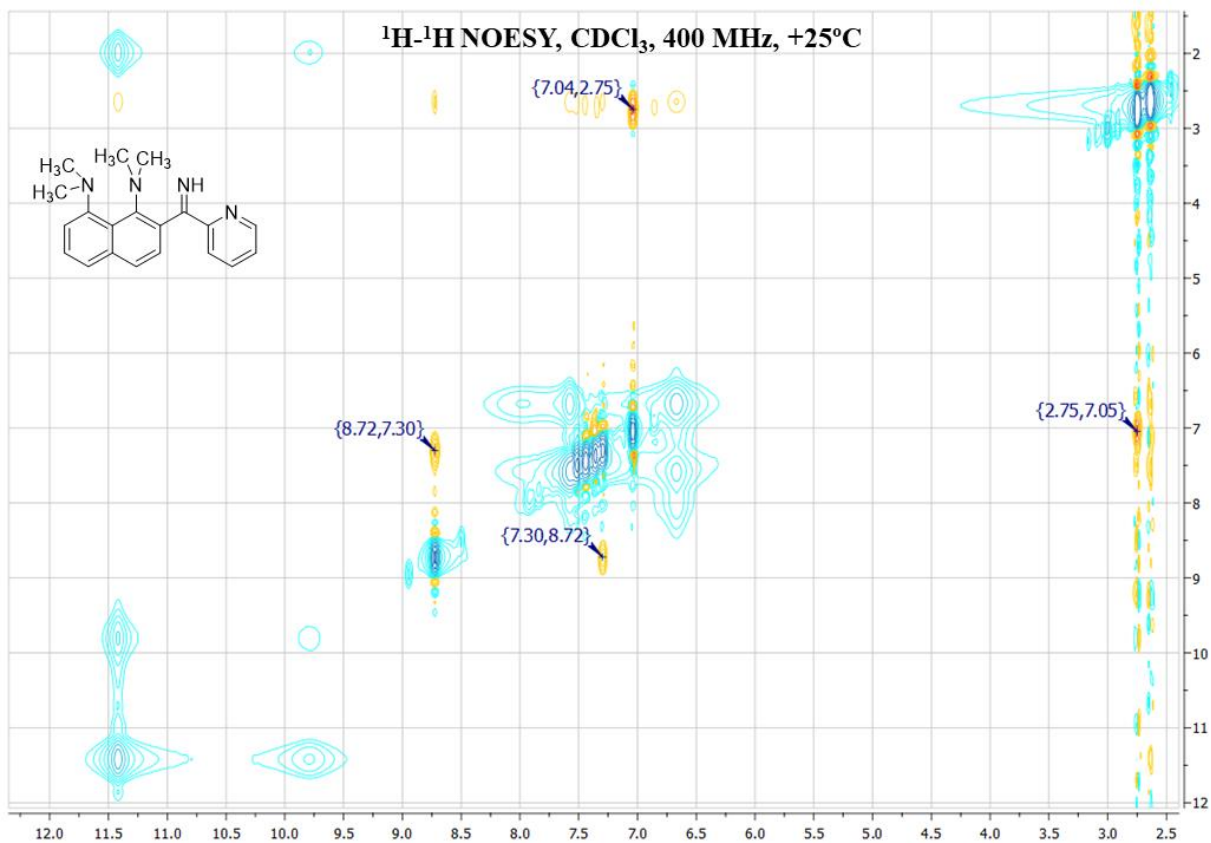

**Figure S33.**  $^1\text{H}$ - $^1\text{H}$  NOESY NMR spectrum of **7h**.

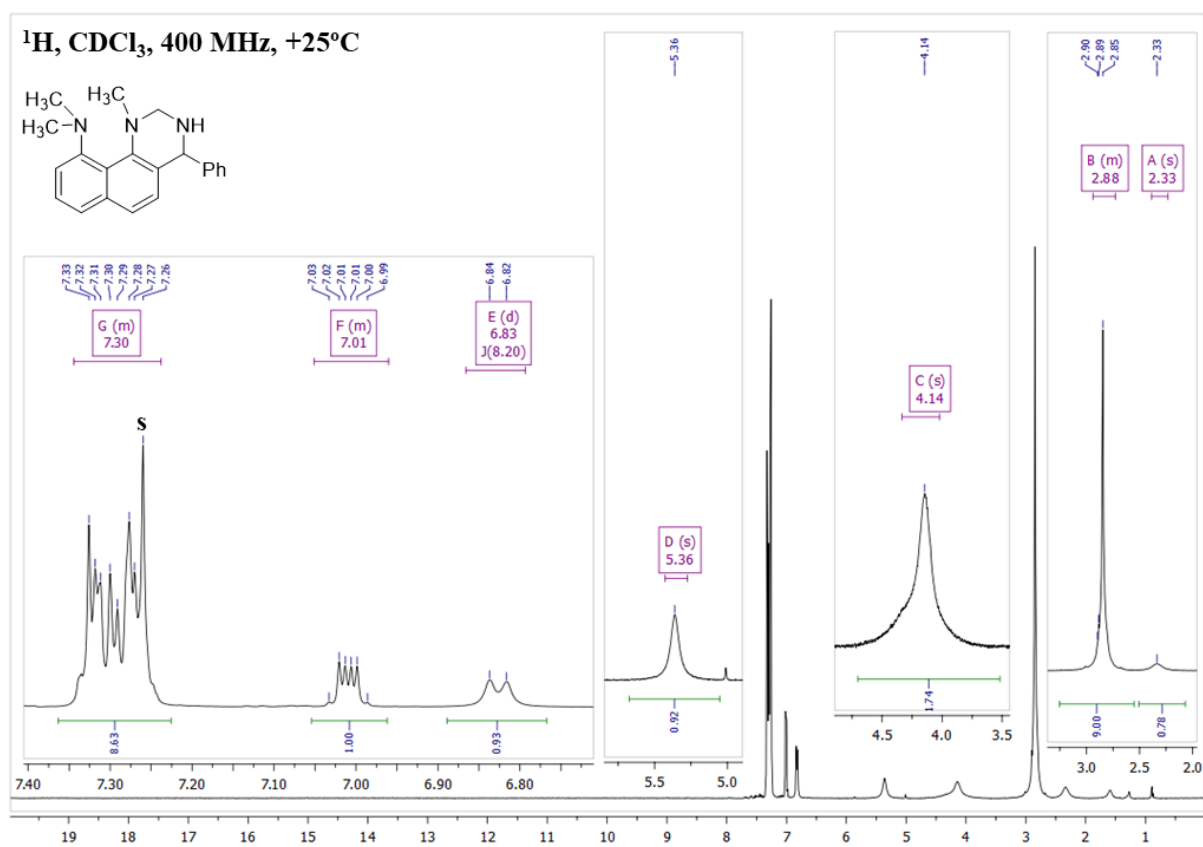

**Figure S34.**  $^1\text{H}$  NMR spectrum of **8a**.

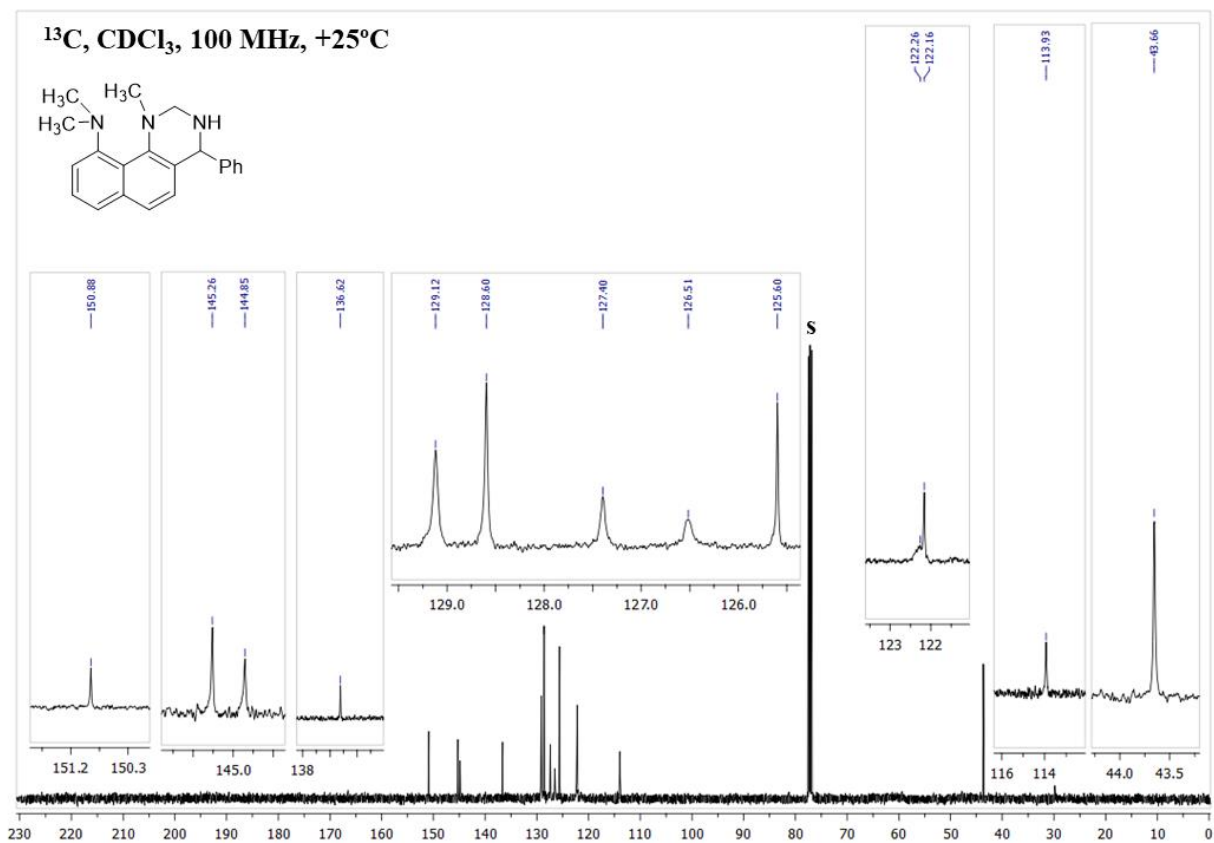

Figure S35.  $^{13}\text{C}$  NMR spectrum of **8a**.

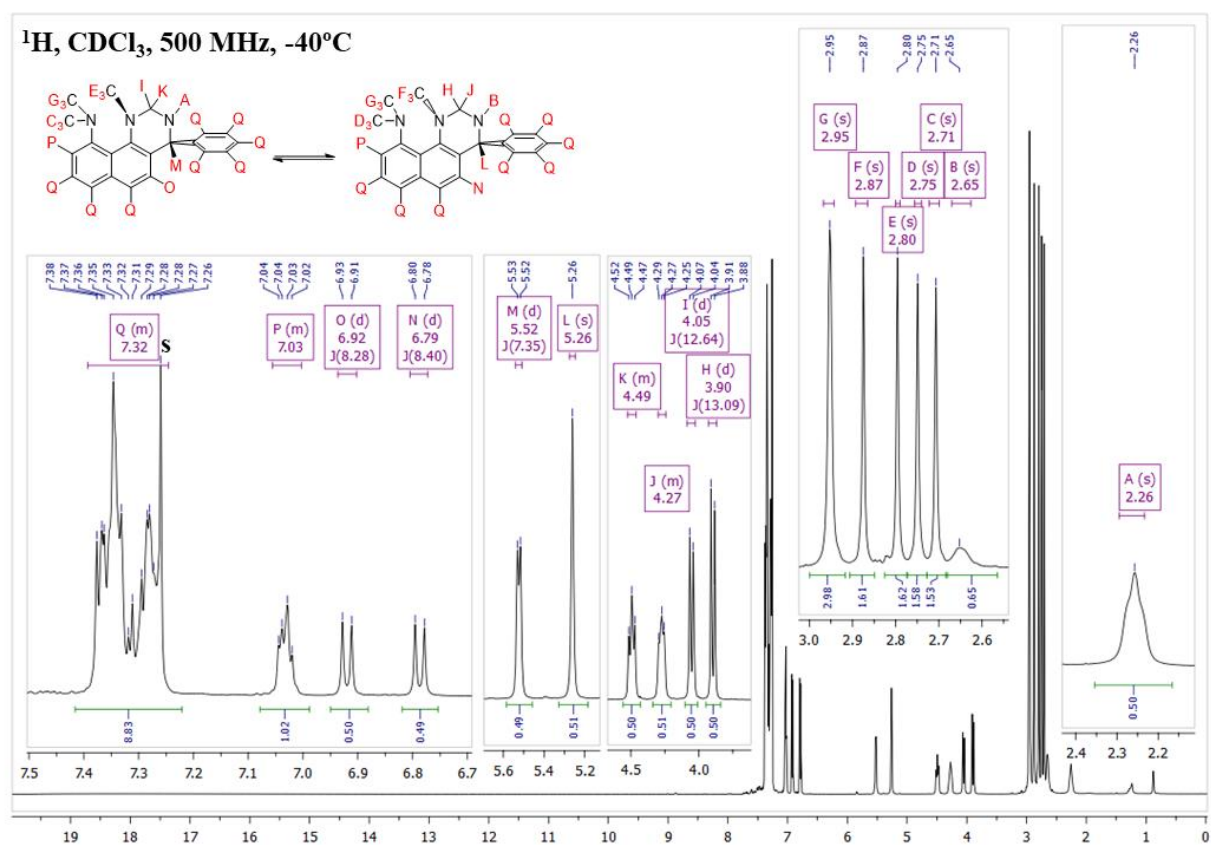

Figure S36.  $^1\text{H}$  NMR spectrum of **8a**.

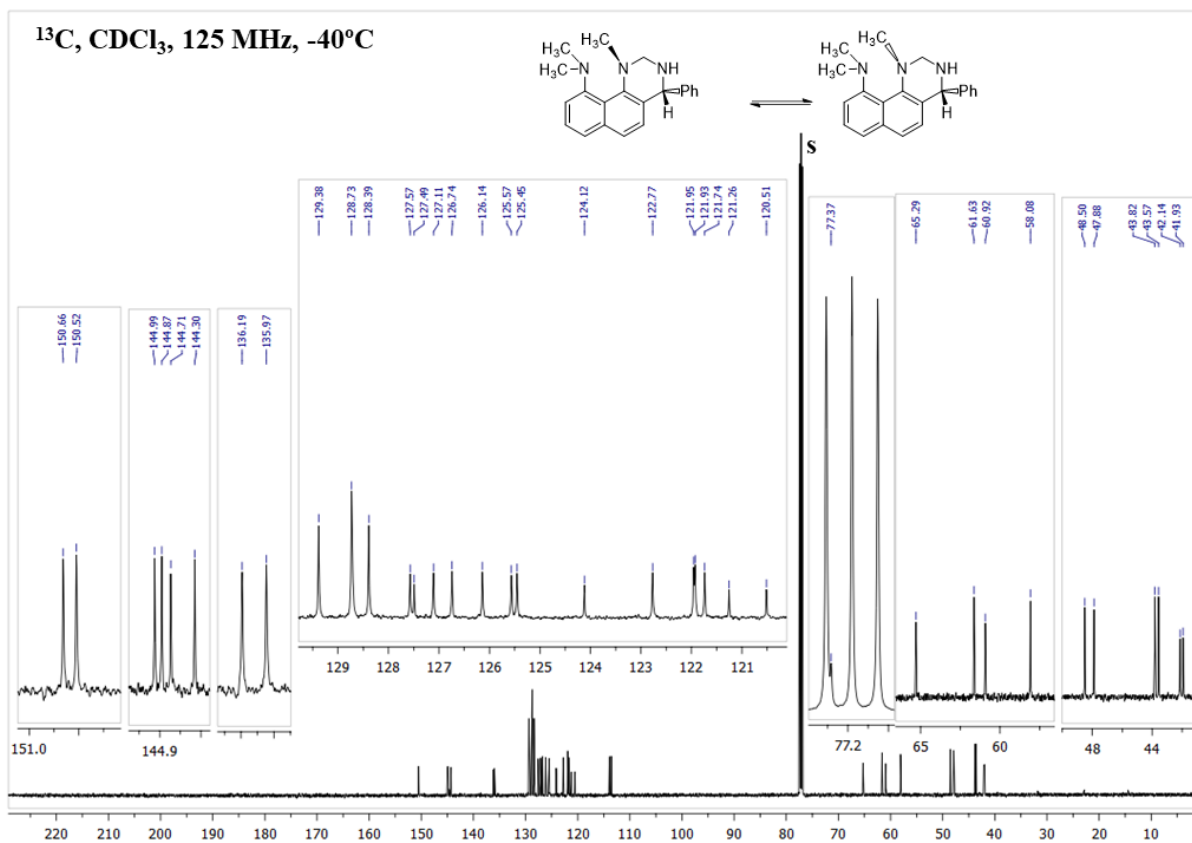

**Figure S37.**  $^{13}\text{C}$  NMR spectrum of **8a**.

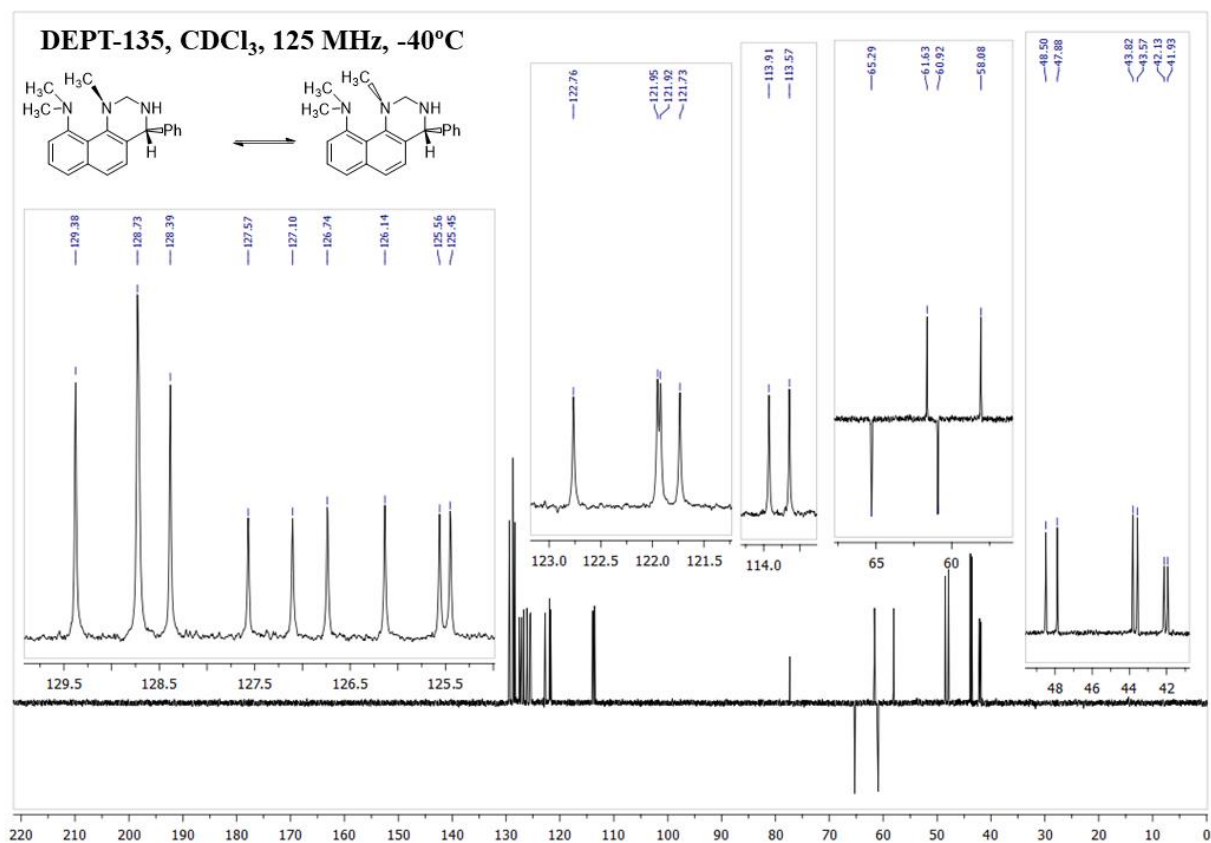

**Figure S38.**  $^{13}\text{C}$  DEPT NMR spectrum of **8a**.

$^1\text{H}$ - $^1\text{H}$  COSY,  $\text{CDCl}_3$ , 500 MHz,  $-40^\circ\text{C}$

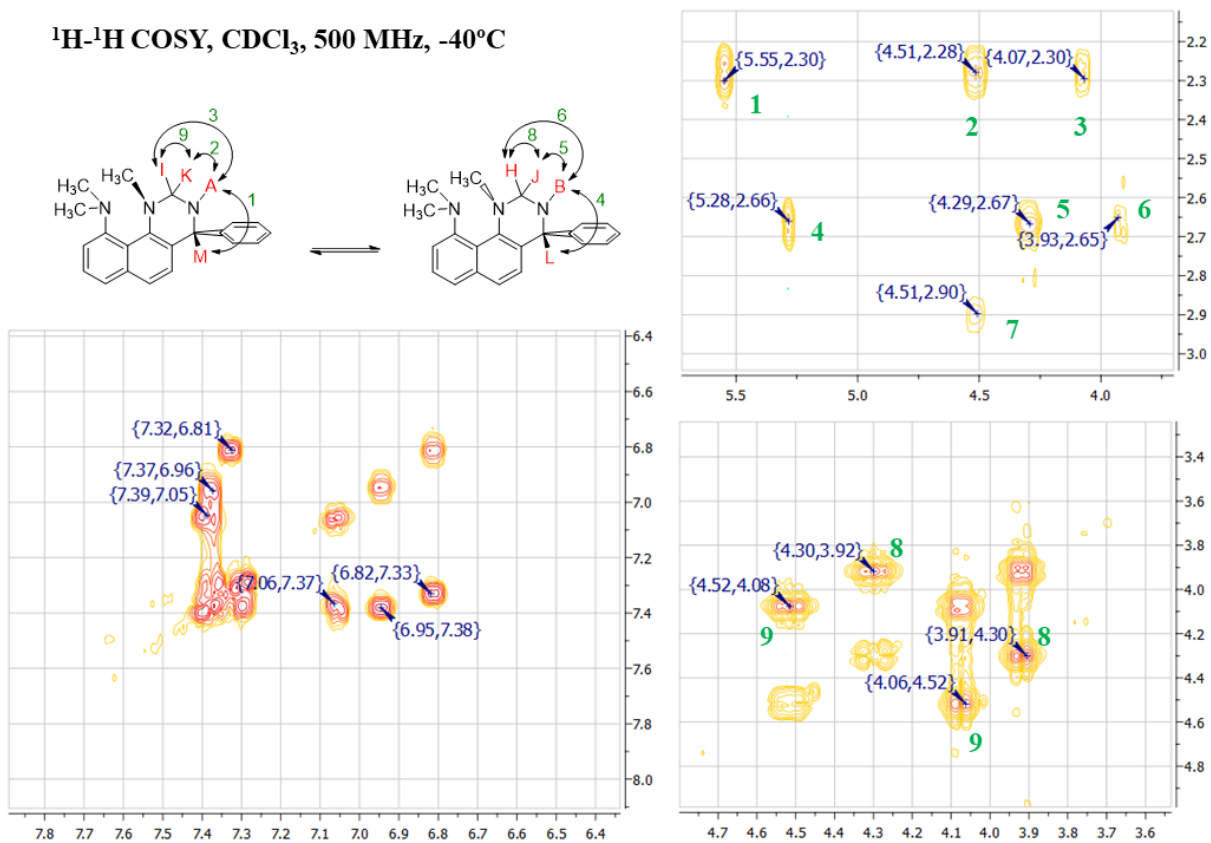

Figure S39.  $^1\text{H}$ - $^1\text{H}$  COSY NMR spectrum of **8a**.

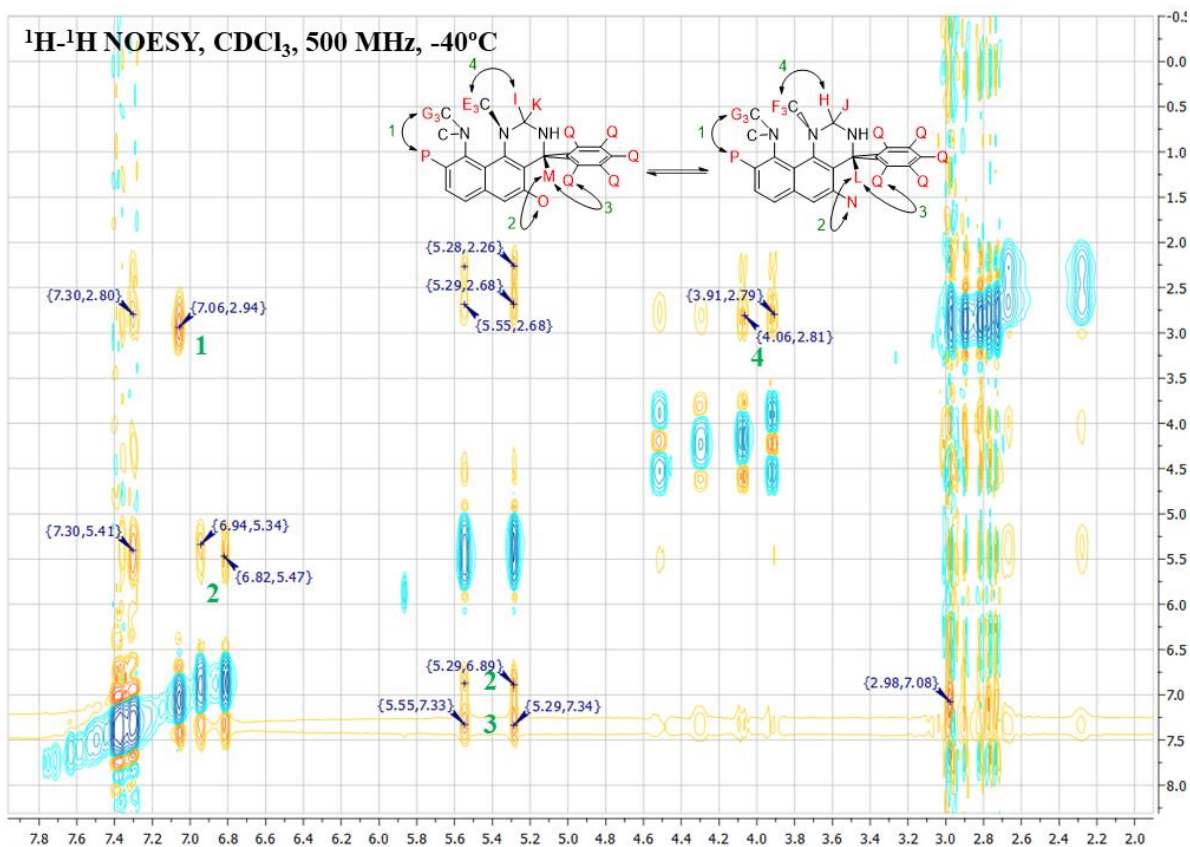

Figure S40.  $^1\text{H}$ - $^1\text{H}$  NOESY NMR spectrum of **8a**.

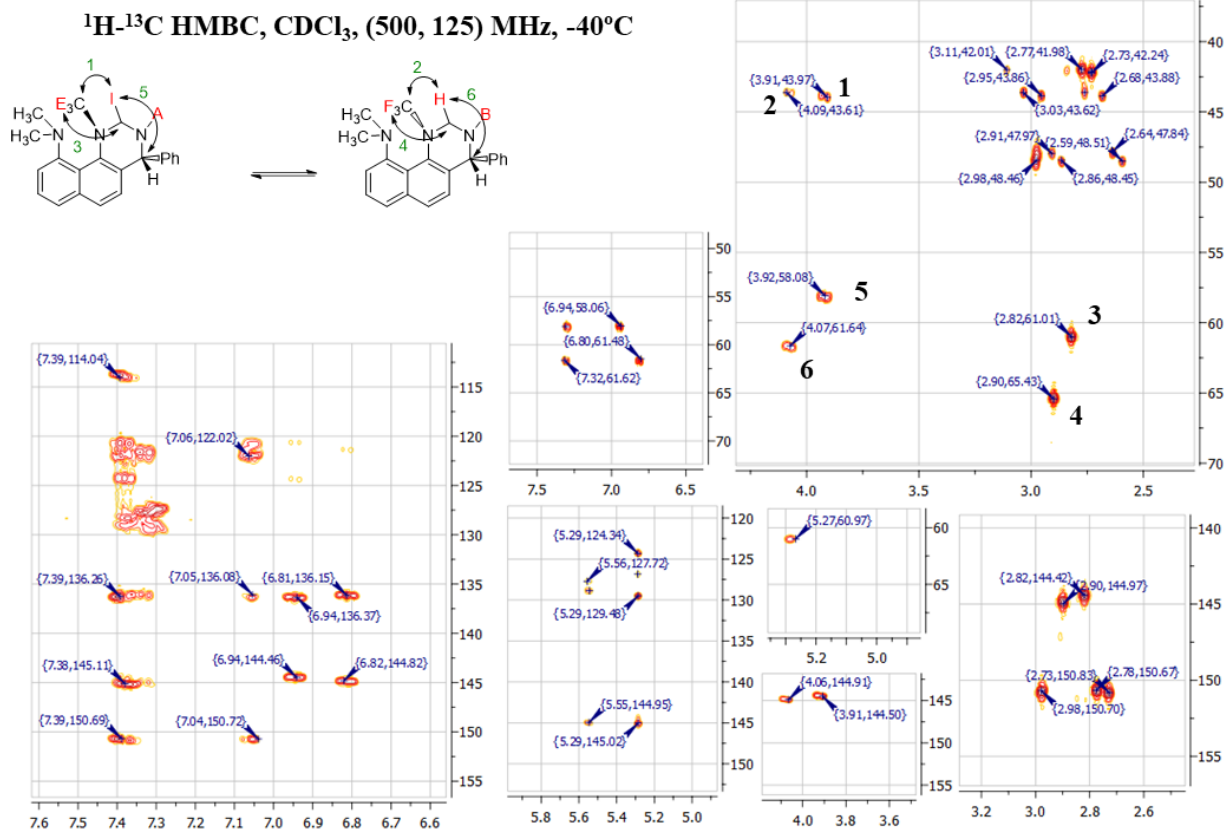

**Figure S41.**  $^1\text{H}$ - $^{13}\text{C}$  HMBC NMR spectrum of **8a**.

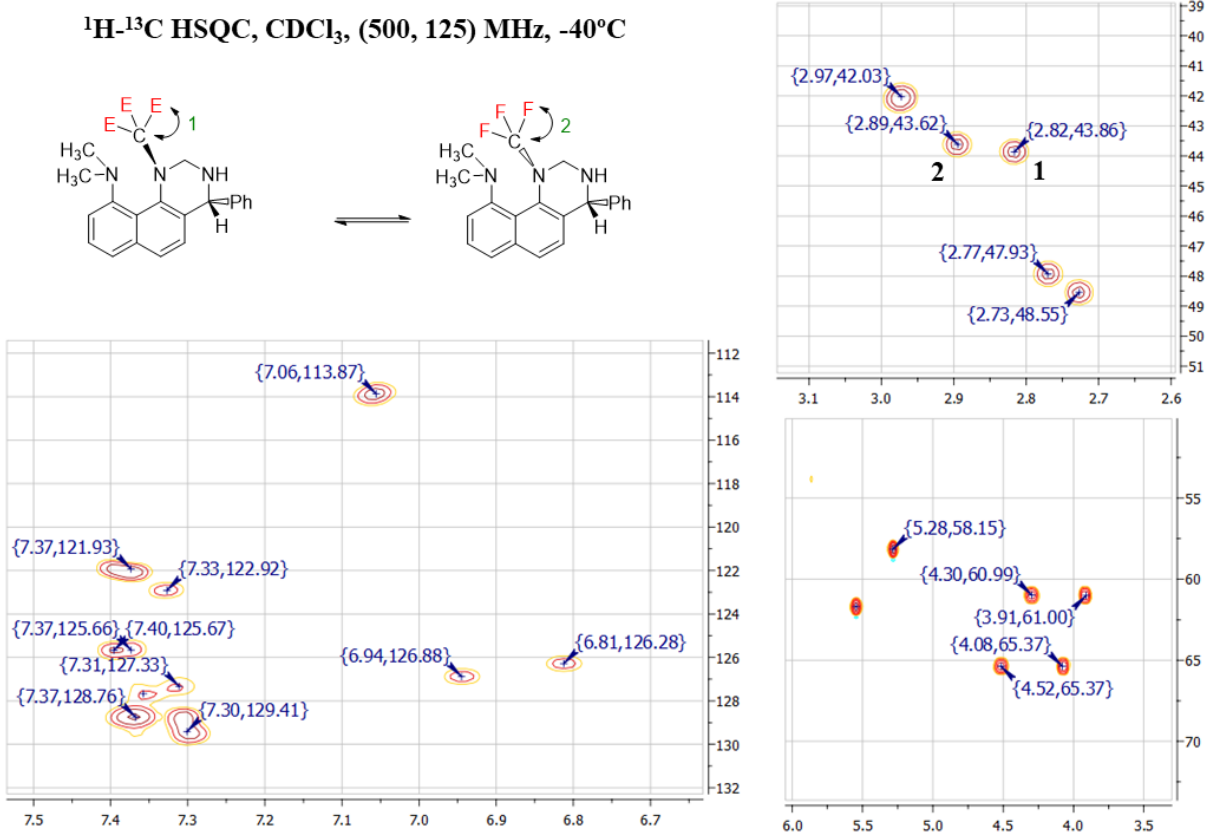

**Figure S42.**  $^1\text{H}$ - $^{13}\text{C}$  HSQC NMR spectrum of **8a**.



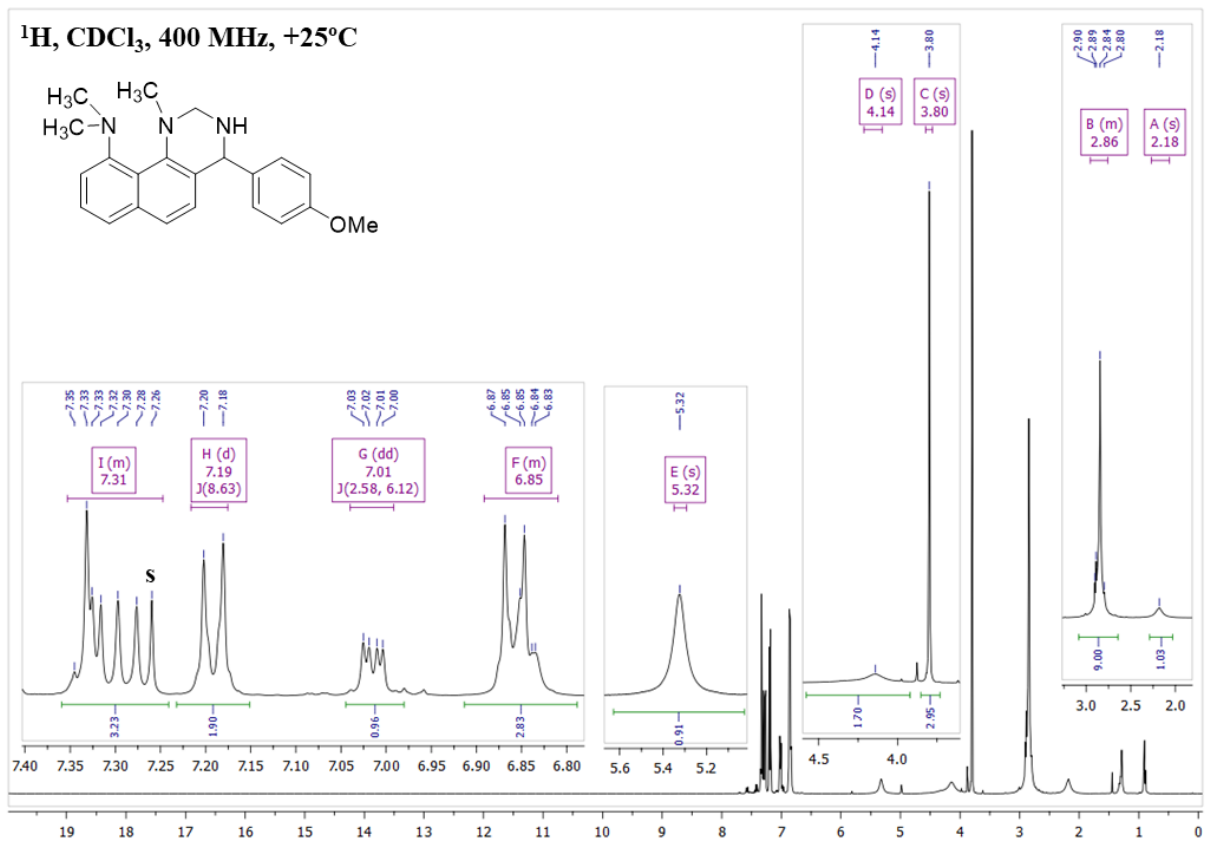

**Figure S43.**  $^1\text{H}$  NMR spectrum of **8b**.

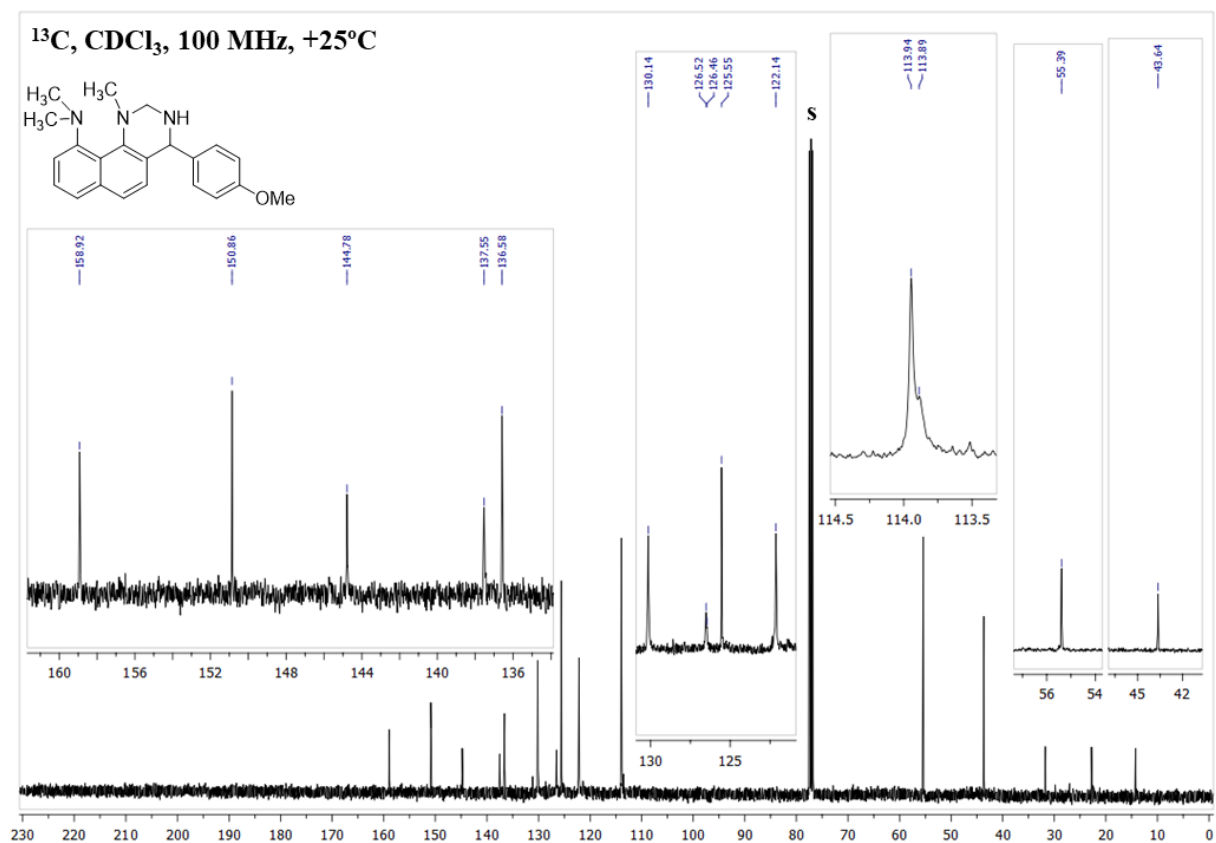

**Figure S44.**  $^{13}\text{C}$  NMR spectrum of **8b**.

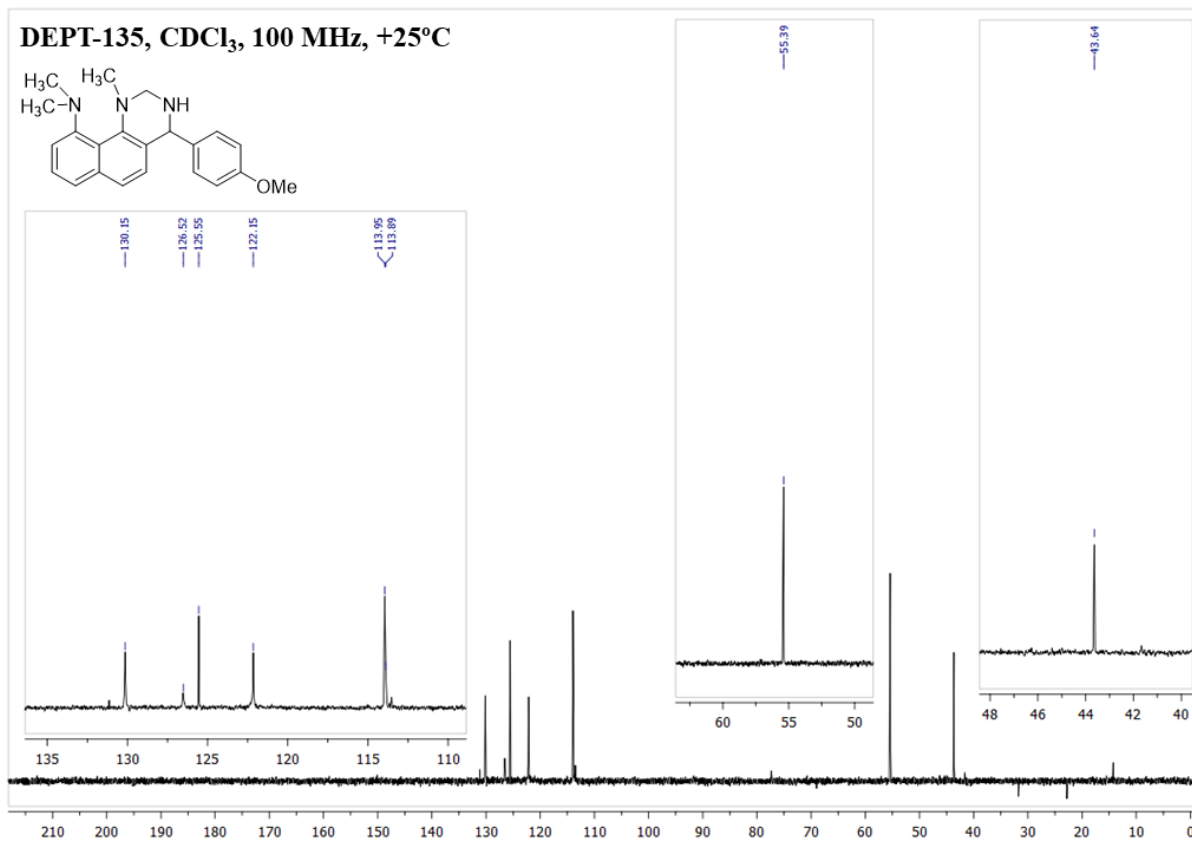

**Figure S45.** <sup>13</sup>C DEPT NMR spectrum of **8b**.

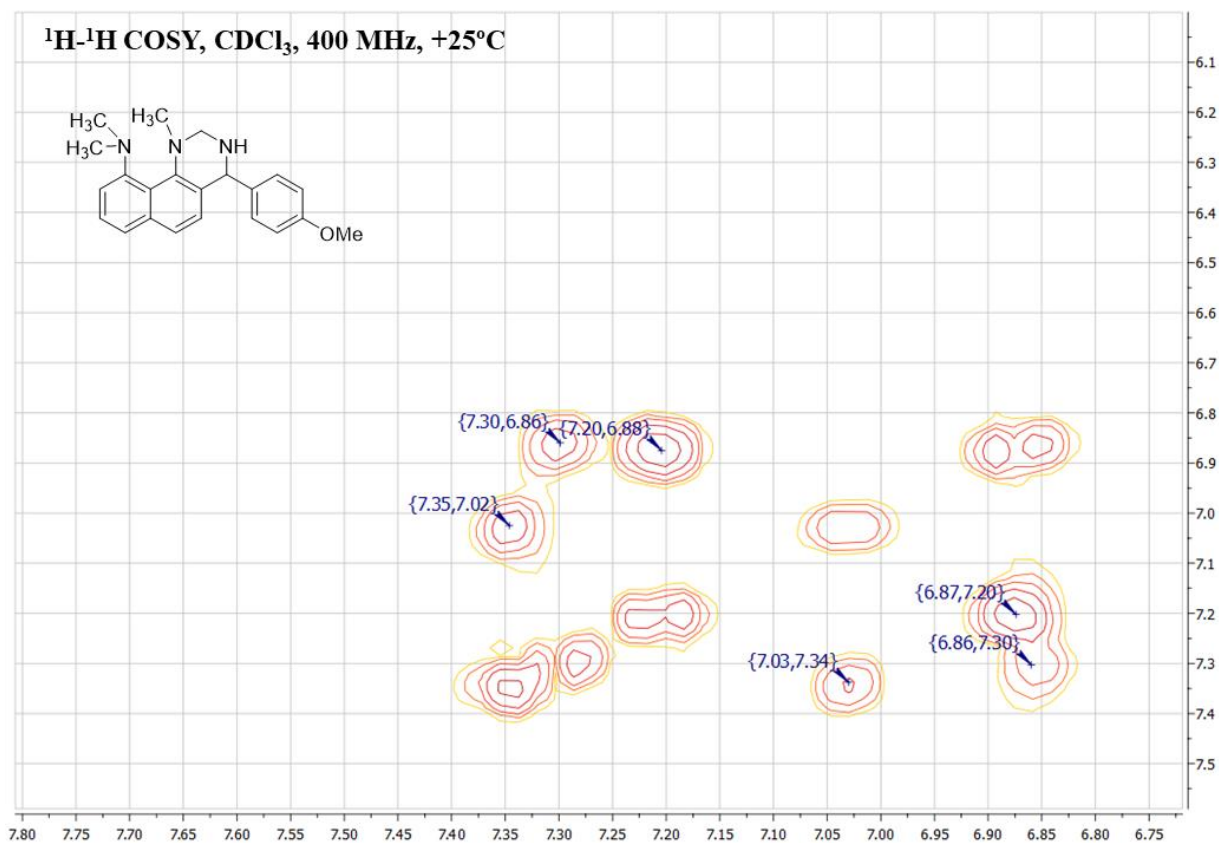

**Figure S46.** <sup>1</sup>H-<sup>1</sup>H COSY NMR spectrum of **8b**.

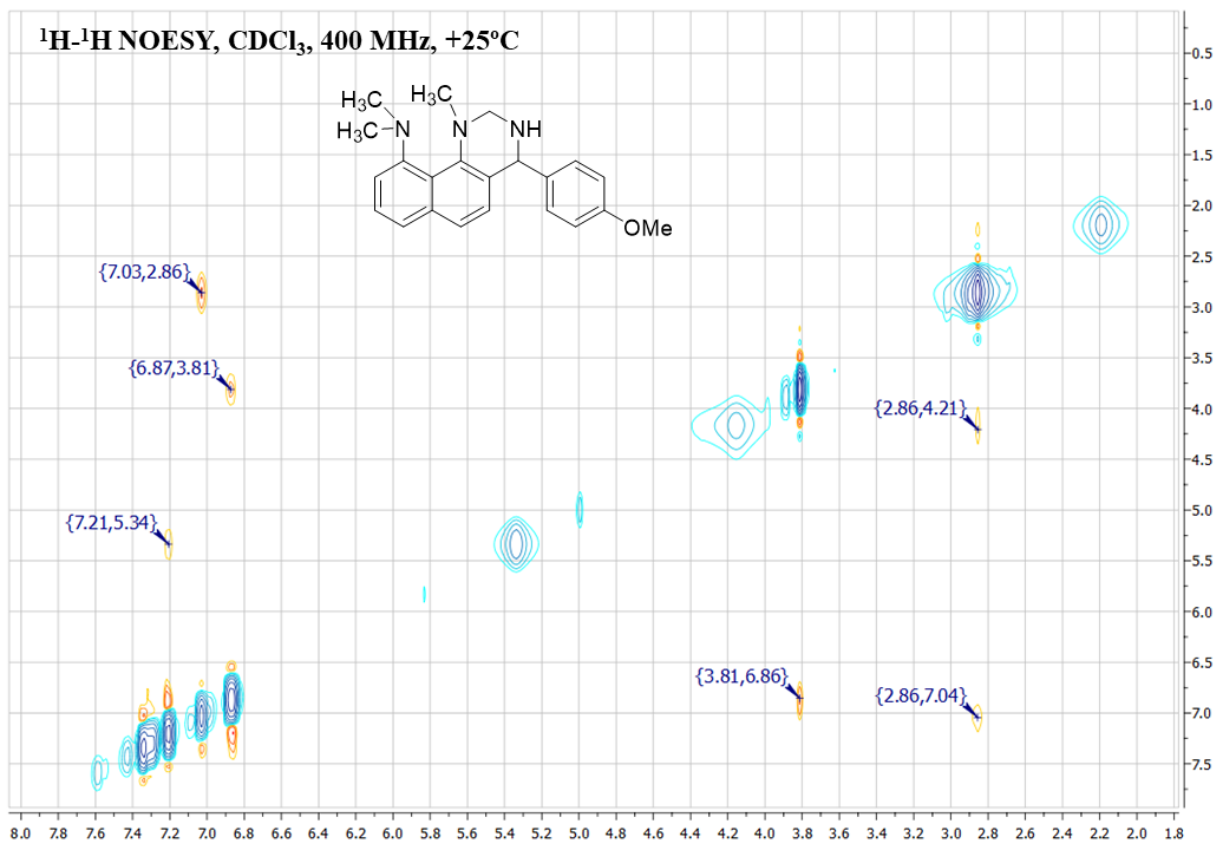

**Figure S47.**  $^1\text{H}$ - $^1\text{H}$  NOESY NMR spectrum of **8b**.

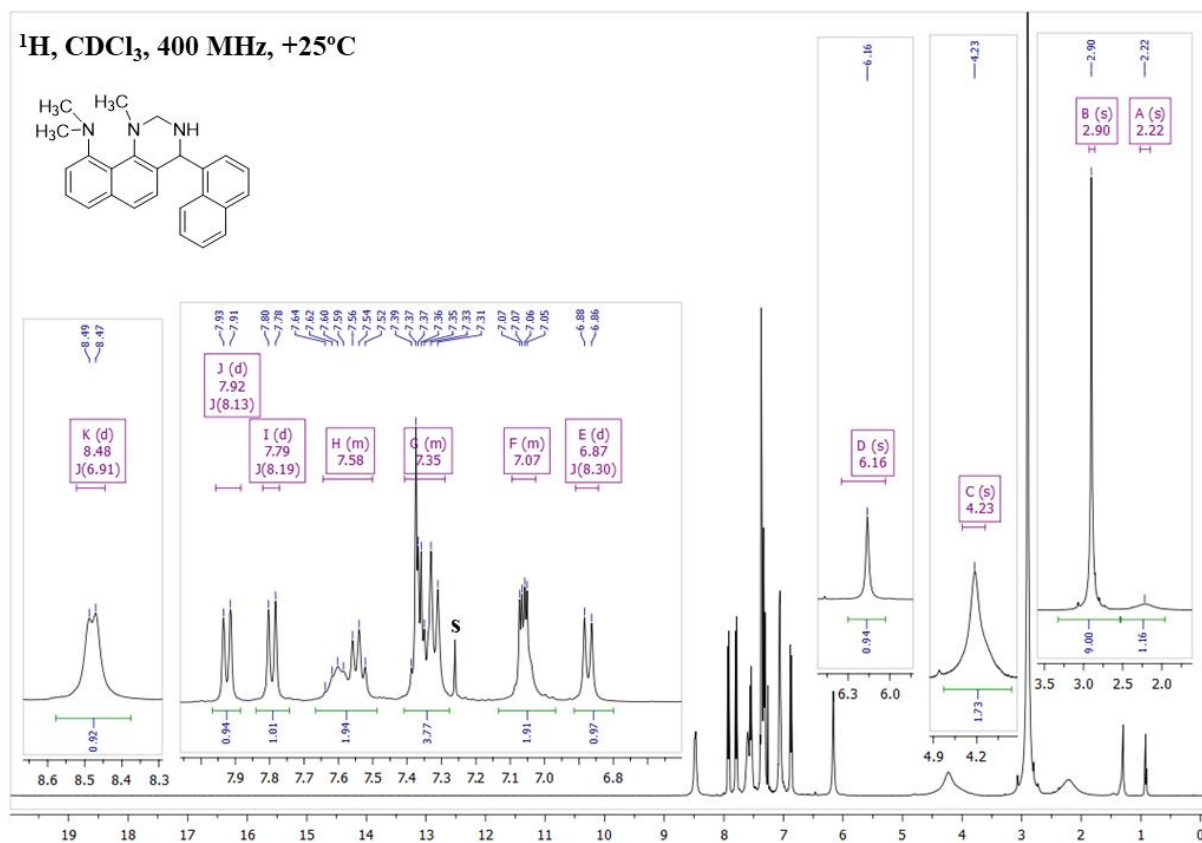

**Figure S48.**  $^1\text{H}$  NMR spectrum of **8c**.

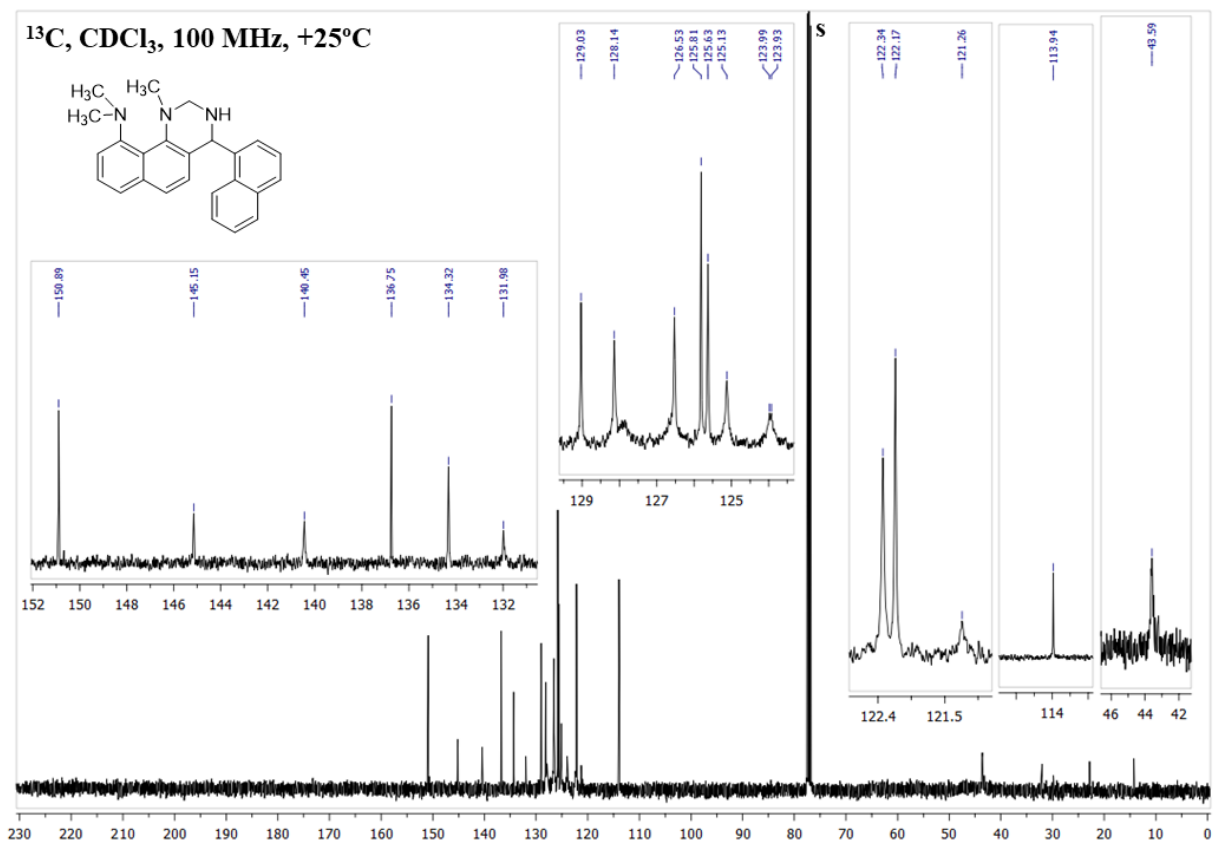

Figure S49.  $^{13}\text{C}$  NMR spectrum of **8c**.

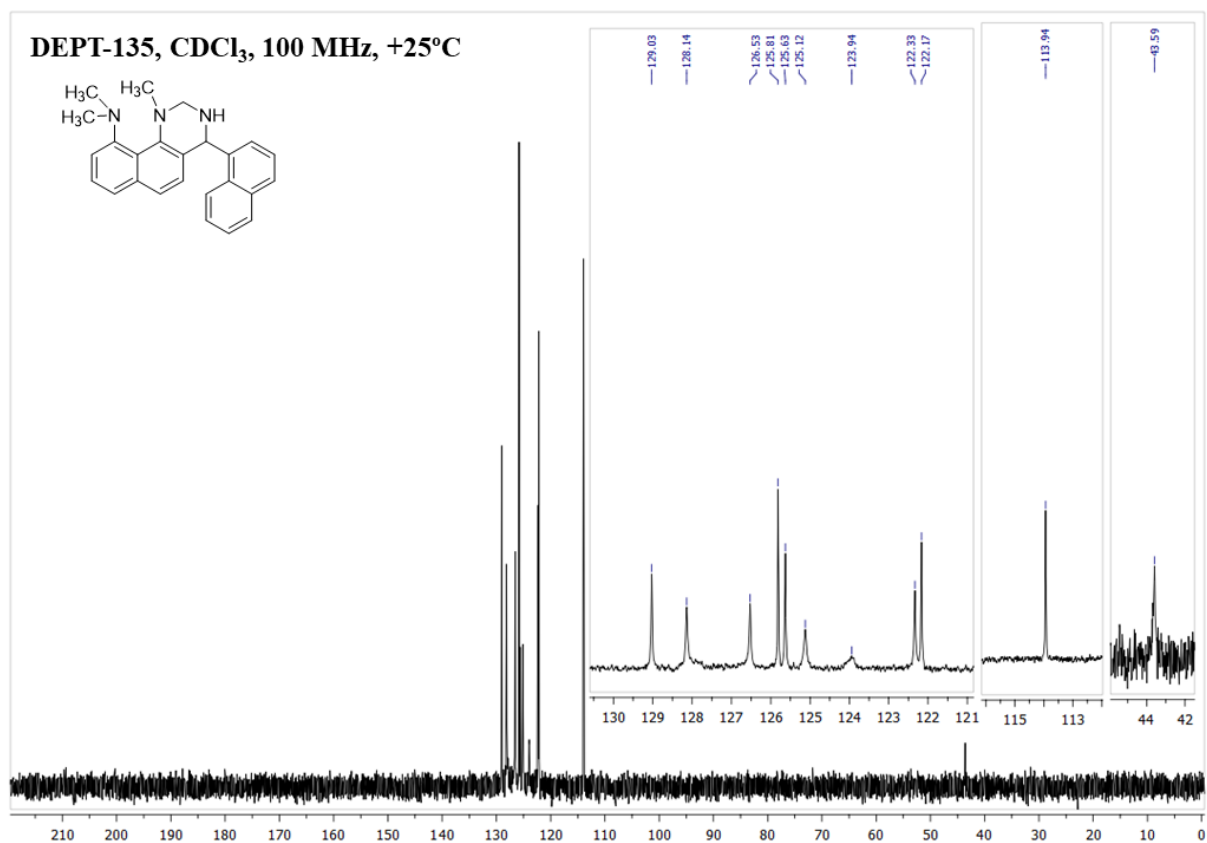

Figure S50.  $^{13}\text{C}$  DEPT NMR spectrum of **8c**.

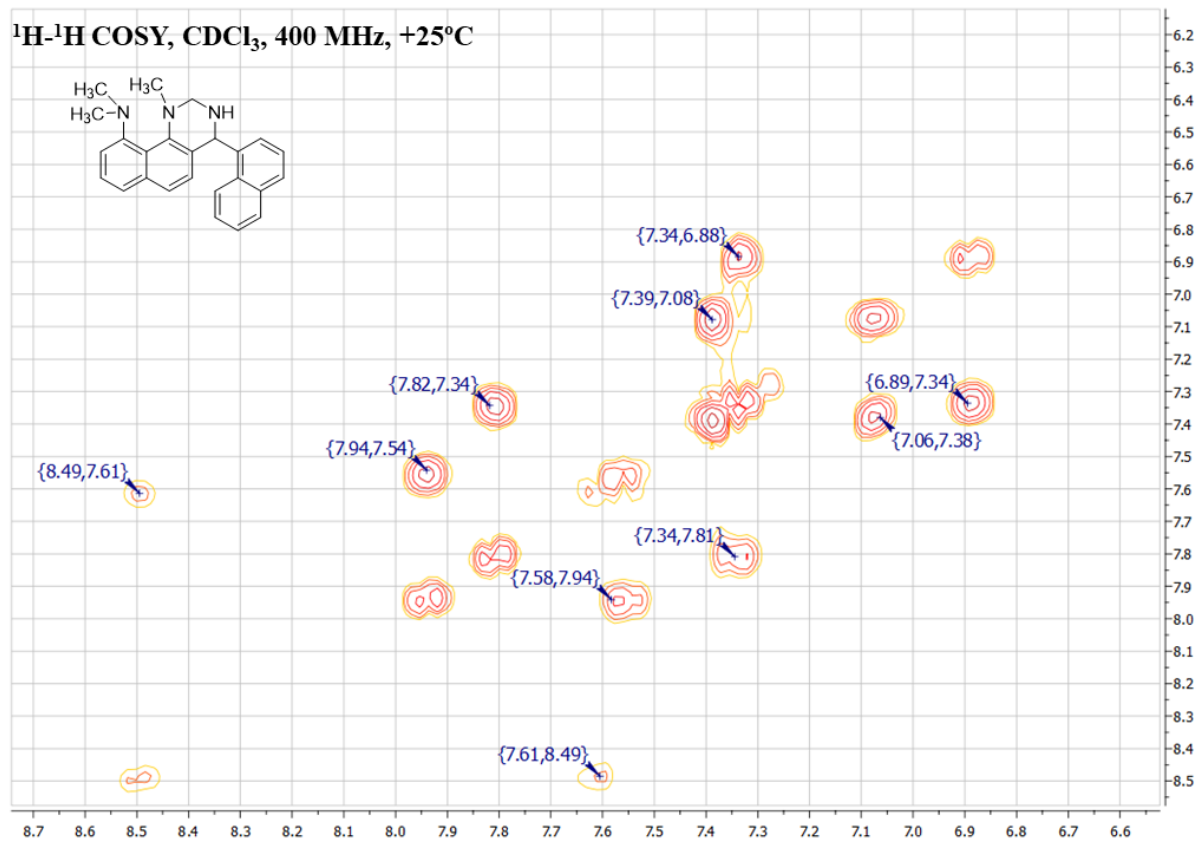

**Figure S51.**  $^1\text{H}$ - $^1\text{H}$  COSY NMR spectrum of **8c**.

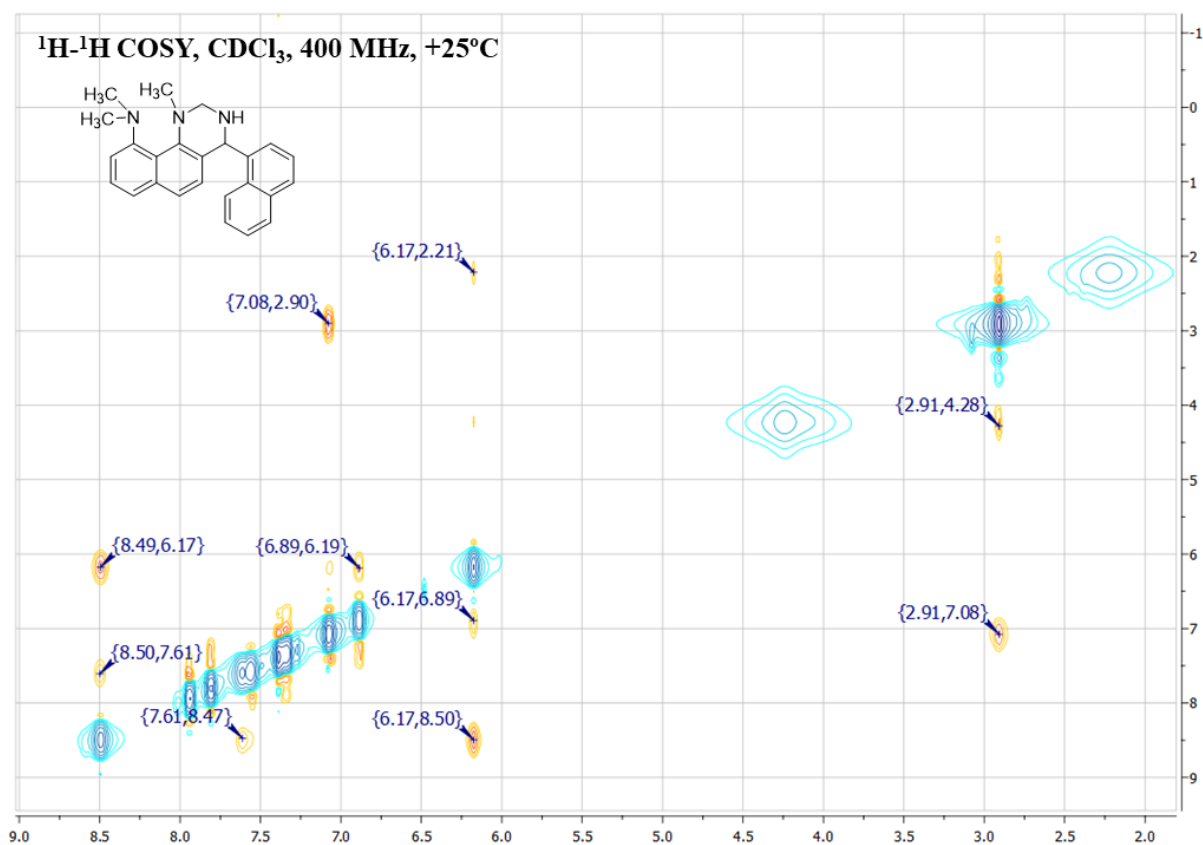

**Figure S52.**  $^1\text{H}$ - $^1\text{H}$  NOESY NMR spectrum of **8c**.

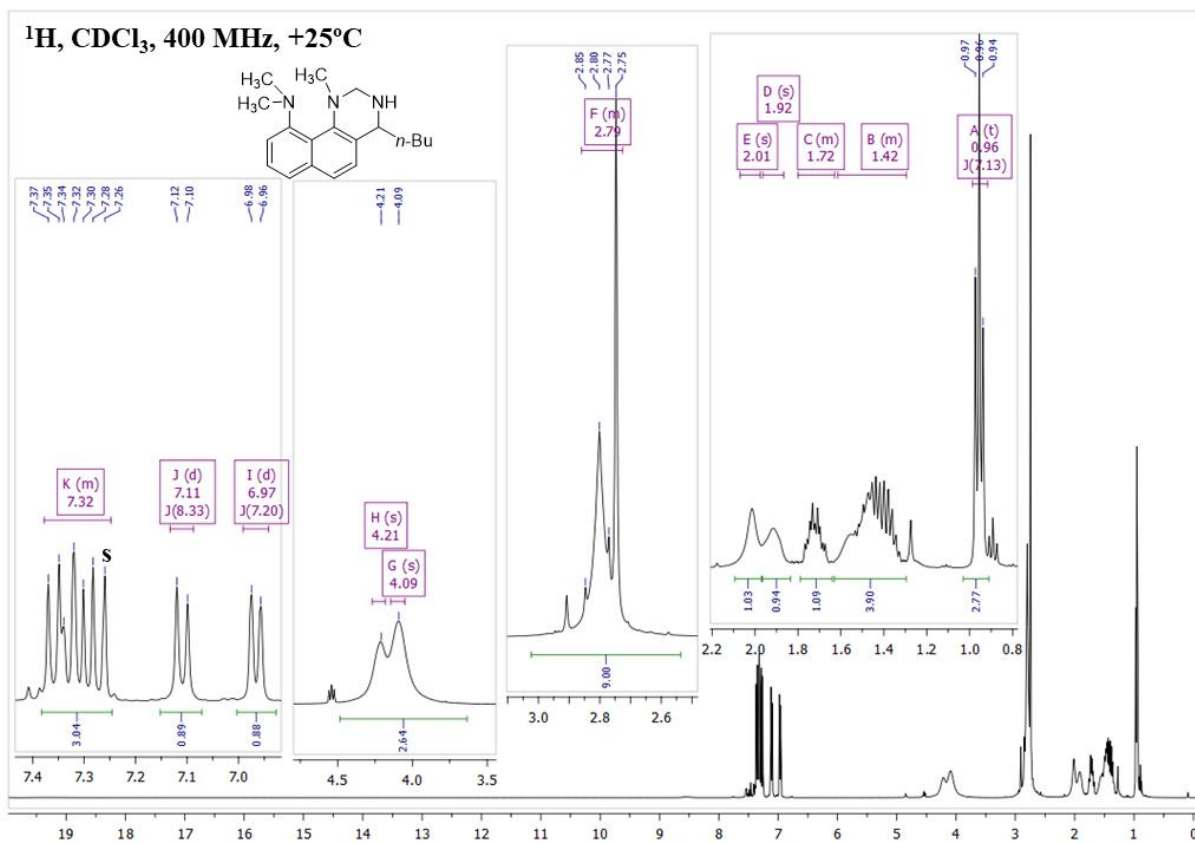

**Figure S53.**  $^1\text{H}$  NMR spectrum of **8d**.

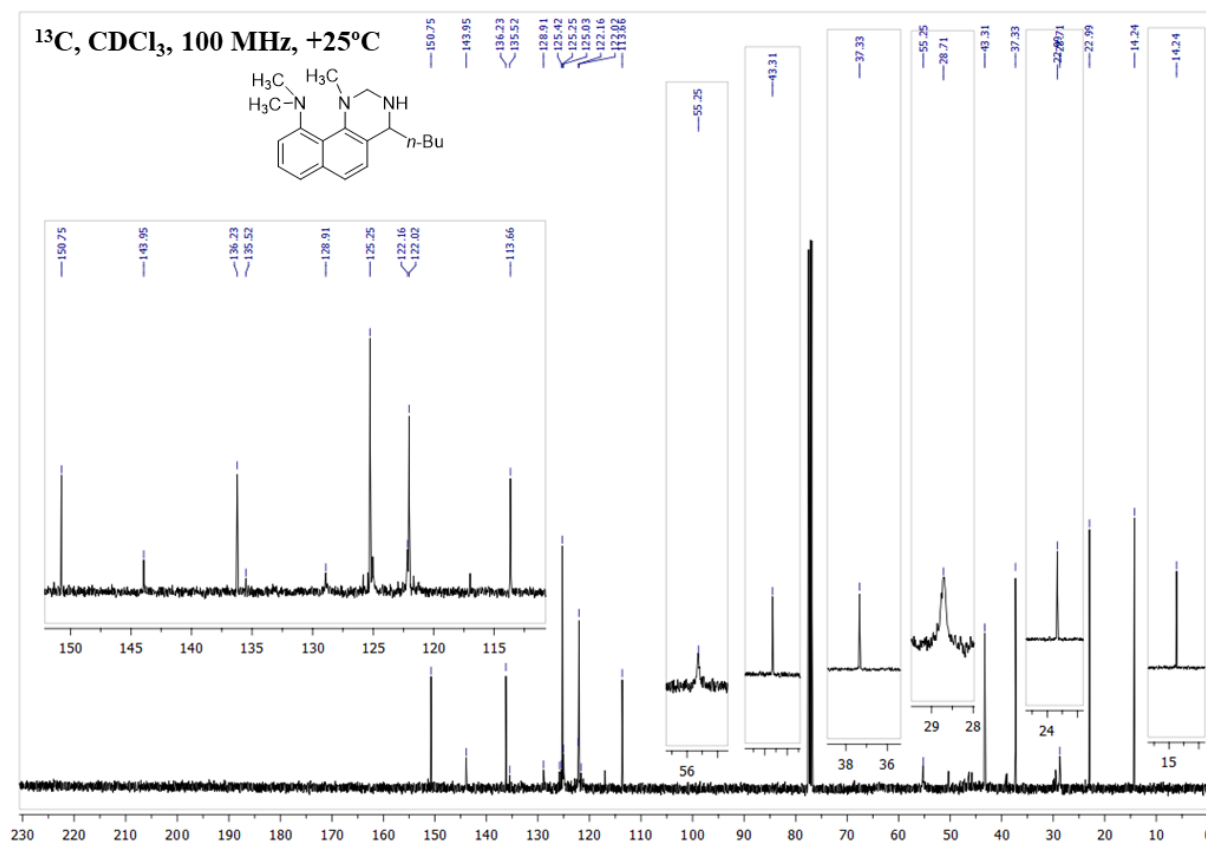

**Figure S54.**  $^{13}\text{C}$  NMR spectrum of **8d**.

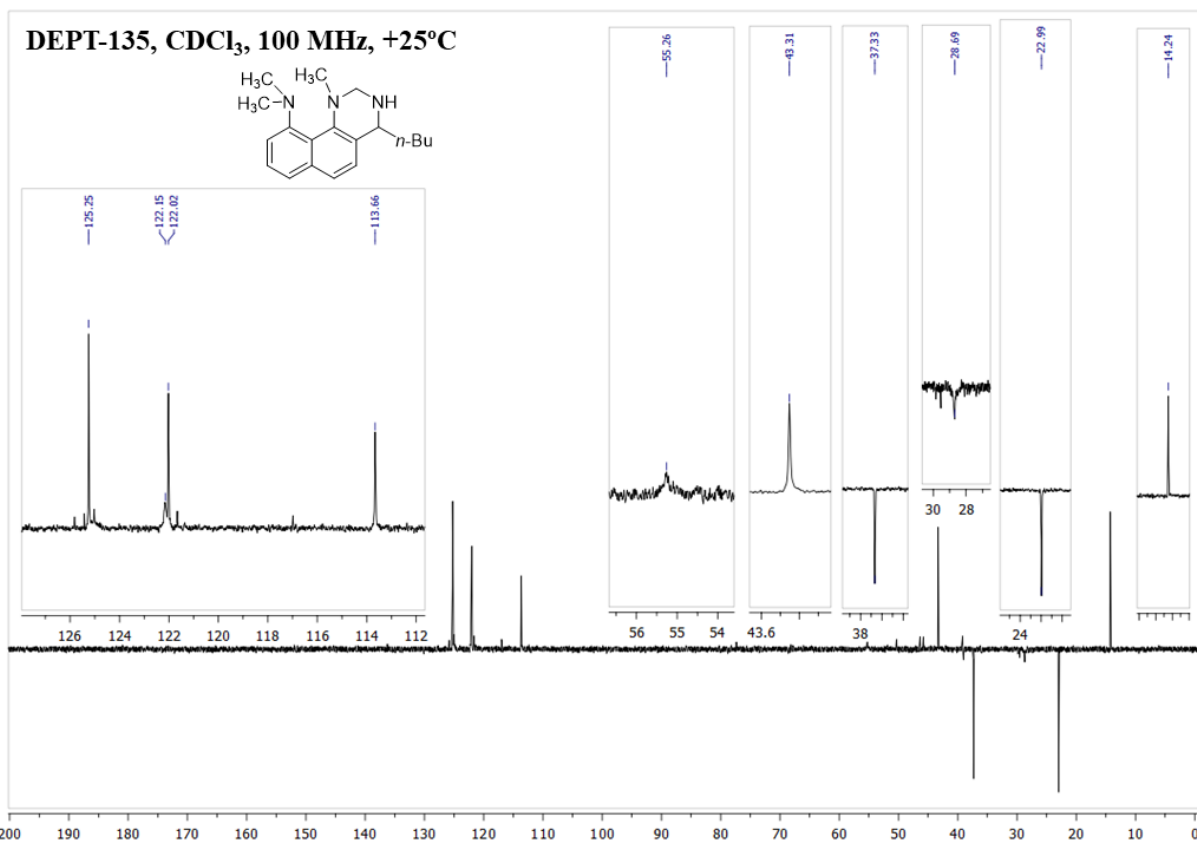

Figure S55. <sup>13</sup>C DEPT NMR spectrum of 8d.

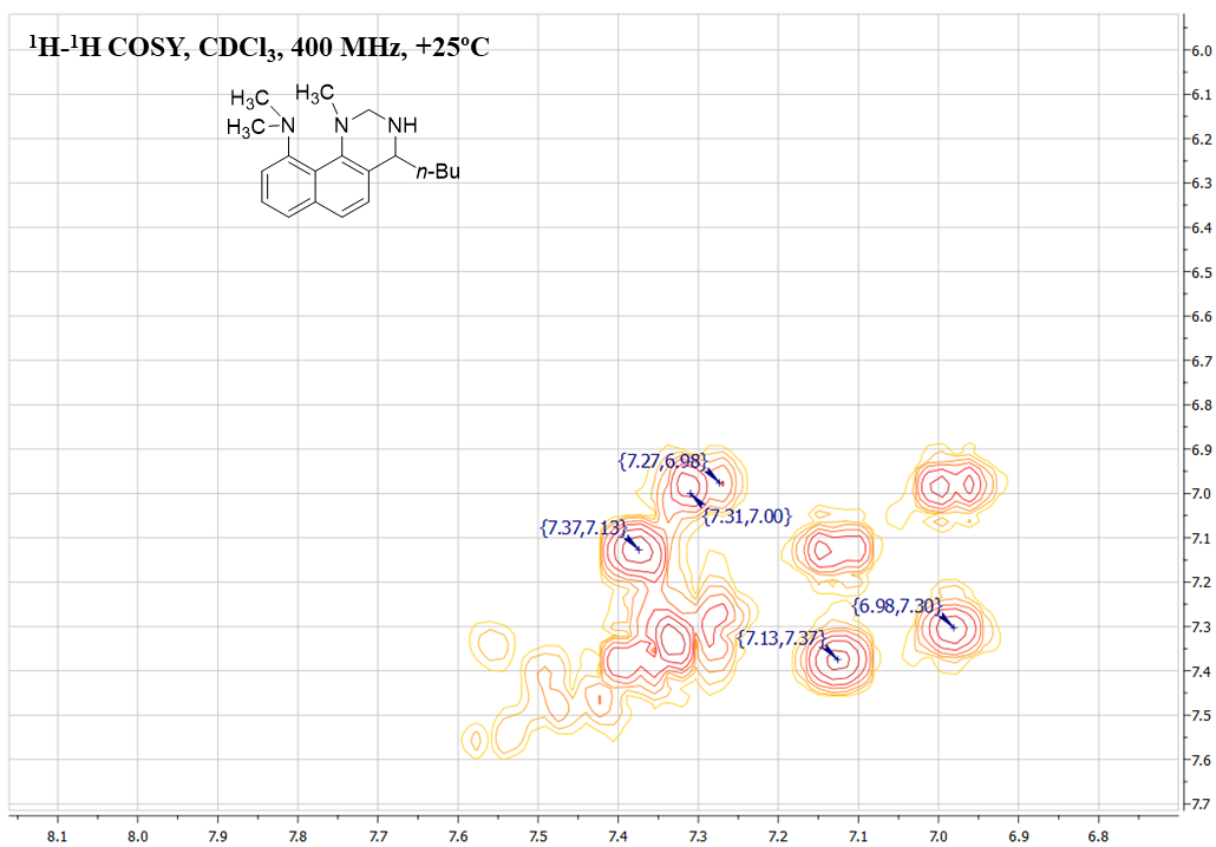

Figure S56. <sup>1</sup>H-<sup>1</sup>H COSY NMR spectrum of 8d.

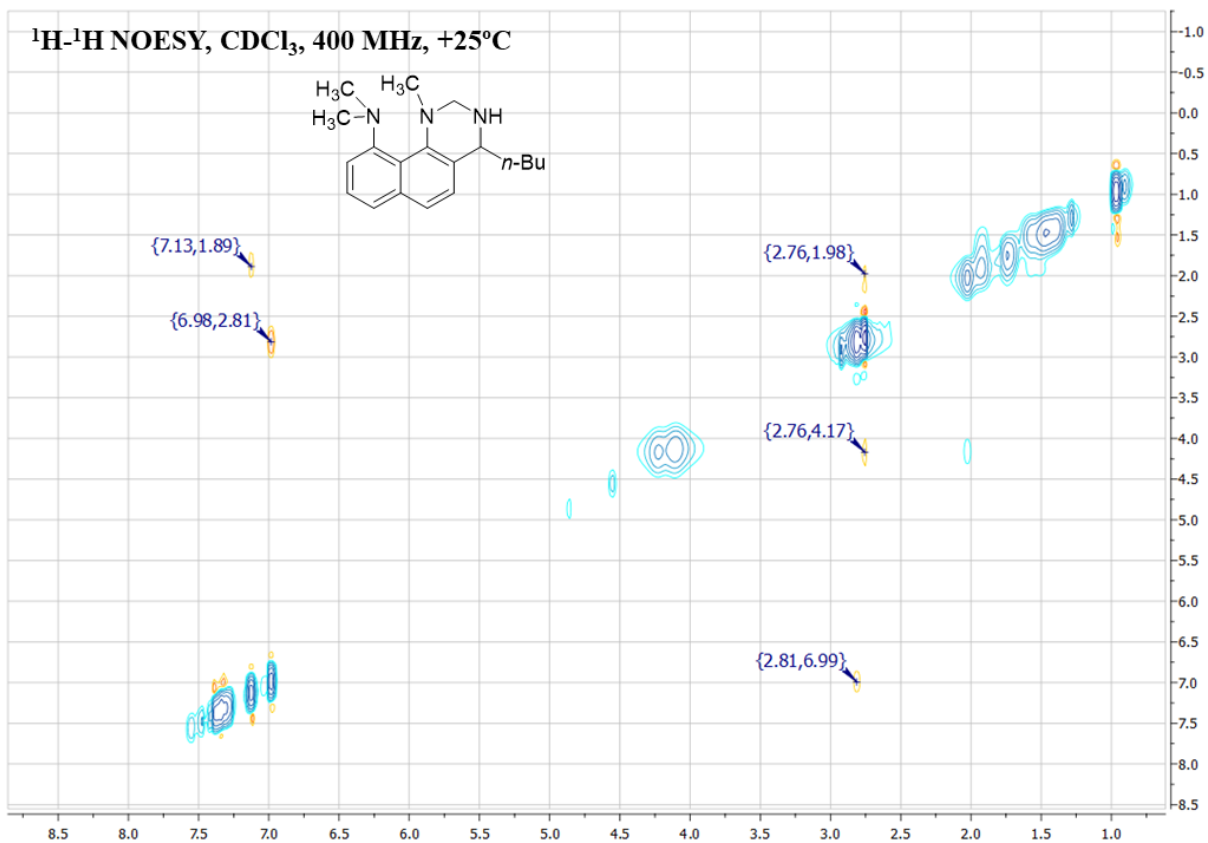

**Figure S57.**  $^1\text{H}$ - $^1\text{H}$  NOESY NMR spectrum of **8d**.

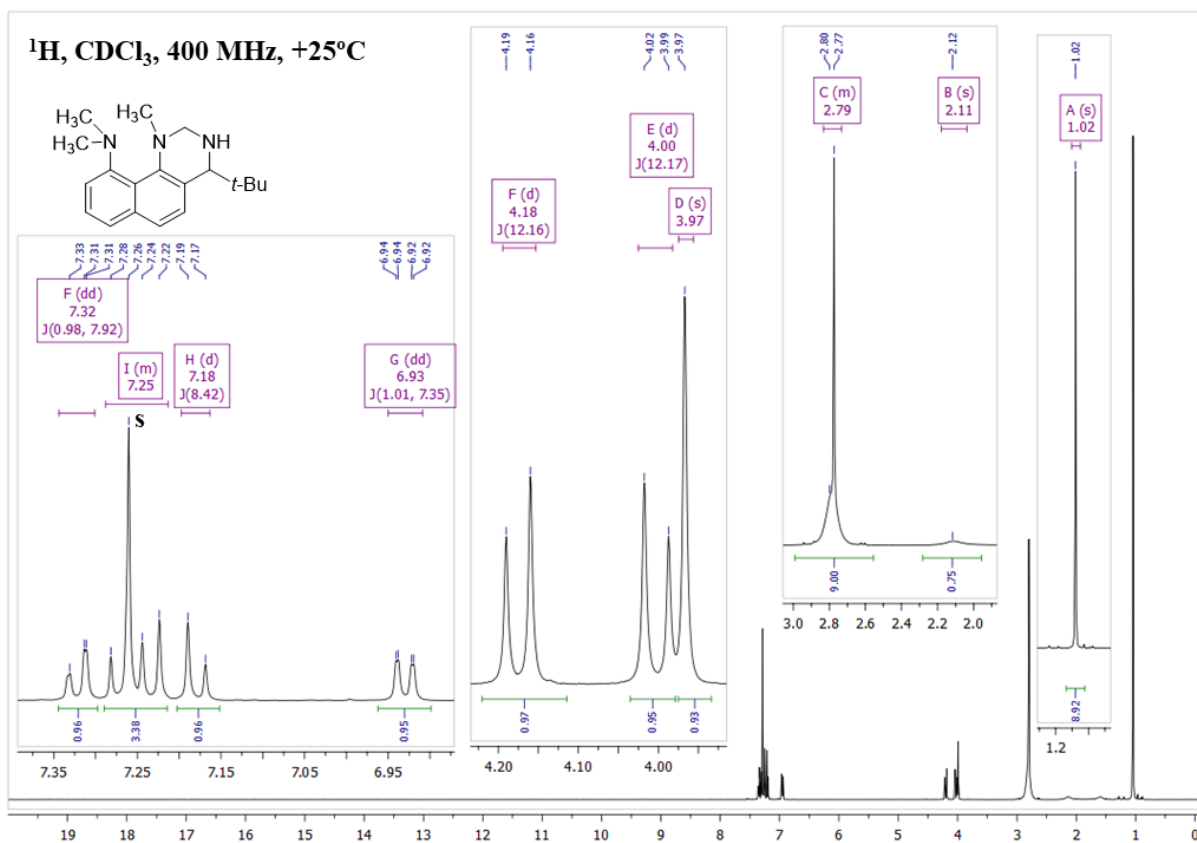

**Figure S58.**  $^1\text{H}$  NMR spectrum of **8e**.



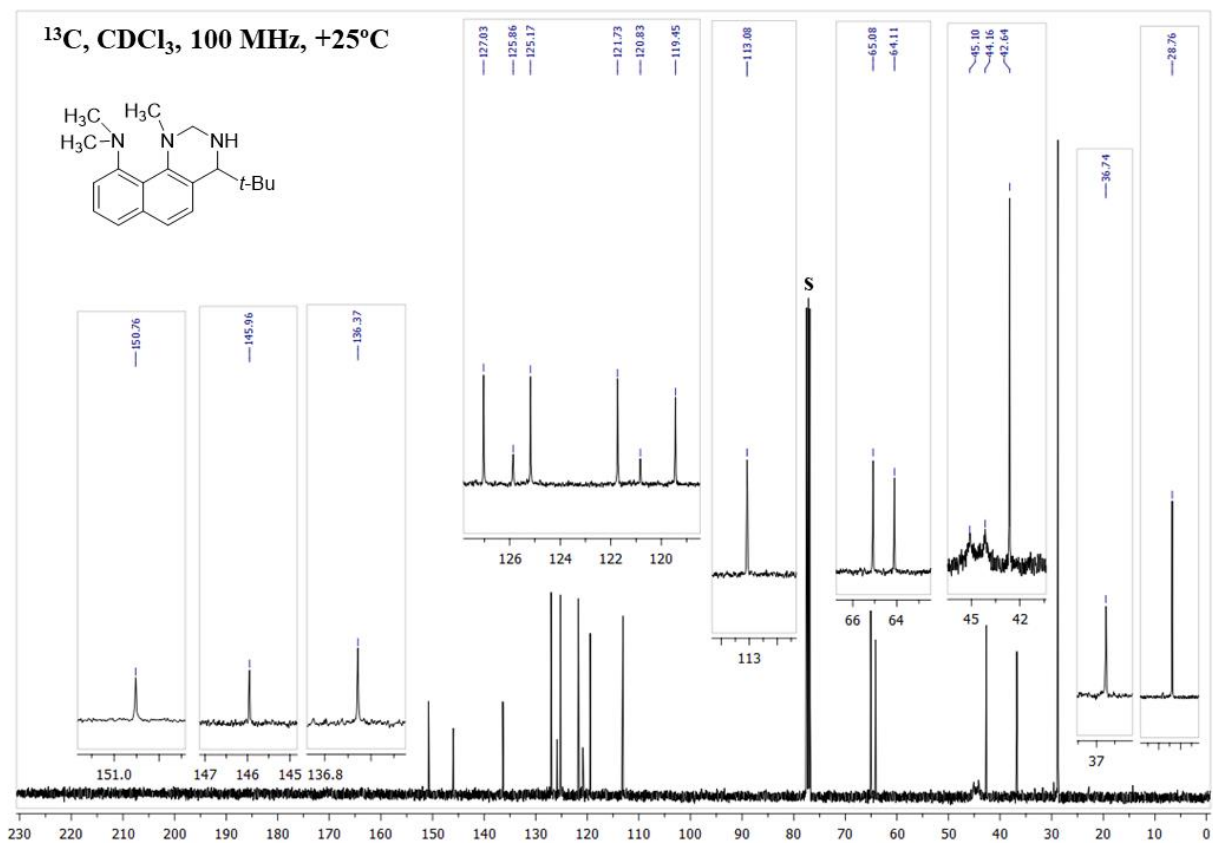

Figure S59.  $^{13}\text{C}$  NMR spectrum of **8e**.

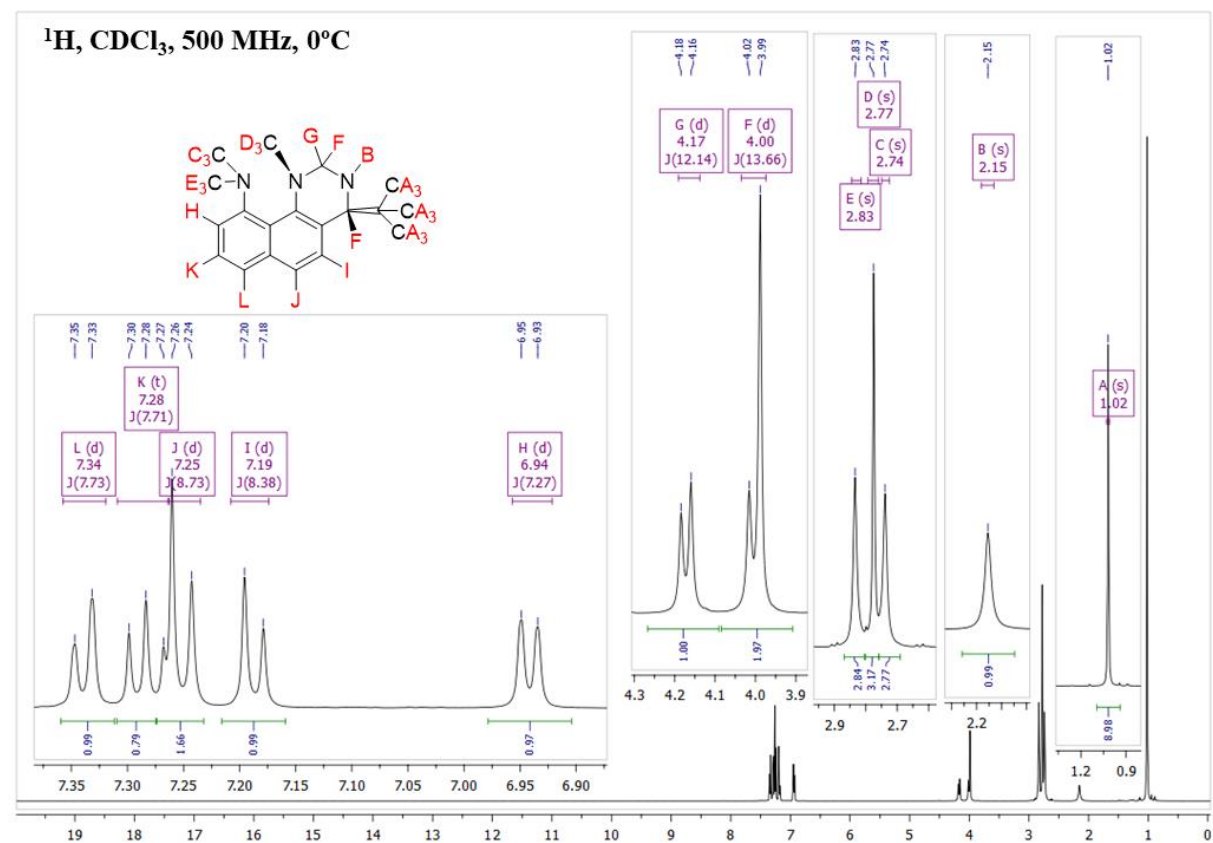

Figure S60.  $^1\text{H}$  NMR spectrum of **8e**.

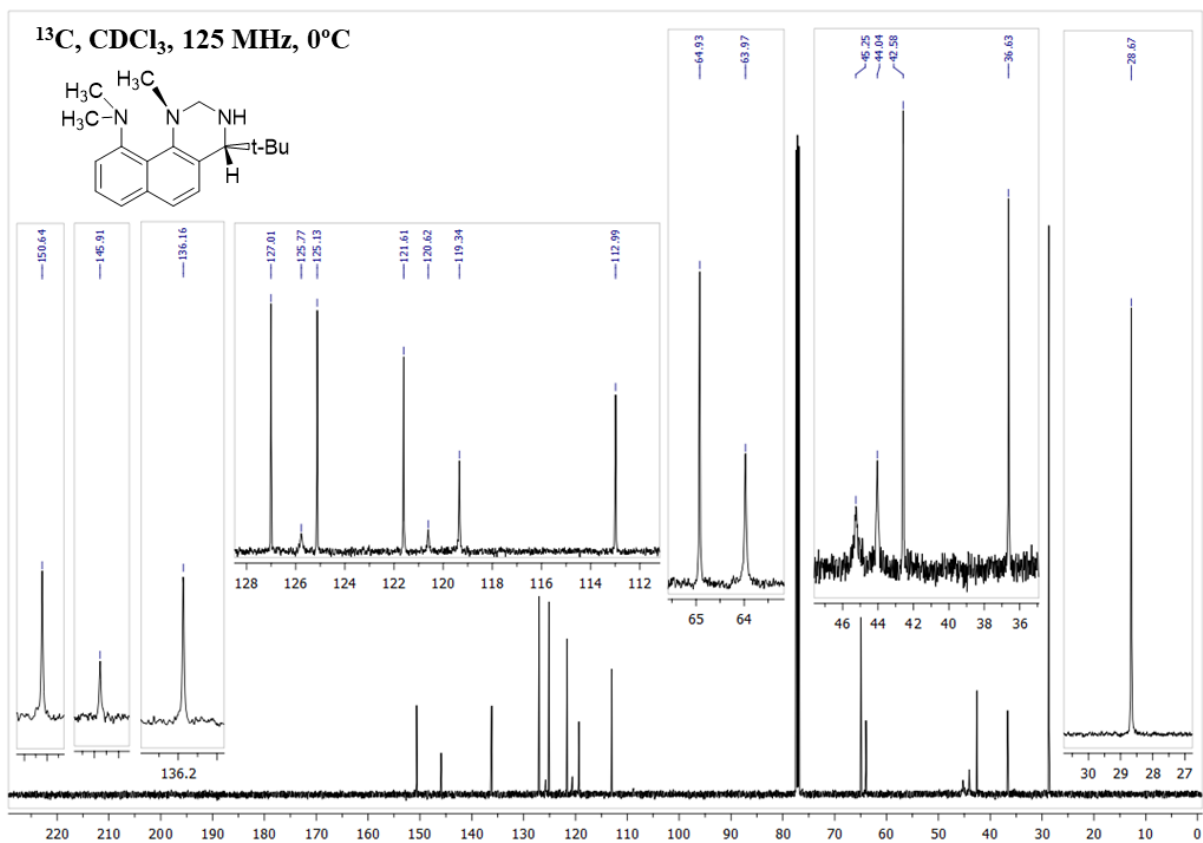

**Figure S61.**  $^{13}\text{C}$  NMR spectrum of **8e**.

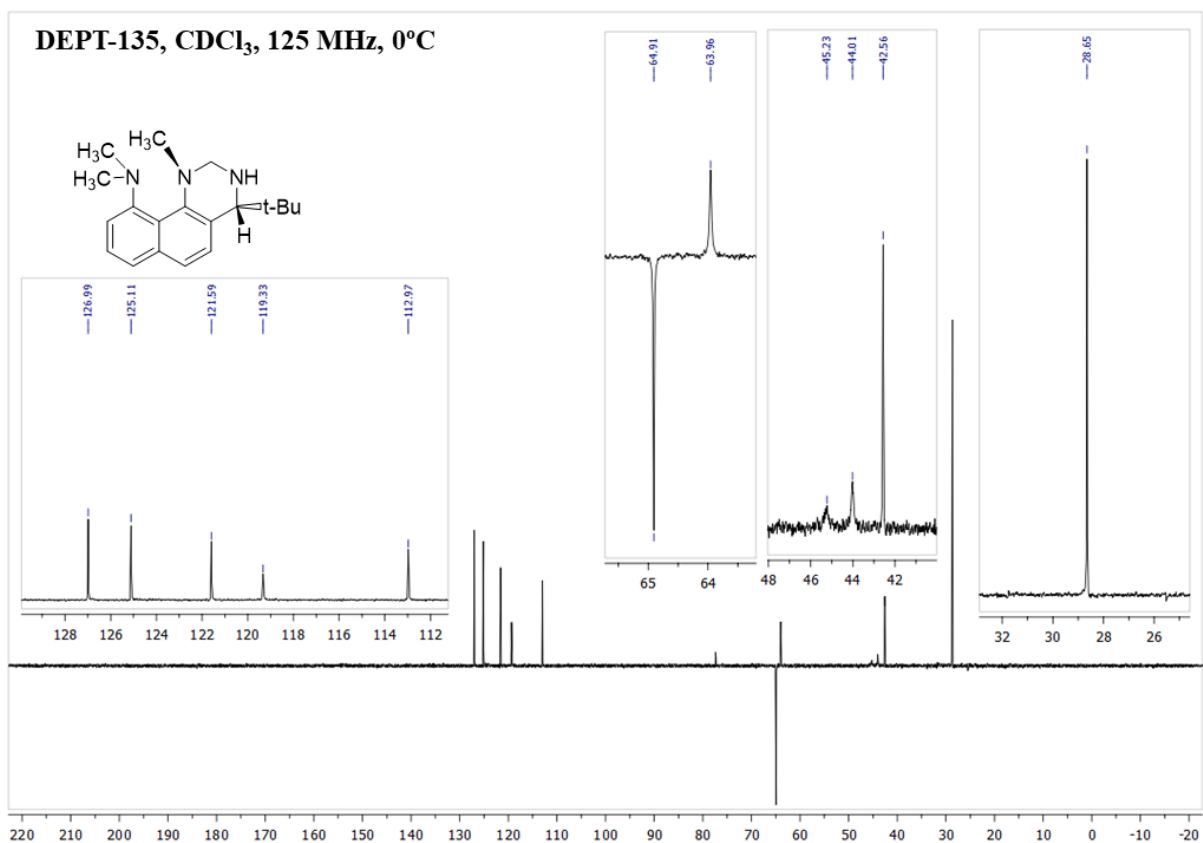

**Figure S62.**  $^{13}\text{C}$  DEPT NMR spectrum of **8e**.

$^1\text{H}$ - $^1\text{H}$  COSY,  $\text{CDCl}_3$ , 500 MHz,  $0^\circ\text{C}$

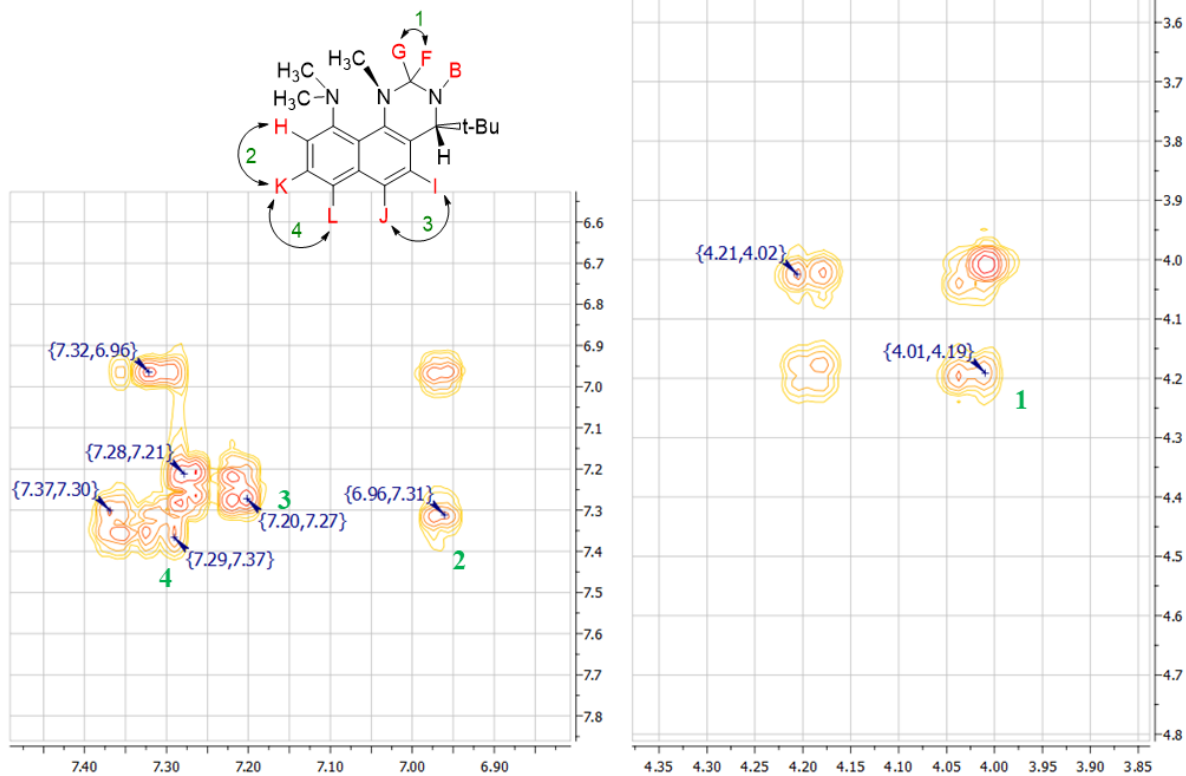

Figure S63.  $^1\text{H}$ - $^1\text{H}$  COSY NMR spectrum of **8e**.

$^1\text{H}$ - $^1\text{H}$  NOESY,  $\text{CDCl}_3$ , 500 MHz,  $0^\circ\text{C}$

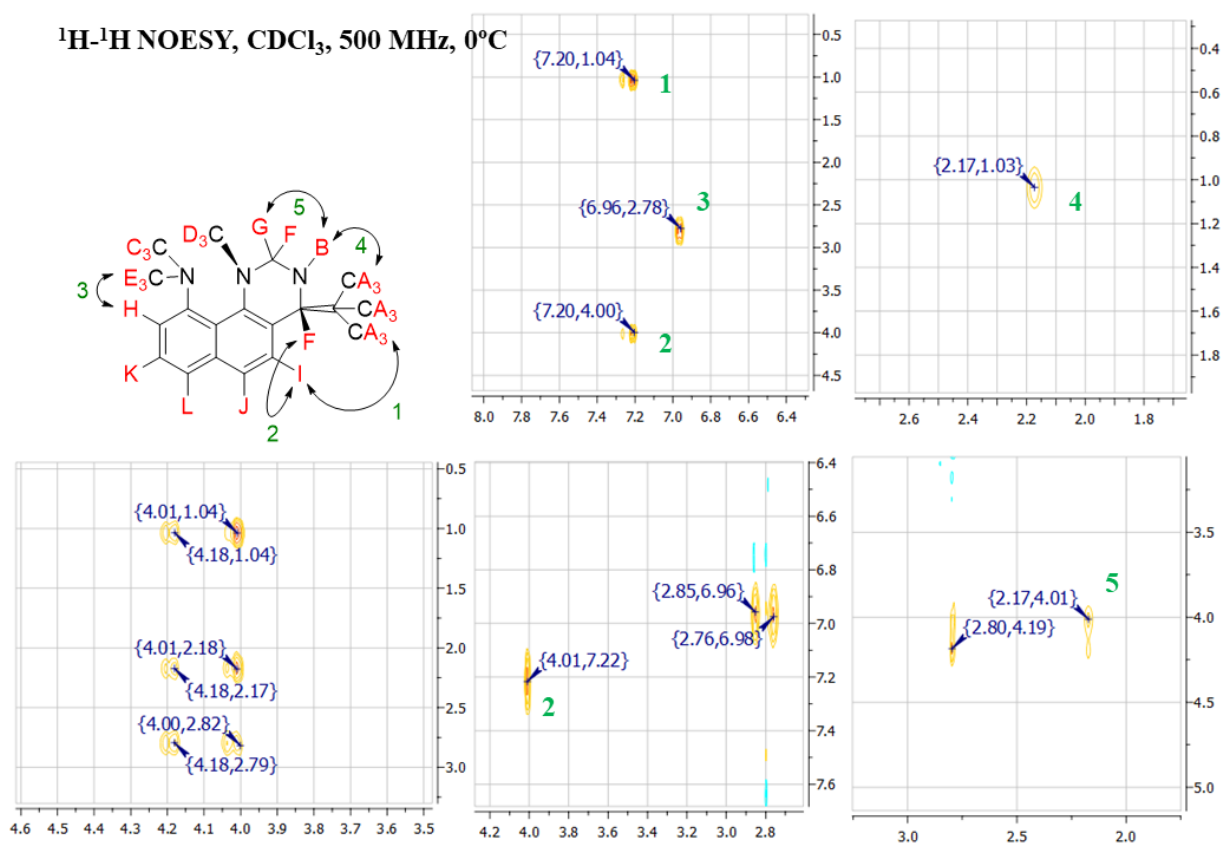

Figure S64.  $^1\text{H}$ - $^1\text{H}$  NOESY NMR spectrum of **8e**.

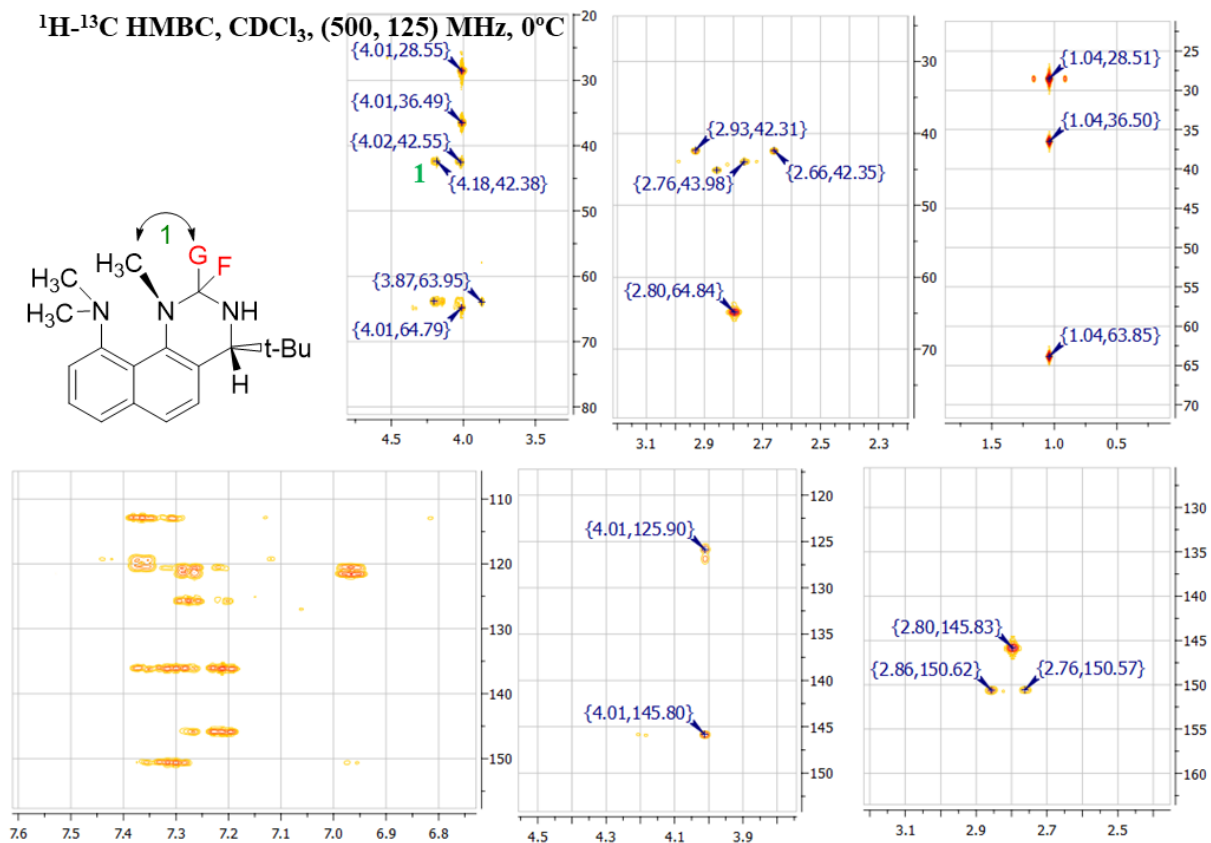

**Figure S65.**  $^1\text{H}$ - $^{13}\text{C}$  HMBC NMR spectrum of **8e**.

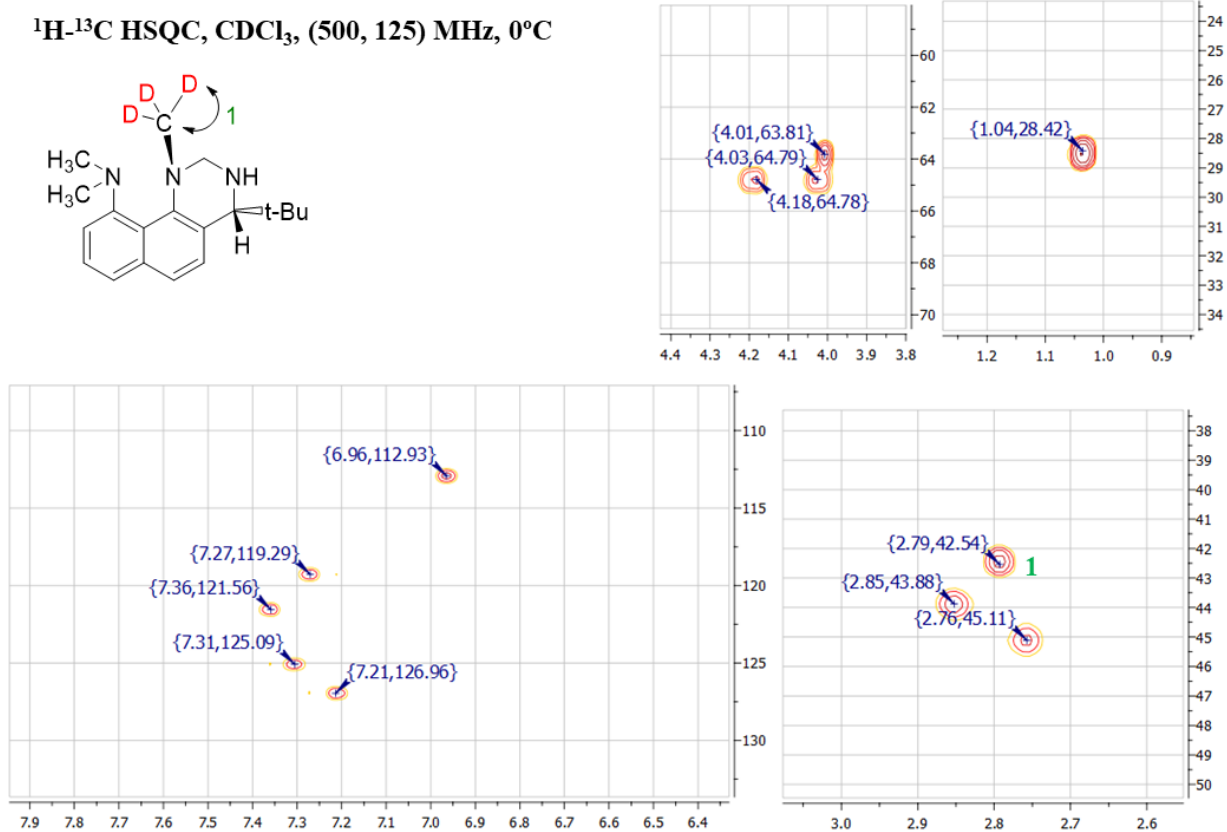

**Figure S66.**  $^1\text{H}$ - $^{13}\text{C}$  HSQC NMR spectrum of **8e**.

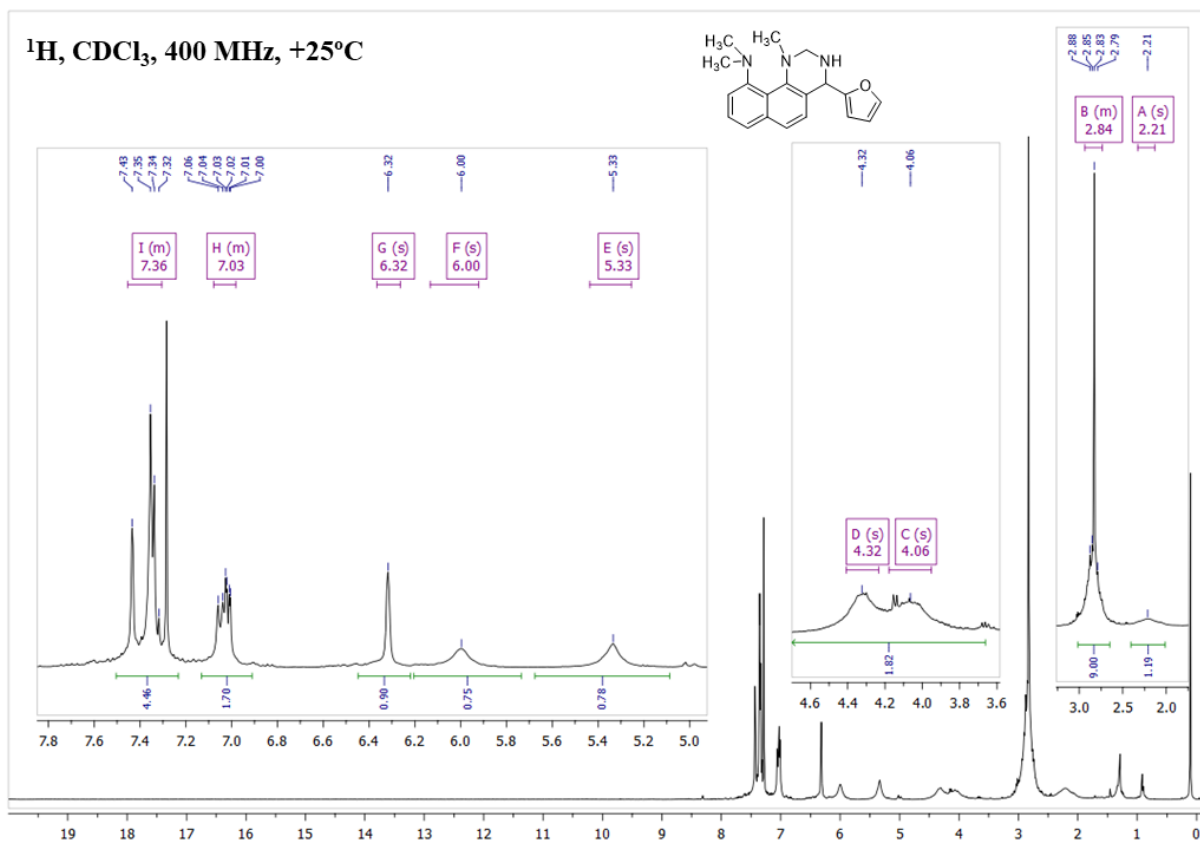

**Figure S67.**  $^1\text{H}$  NMR spectrum of **8f**.

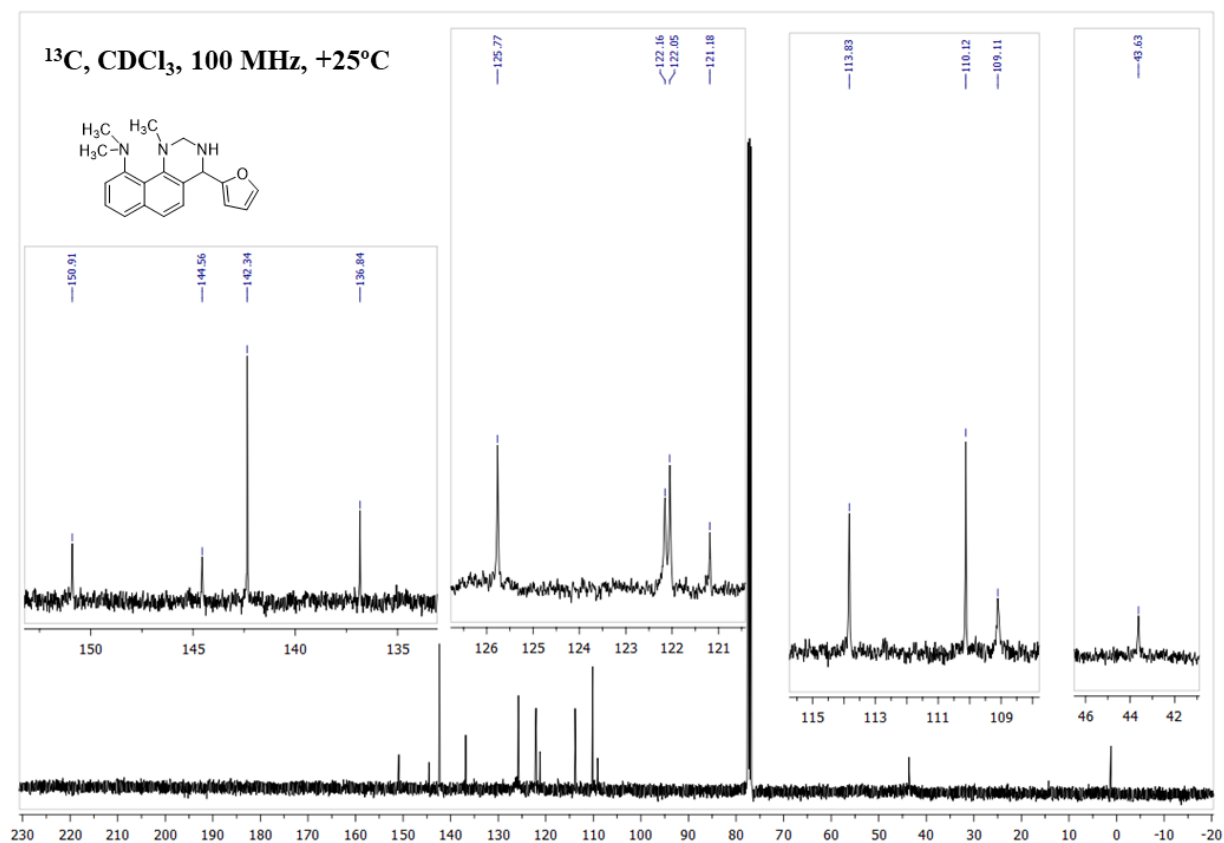

**Figure S68.**  $^{13}\text{C}$  NMR spectrum of **8f**.

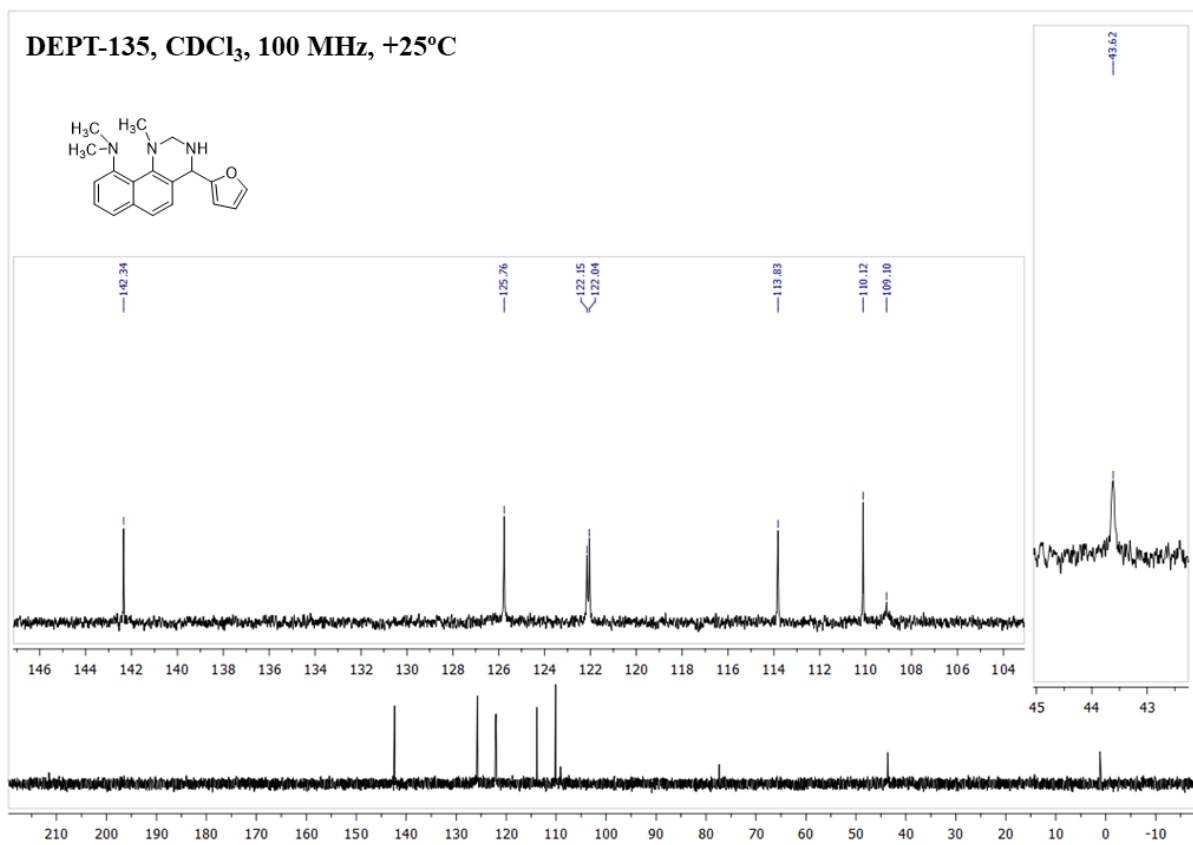

Figure S69. <sup>13</sup>C DEPT NMR spectrum of **8f**.

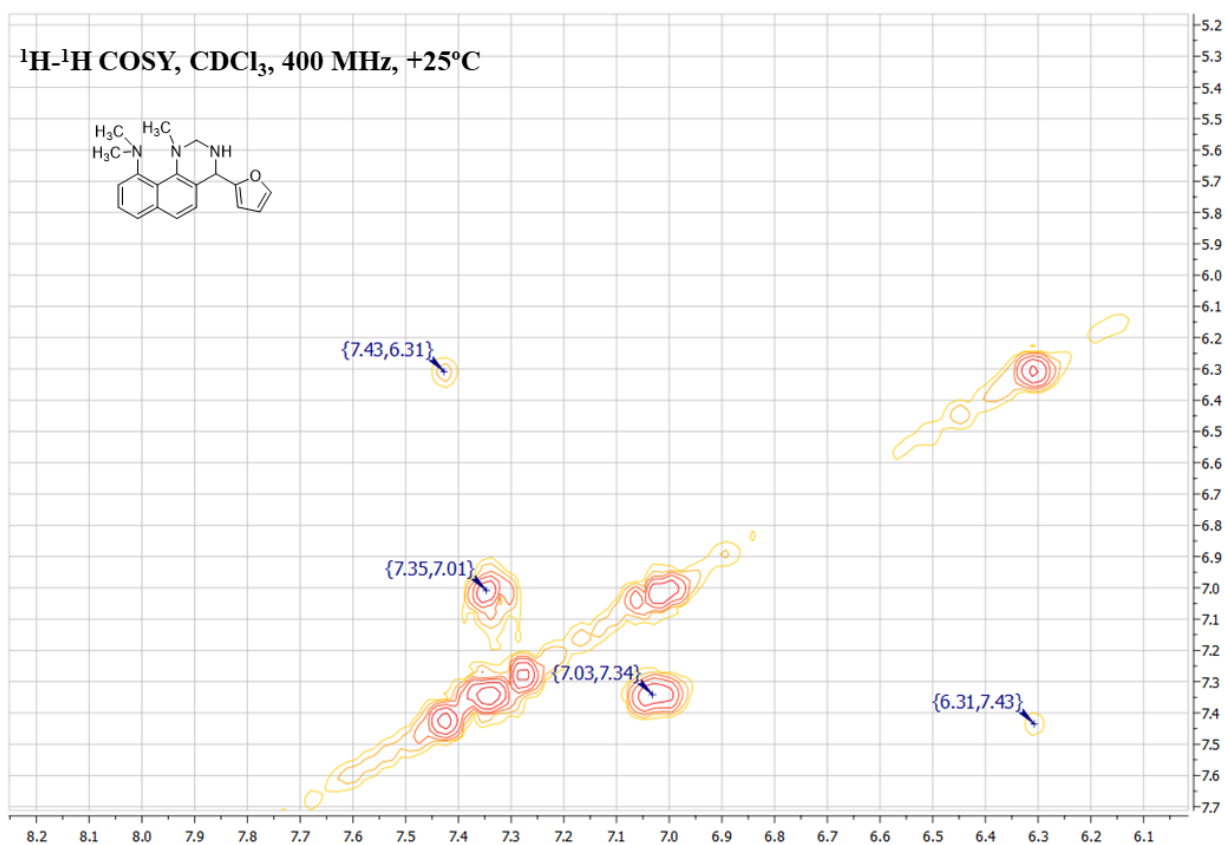

Figure S70. <sup>1</sup>H-<sup>1</sup>H COSY NMR spectrum of **8f**.

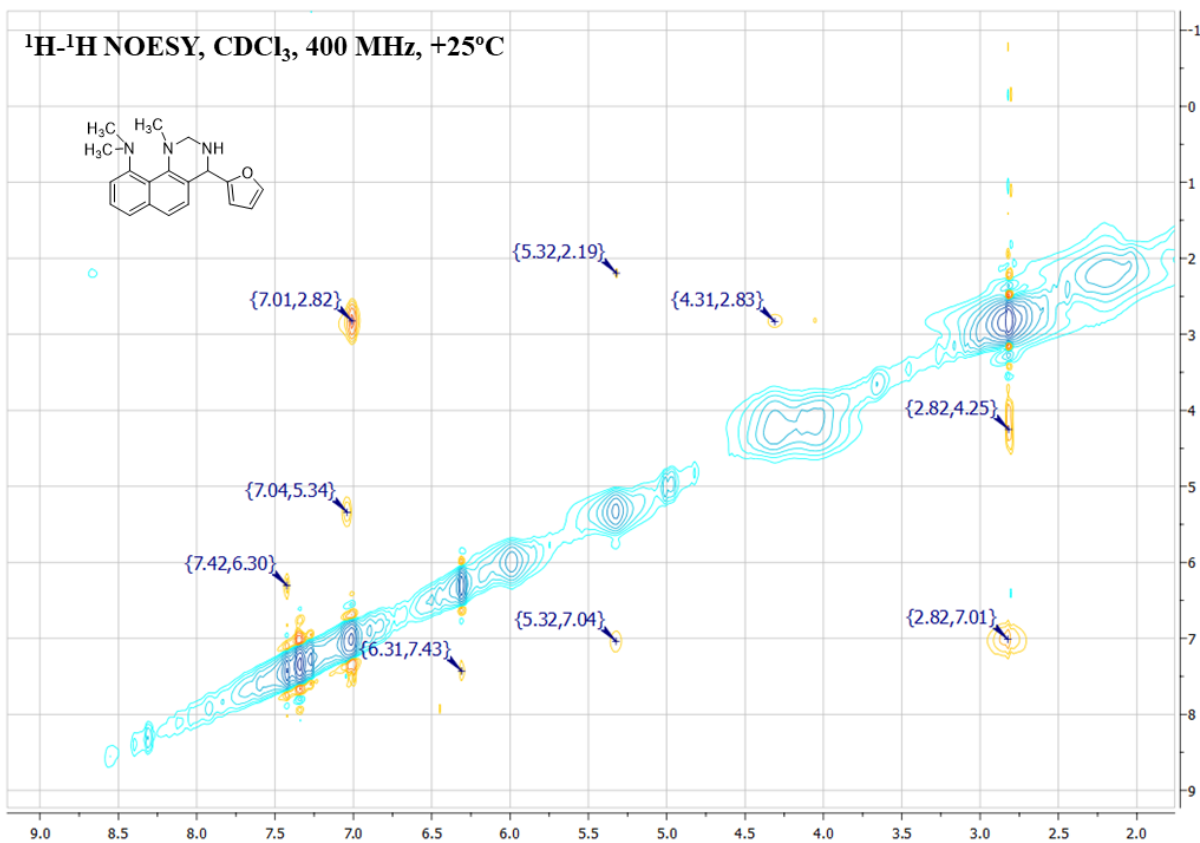

**Figure S71.**  $^1\text{H}$ - $^1\text{H}$  NOESY NMR spectrum of **8f**.

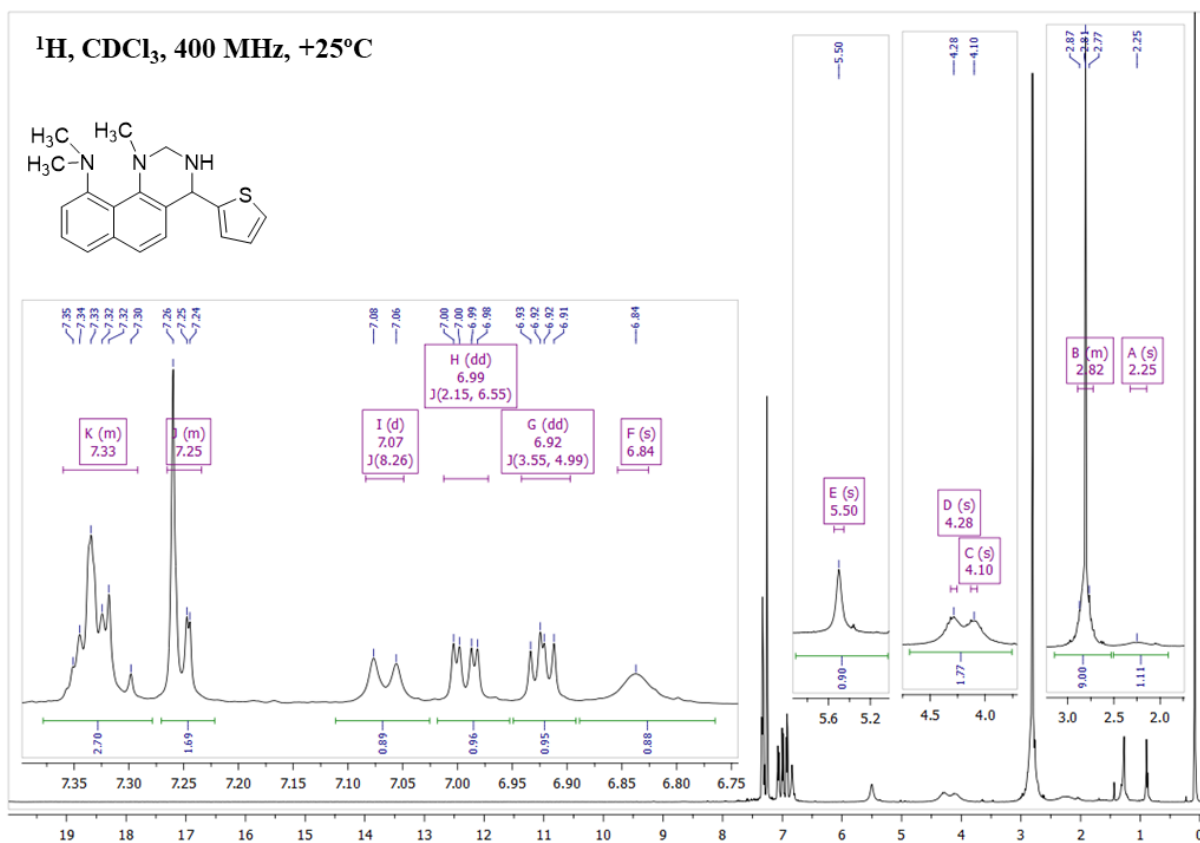

**Figure S72.**  $^1\text{H}$  NMR spectrum of **8g**.

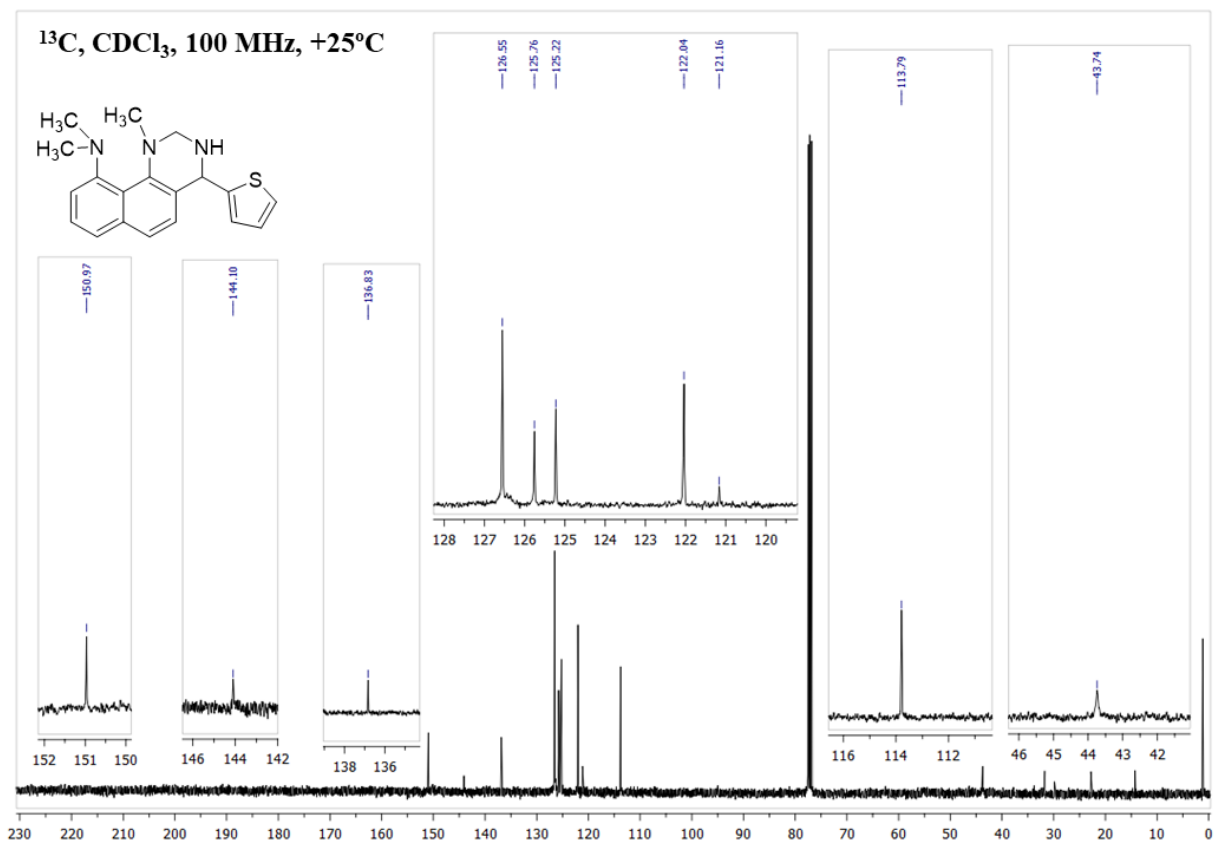

Figure S73.  $^{13}\text{C}$  NMR spectrum of **8g**.

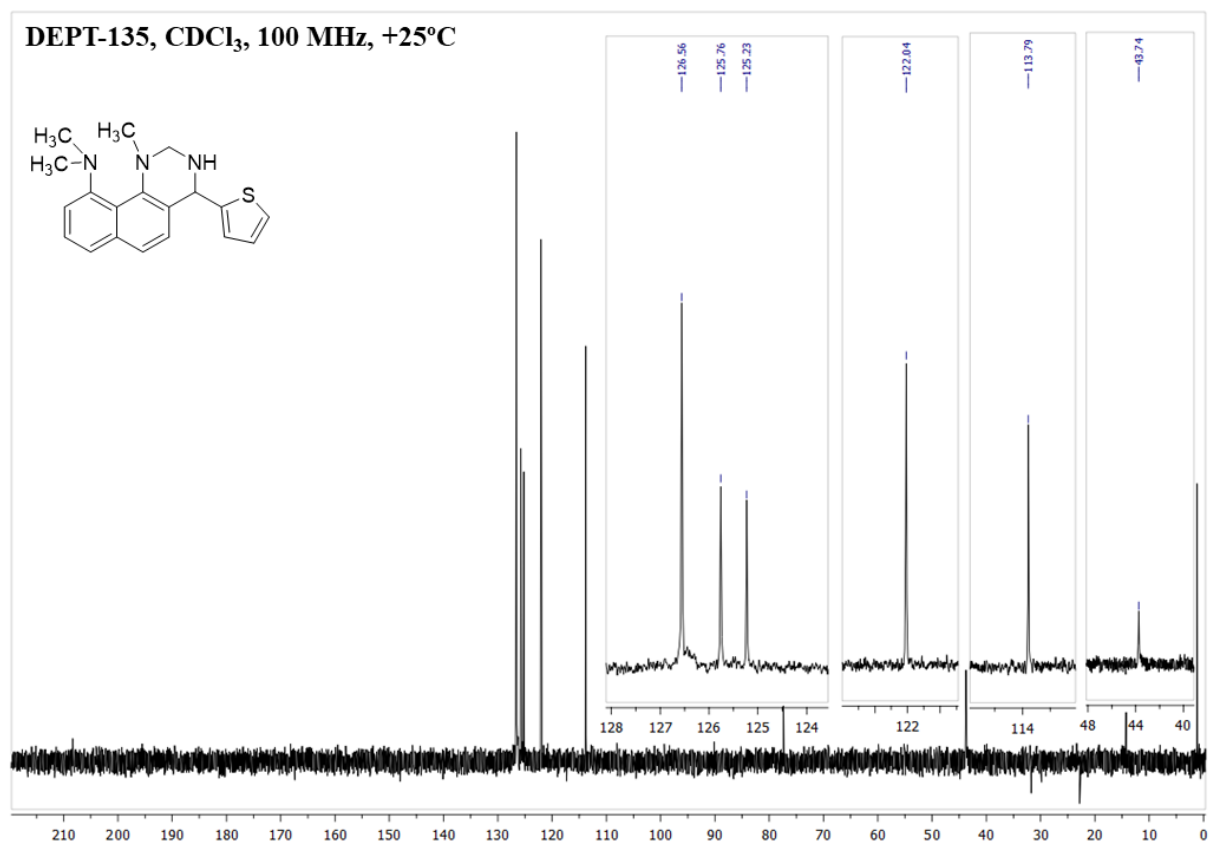

Figure S74.  $^{13}\text{C}$  DEPT NMR spectrum of **8g**.



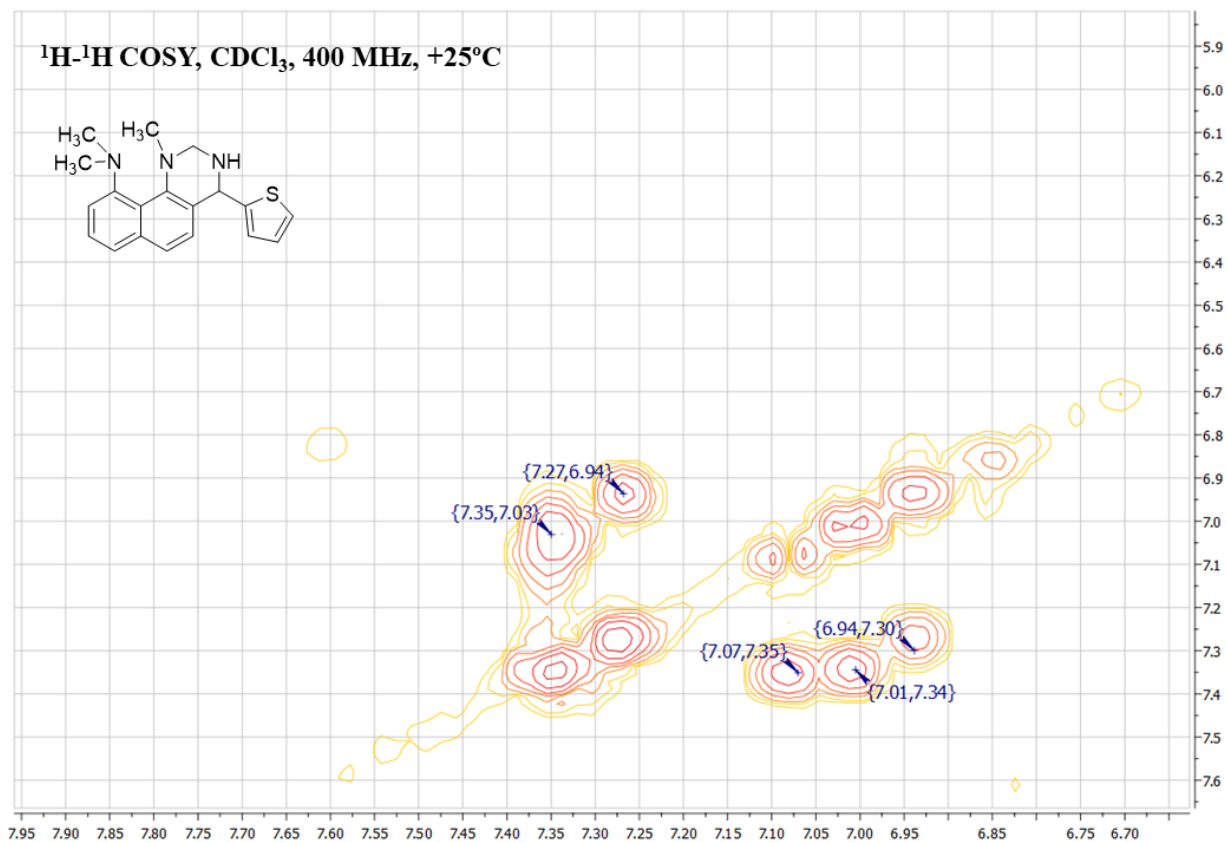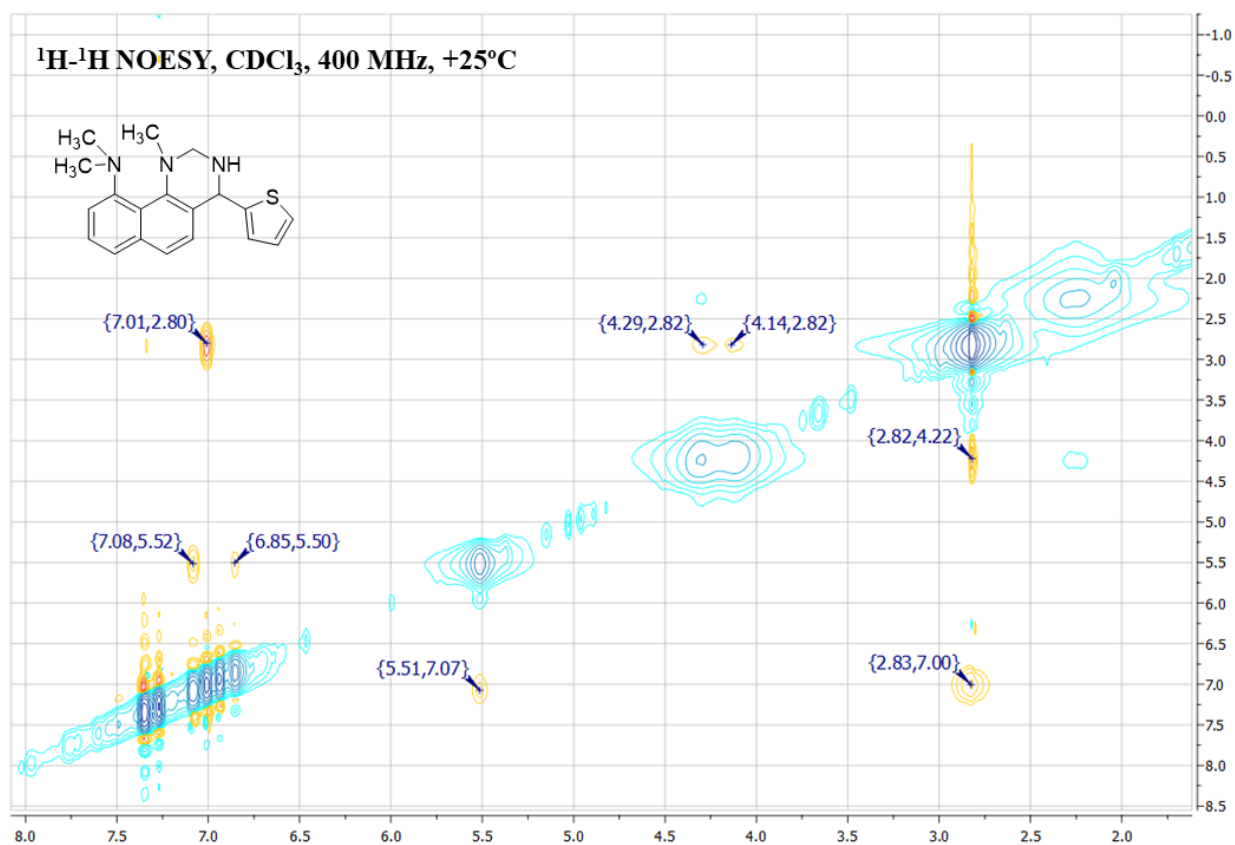

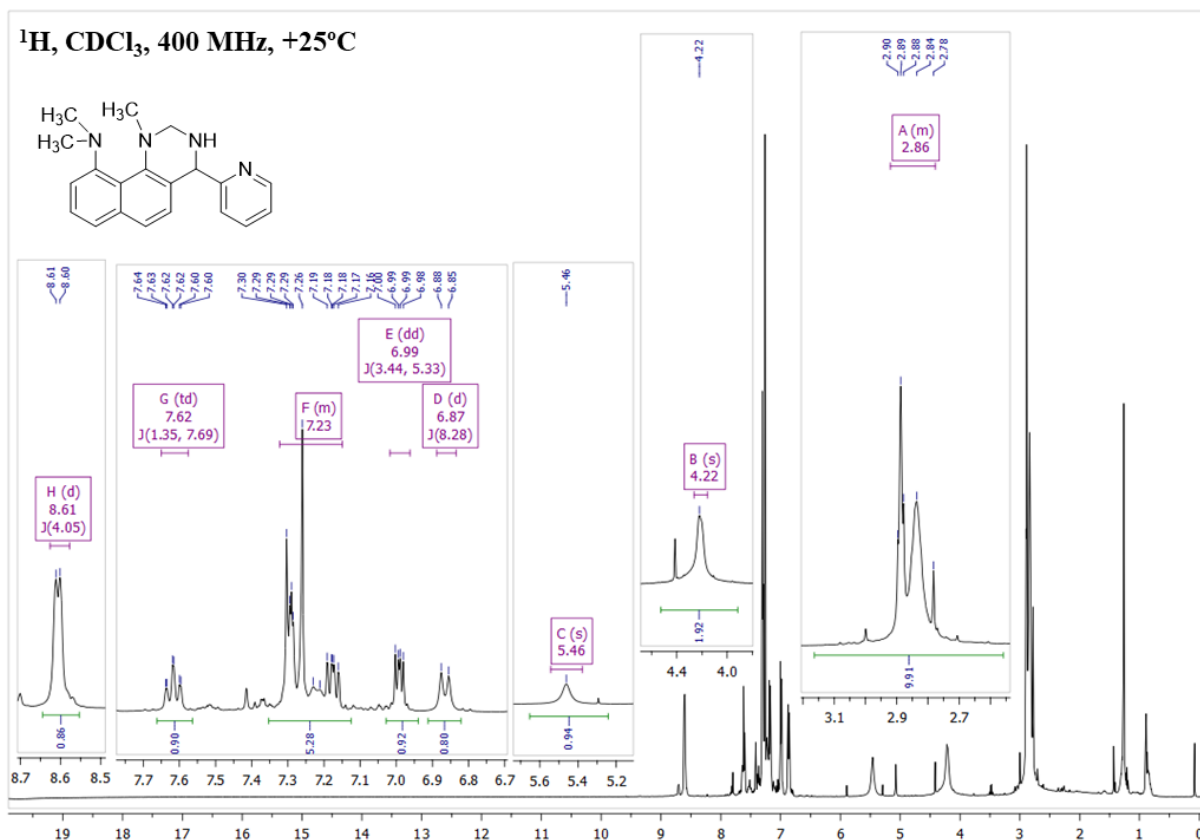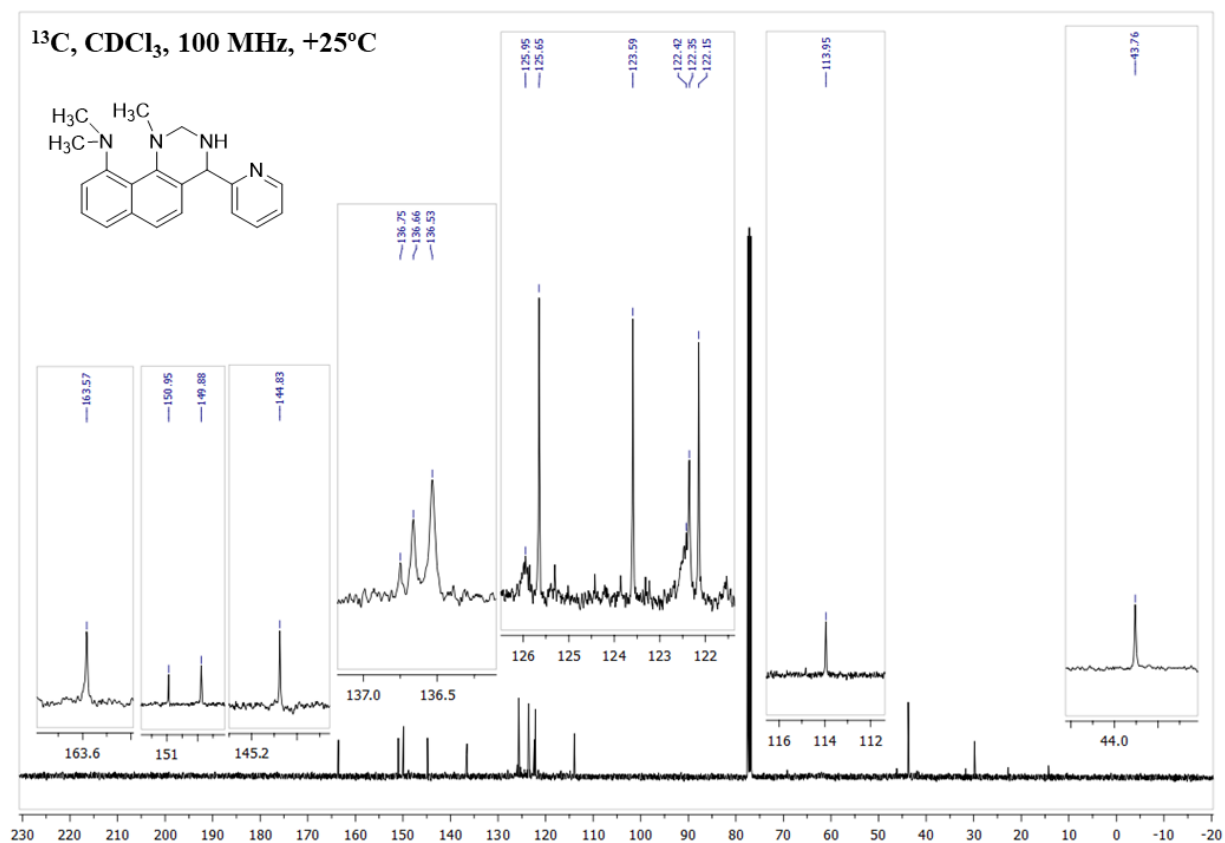

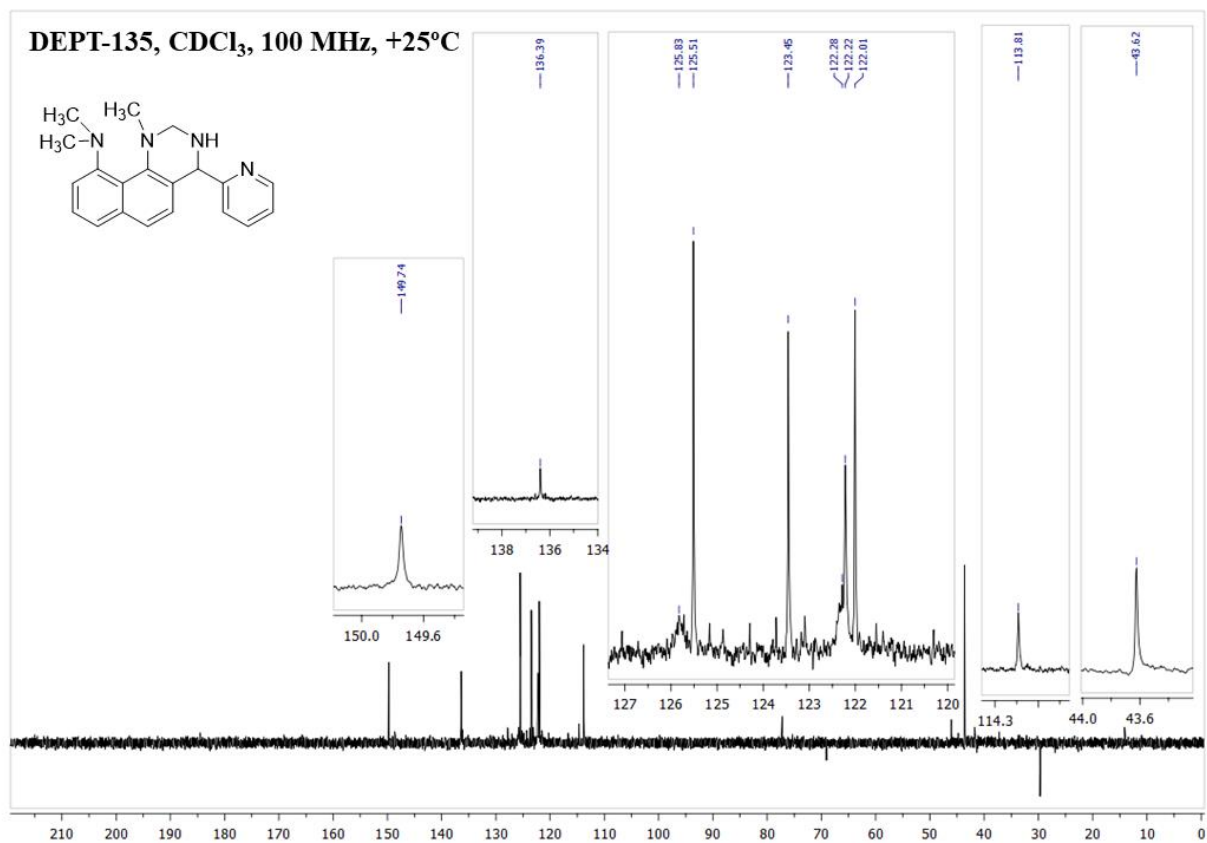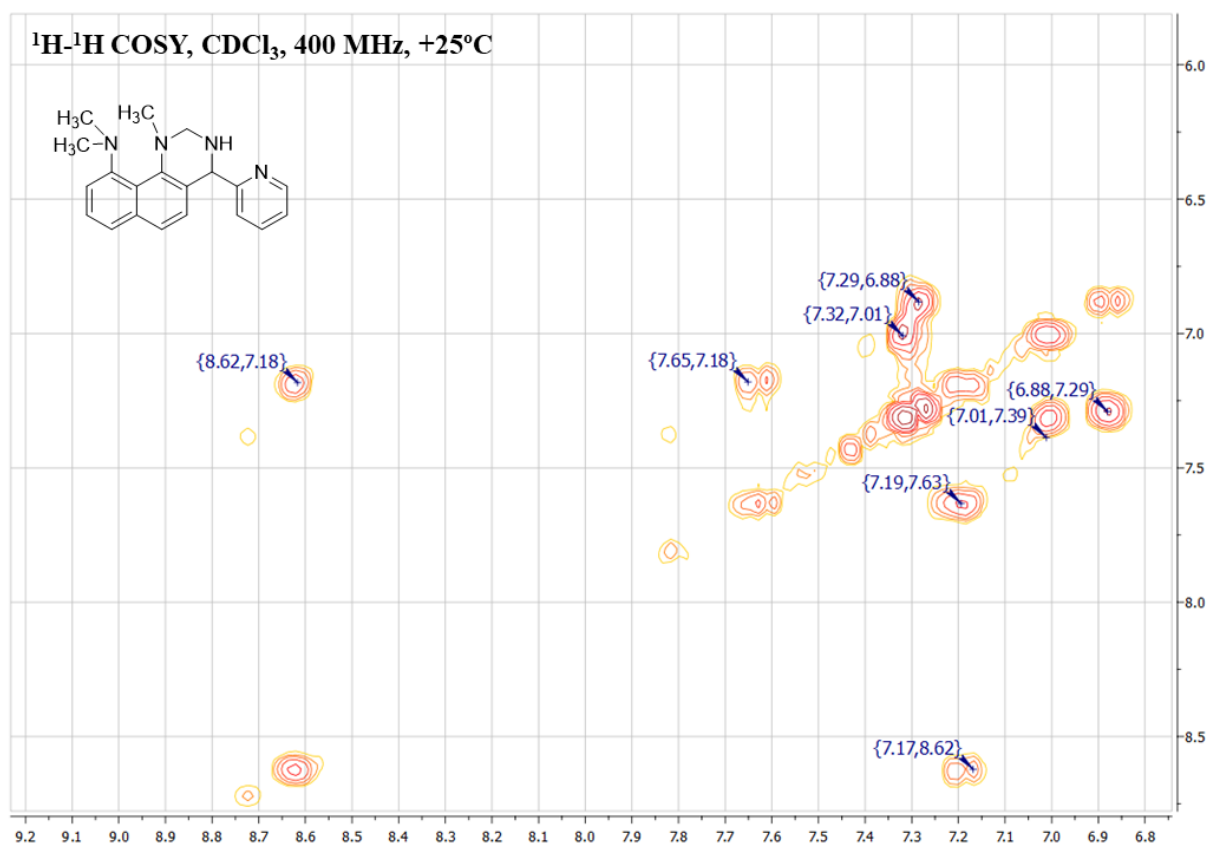

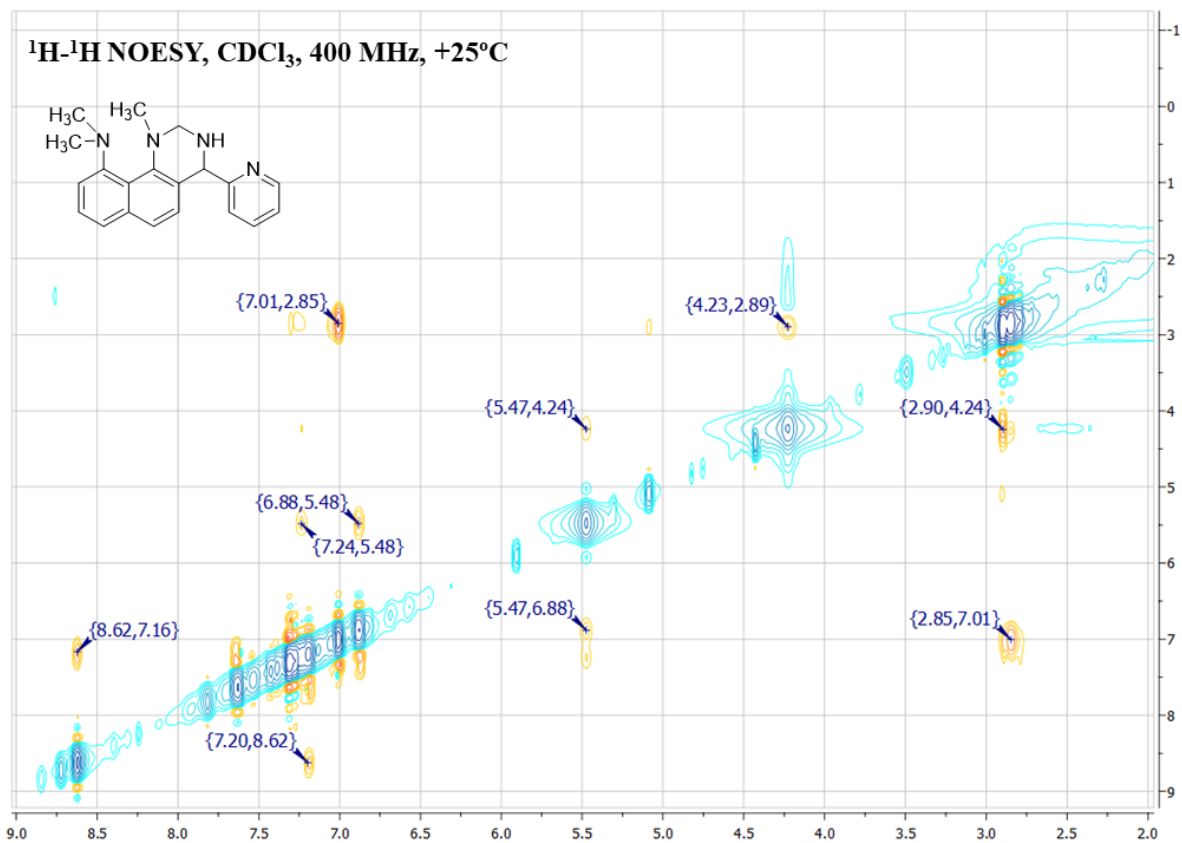

**Figure S81.**  $^1\text{H}$ - $^1\text{H}$  NOESY NMR spectrum of **8h**.

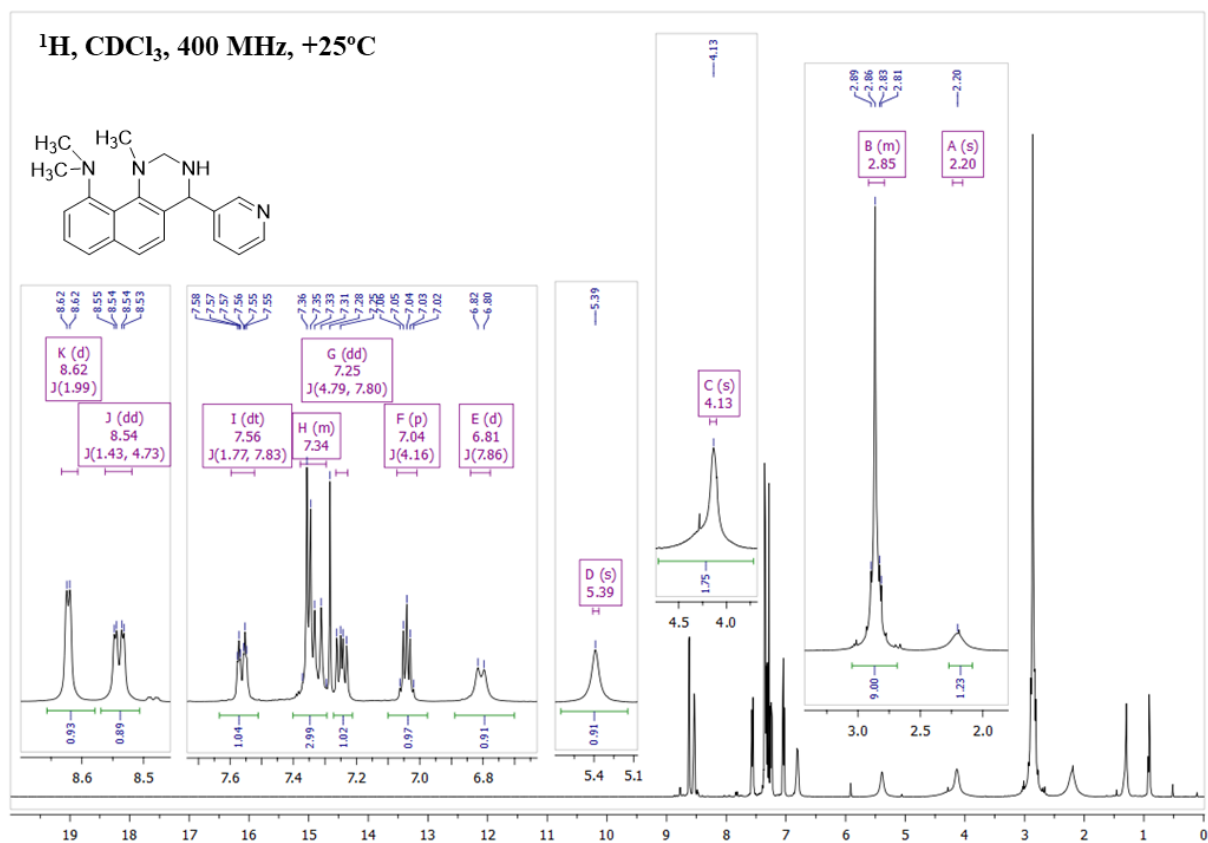

**Figure S82.**  $^1\text{H}$  NMR spectrum of **8i**.

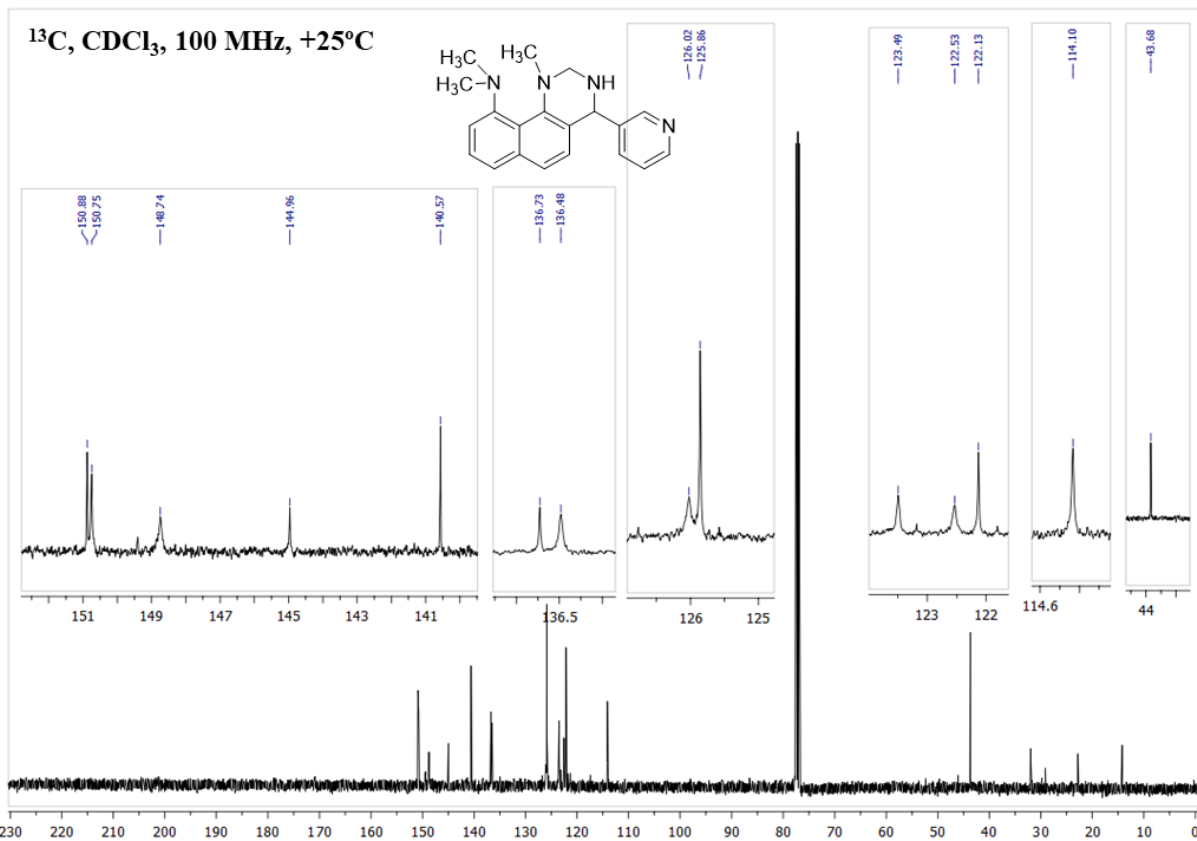

Figure S83.  $^{13}\text{C}$  NMR spectrum of **8i**.

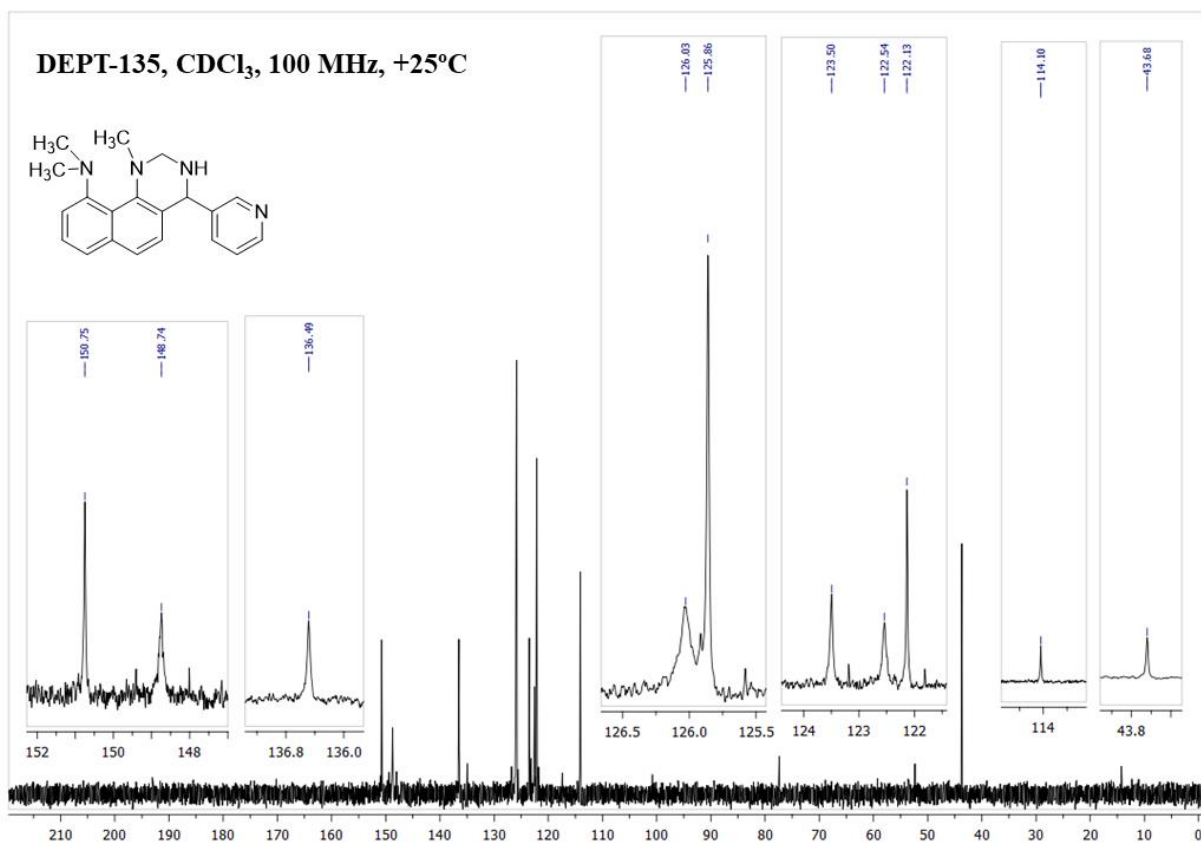

Figure S84.  $^{13}\text{C}$  DEPT NMR spectrum of **8i**.

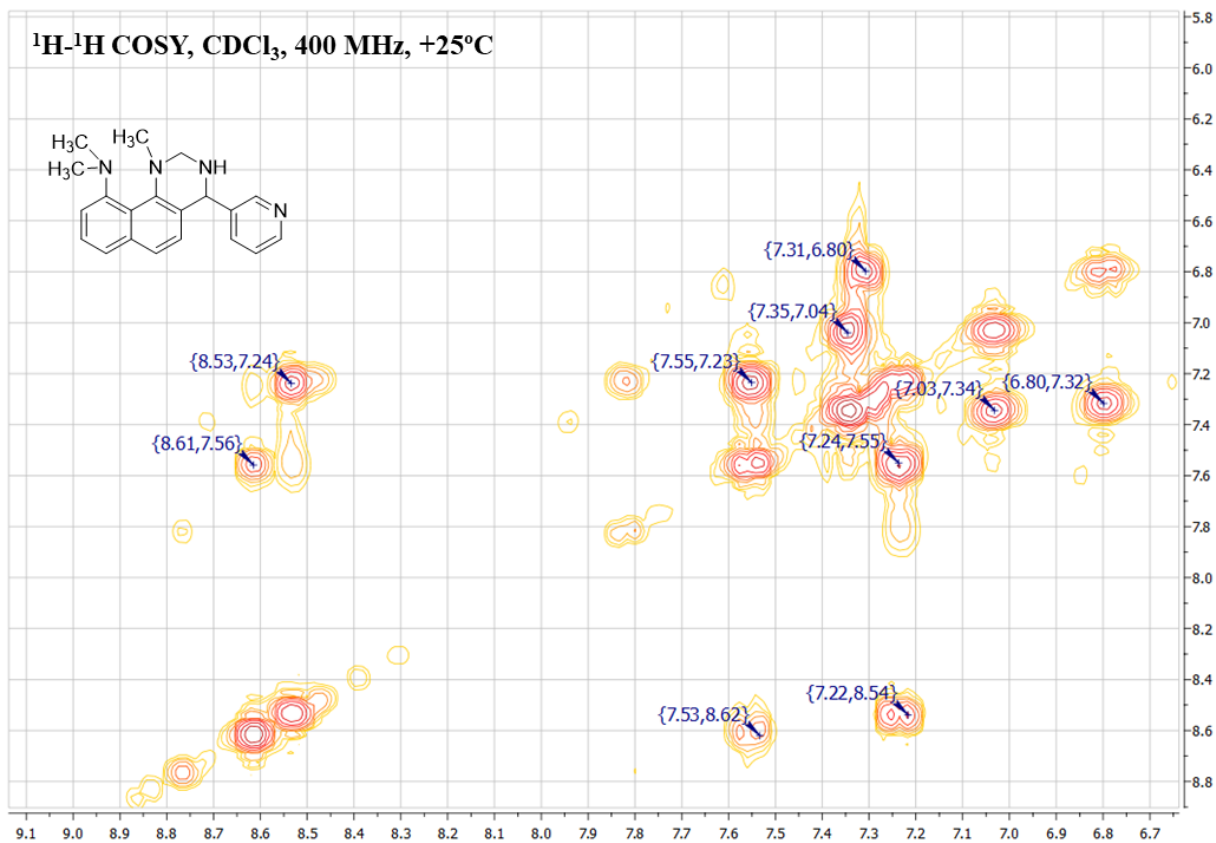

**Figure S85.**  $^1\text{H}$ - $^1\text{H}$  COSY NMR spectrum of **8i**.

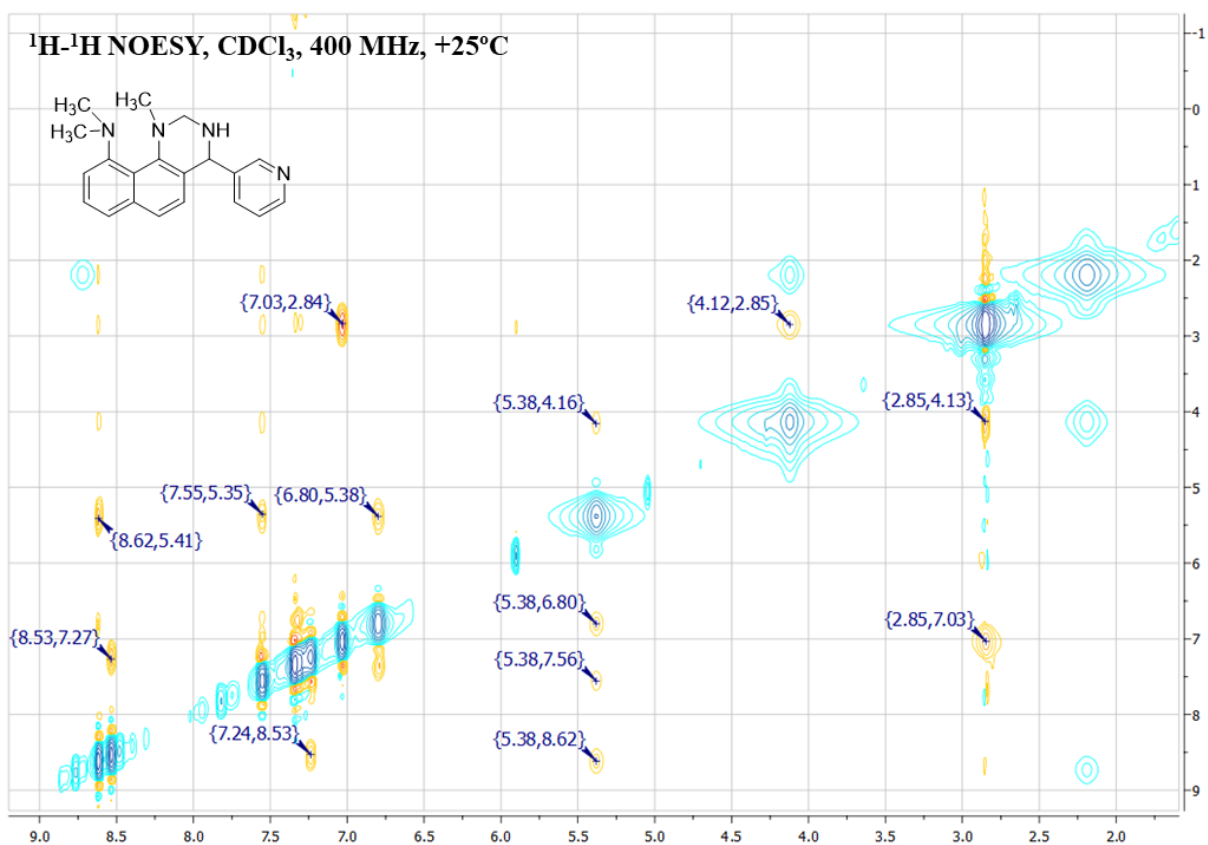

**Figure S86.**  $^1\text{H}$ - $^1\text{H}$  NOESY NMR spectrum of **8i**.

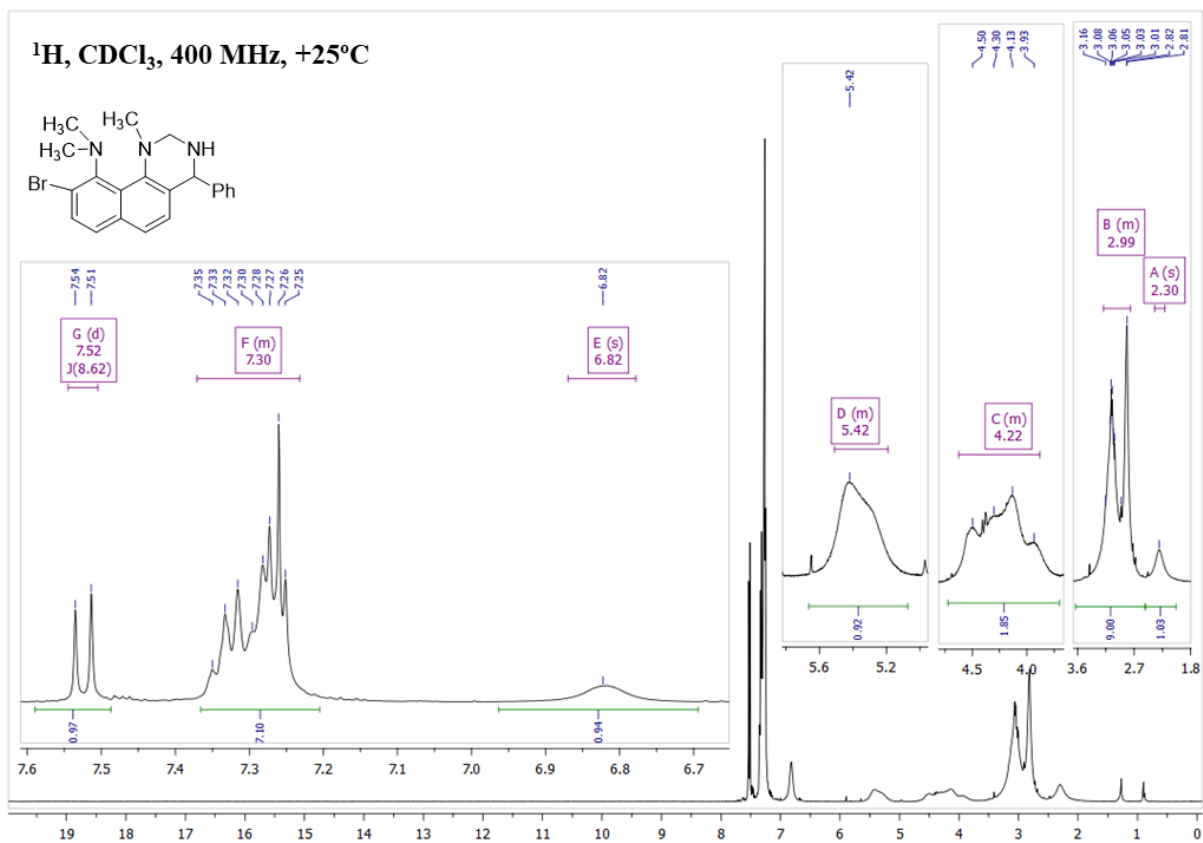

Figure S87. <sup>1</sup>H NMR spectrum of **8j**.

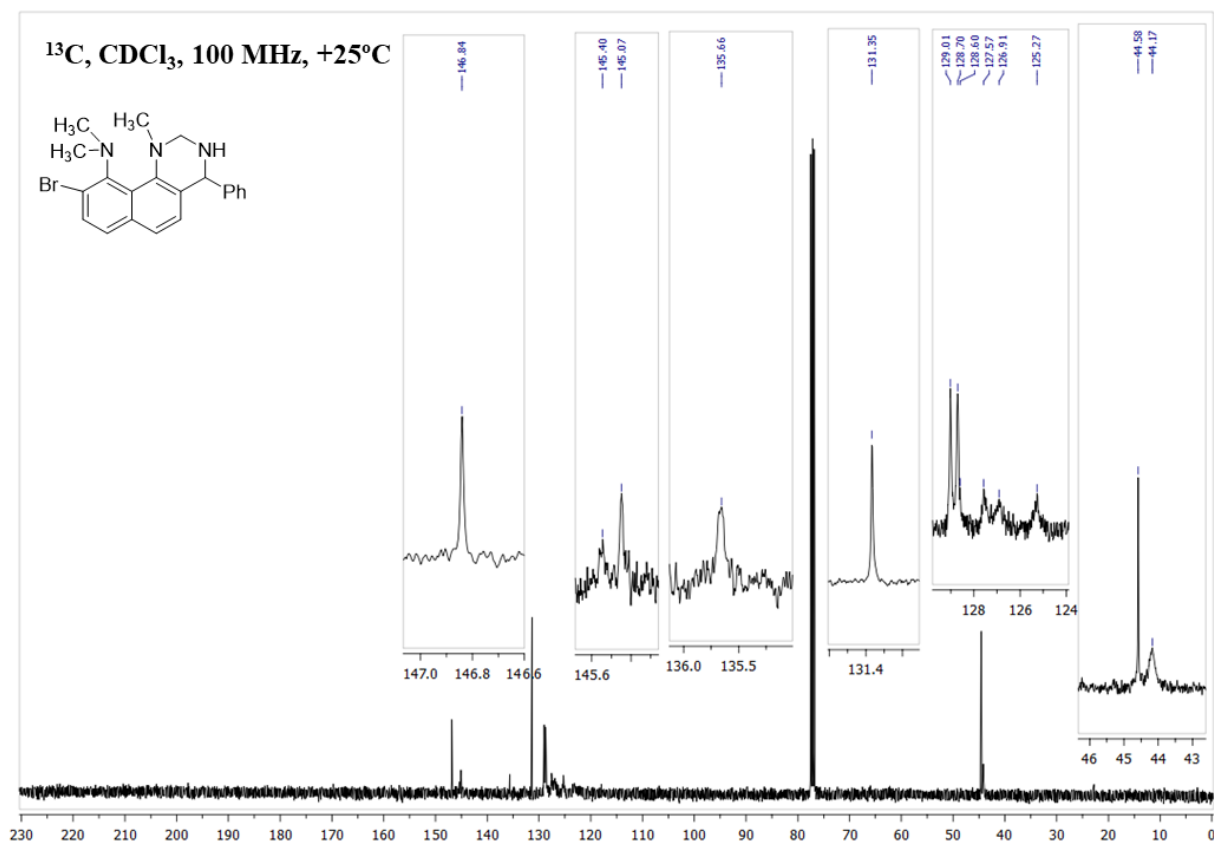

Figure S88. <sup>13</sup>C NMR spectrum of **8j**.

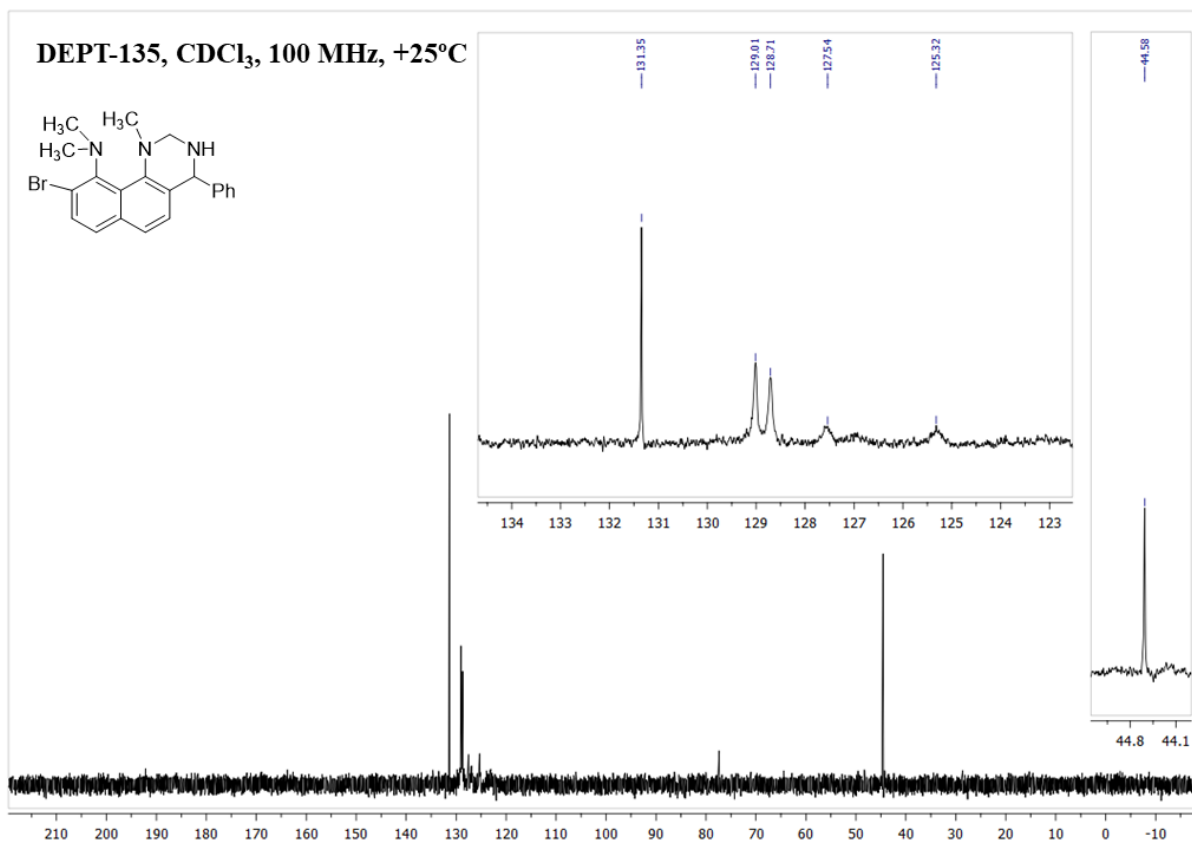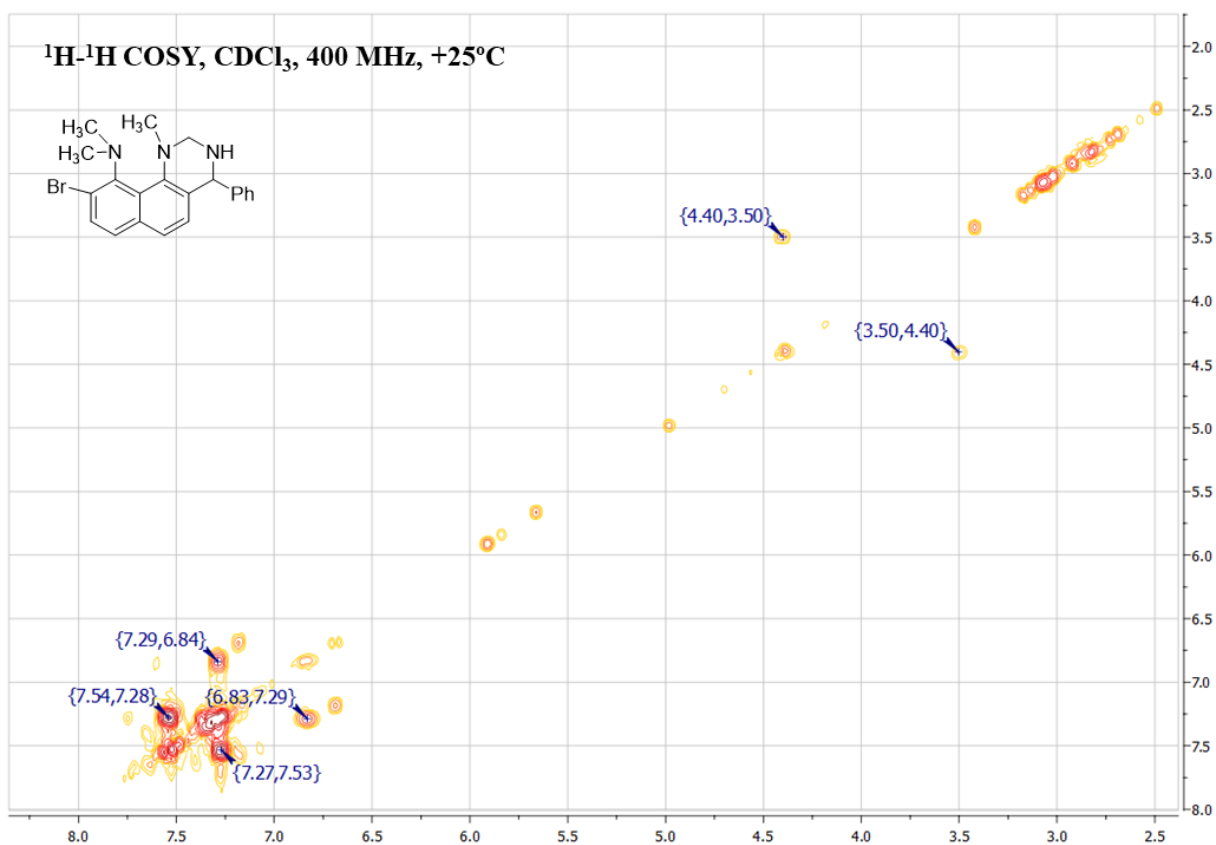



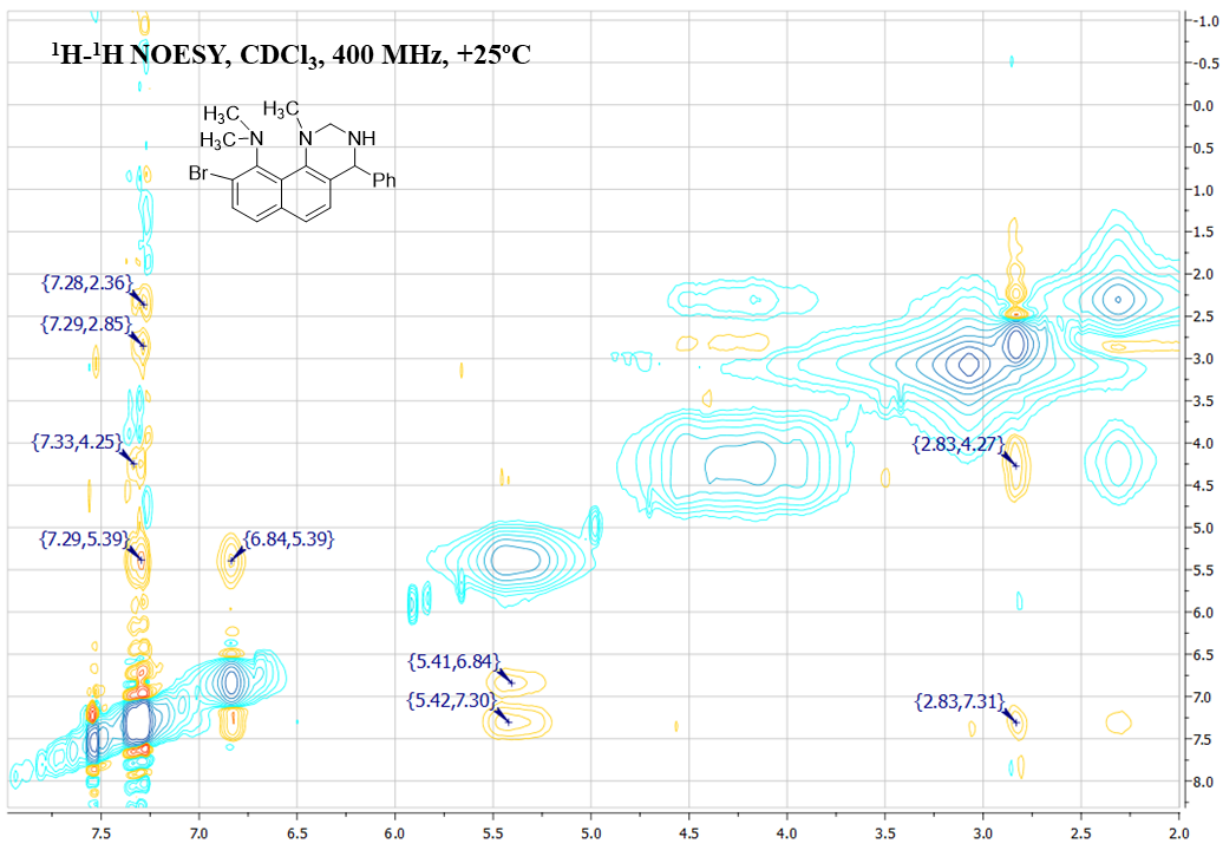

**Figure S91.**  $^1\text{H}$ - $^1\text{H}$  NOESY NMR spectrum of **8j**.

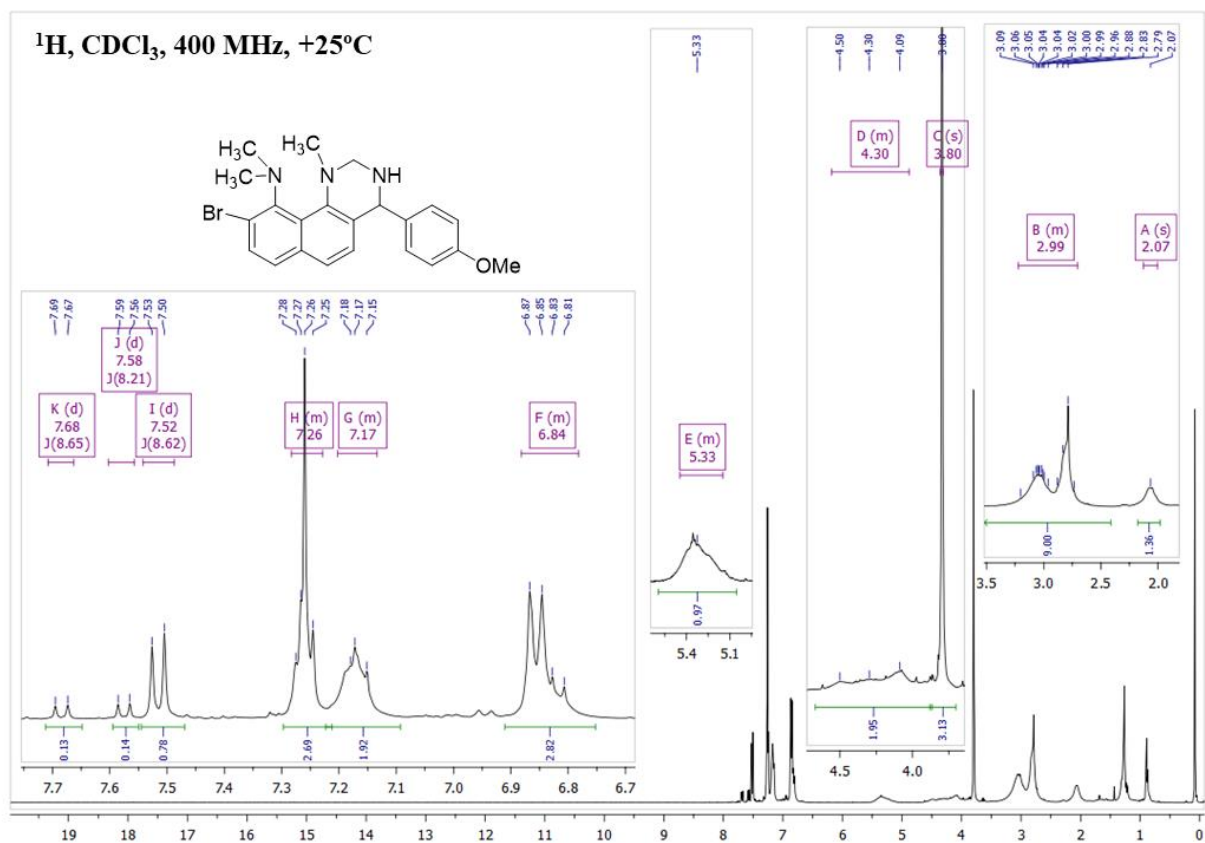

**Figure S92.**  $^1\text{H}$  NMR spectrum of **8k**.

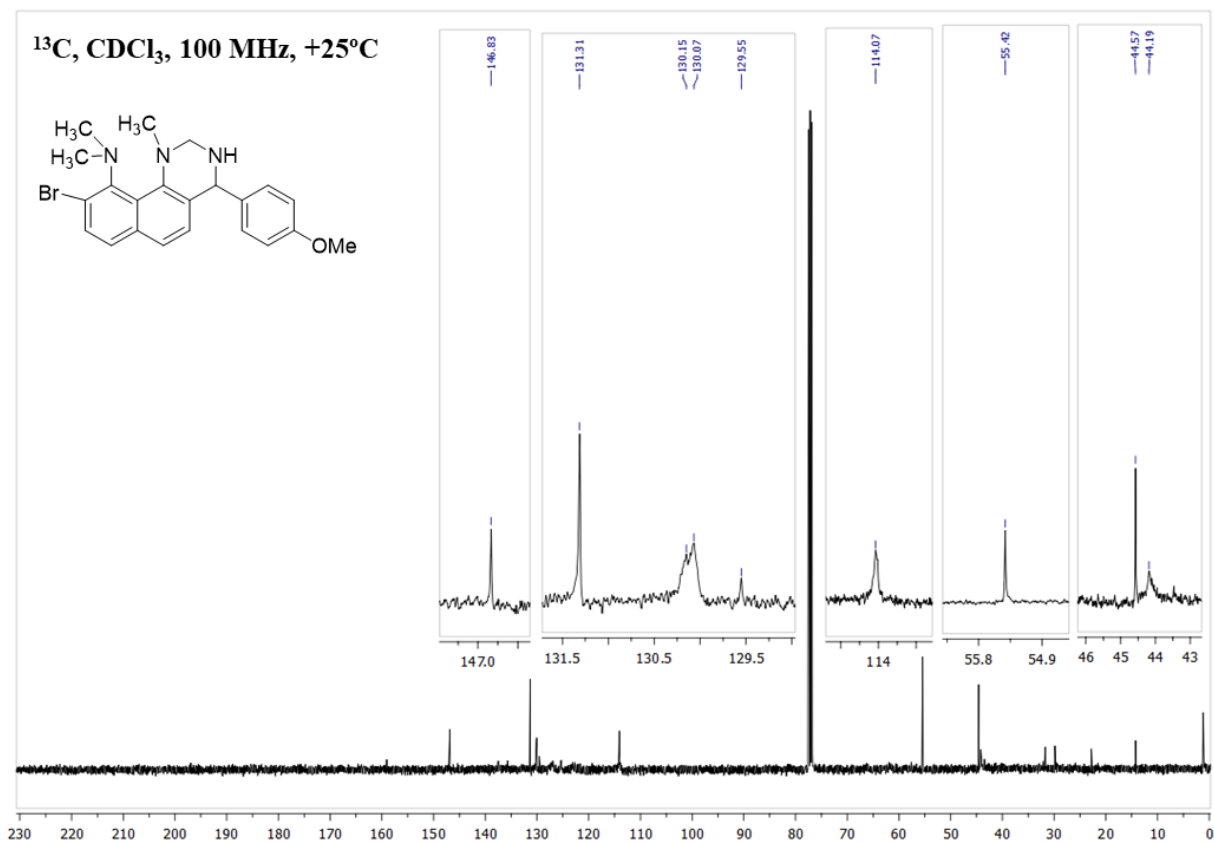

**Figure S93.**  $^{13}\text{C}$  NMR spectrum of **8k**.

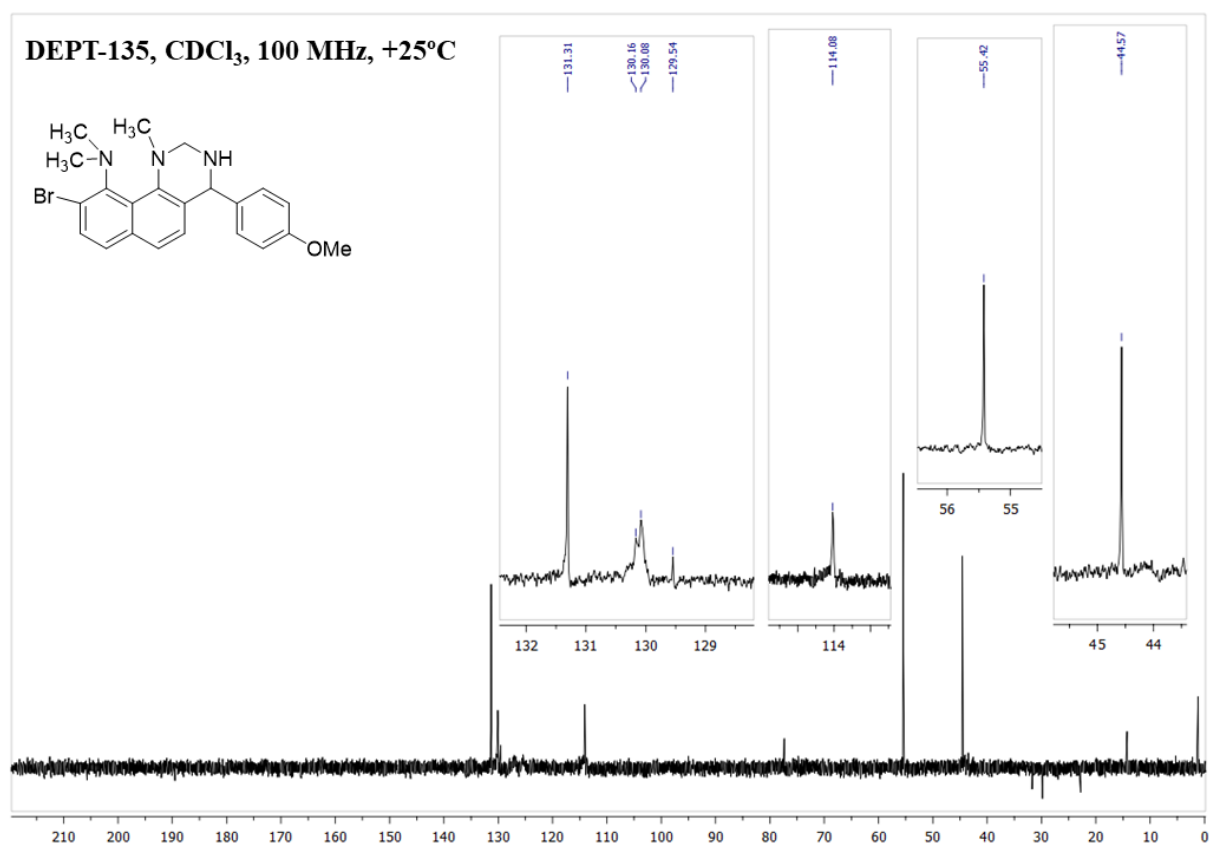

**Figure S94.**  $^{13}\text{C}$  DEPT NMR spectrum of **8k**.

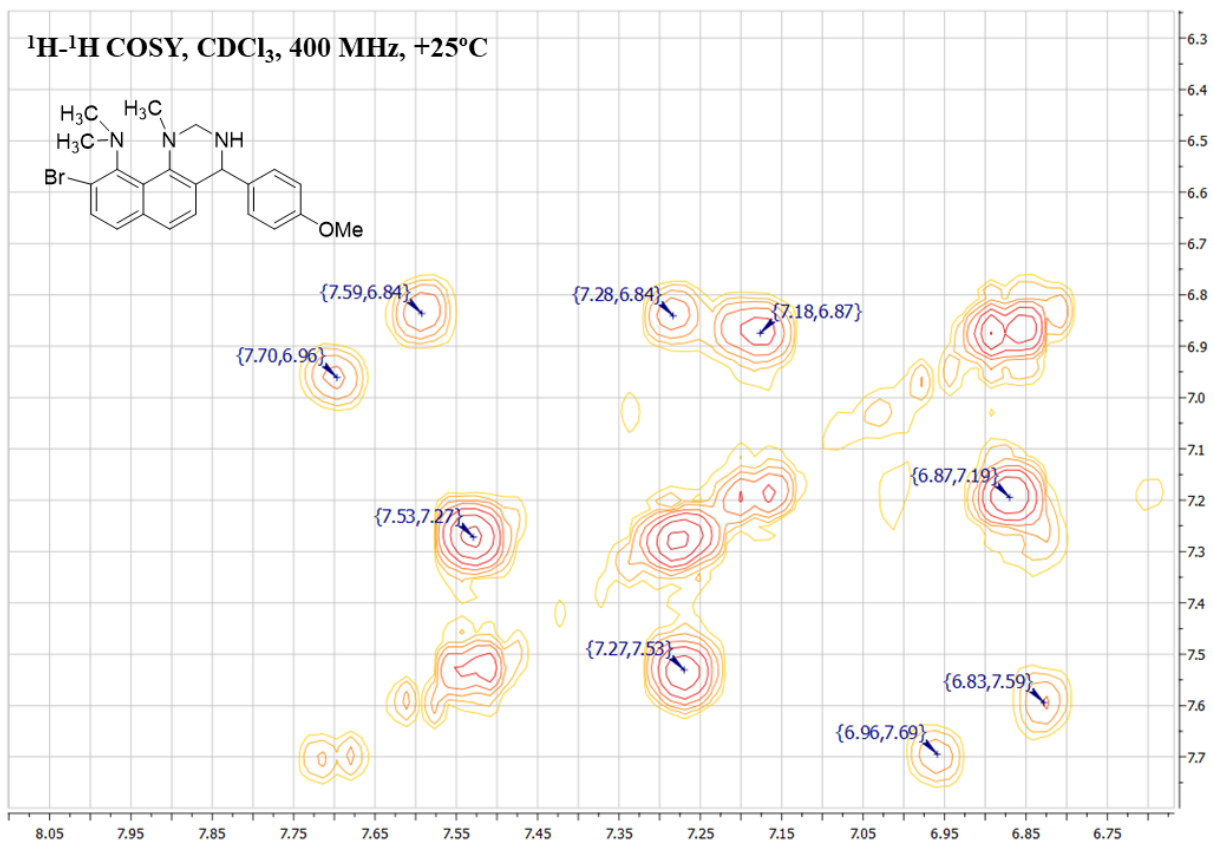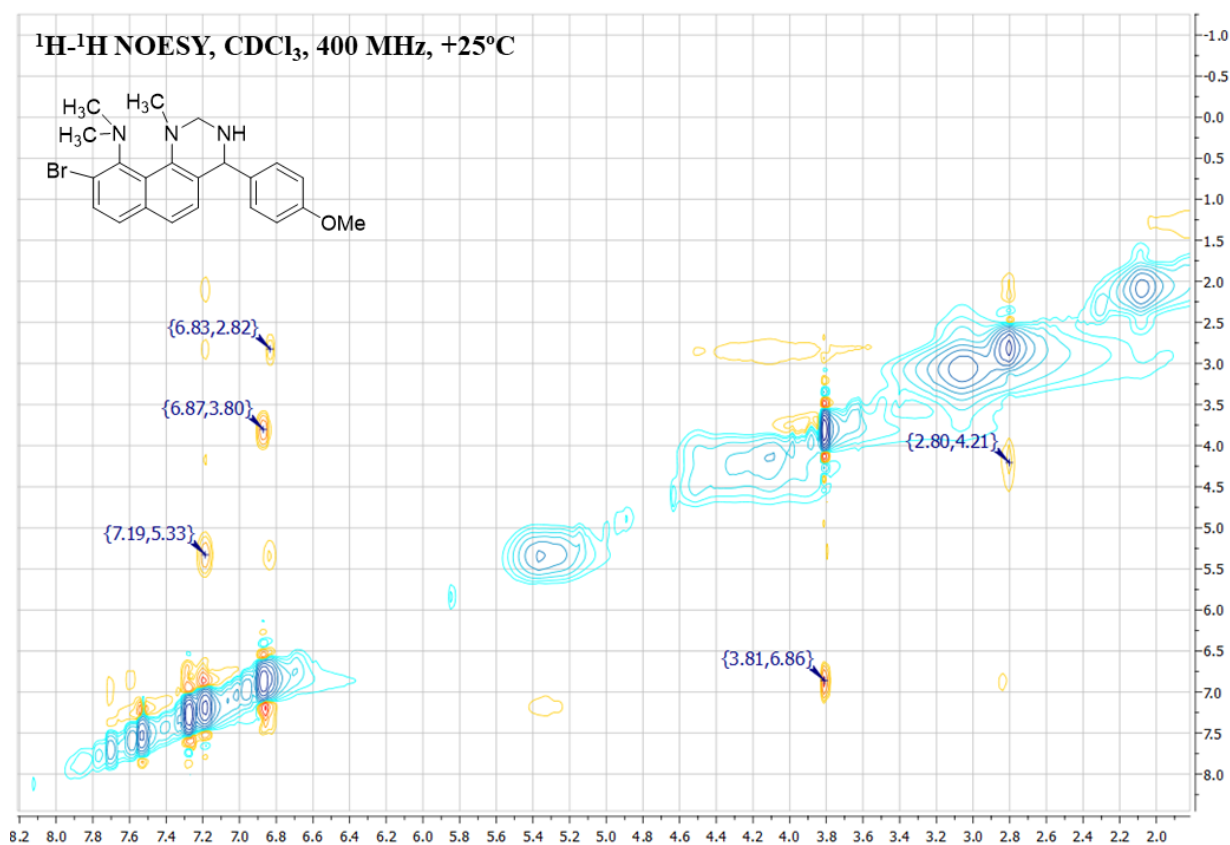

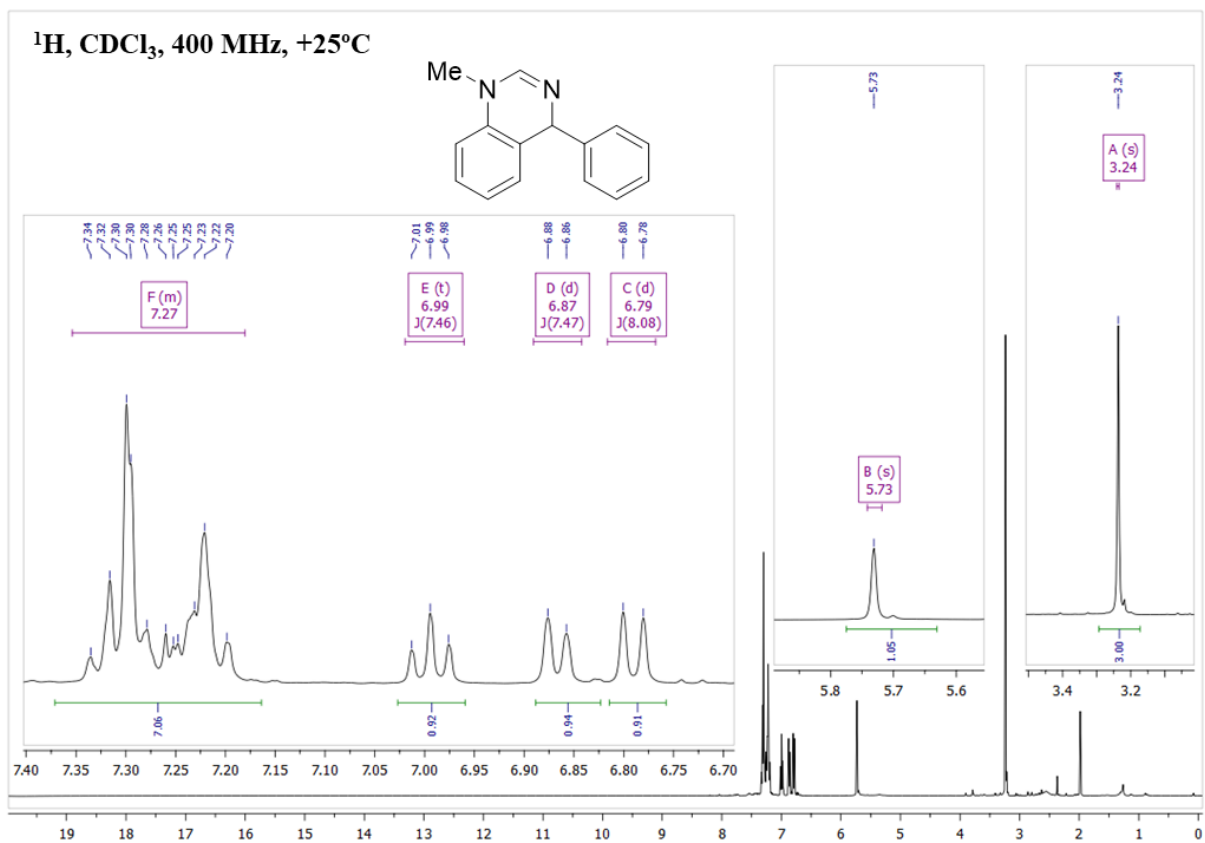

Figure S97. <sup>1</sup>H NMR spectrum of 15.

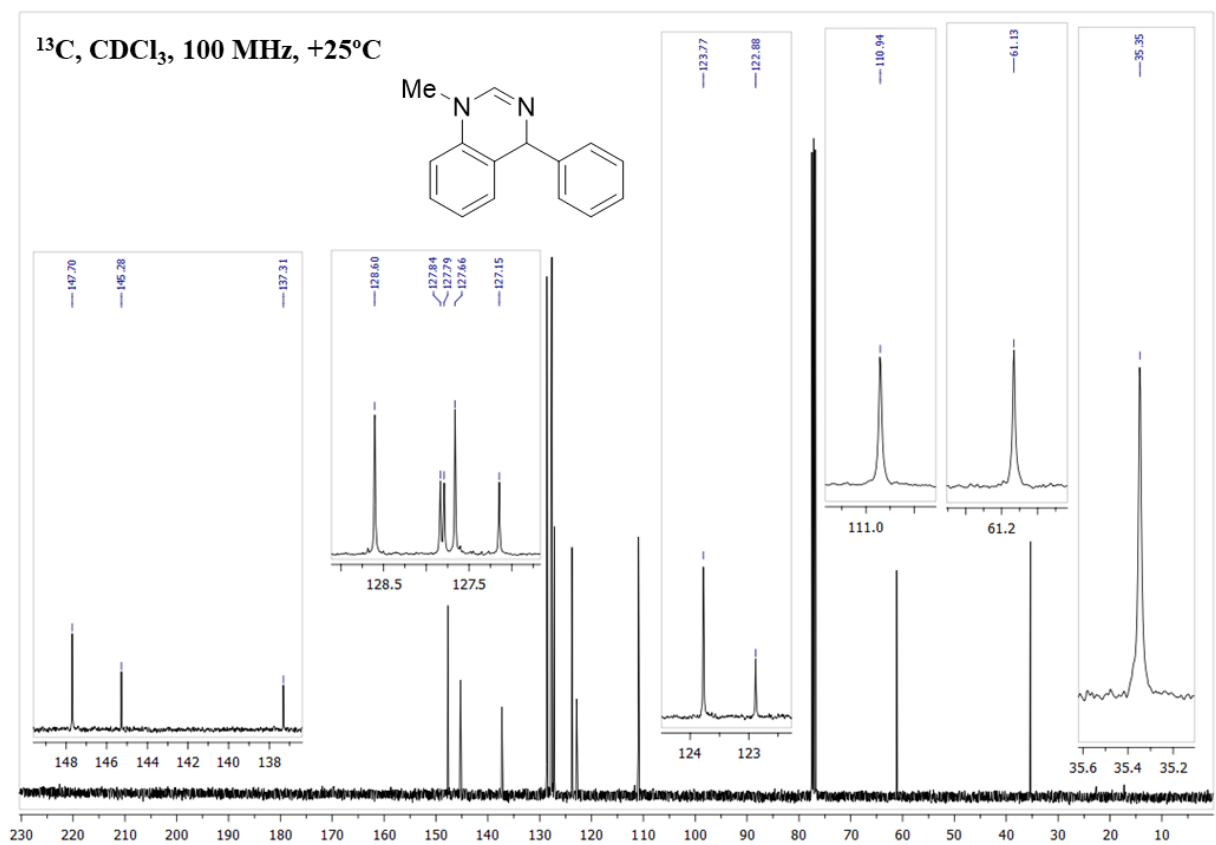

Figure S98. <sup>13</sup>C NMR spectrum of 12.

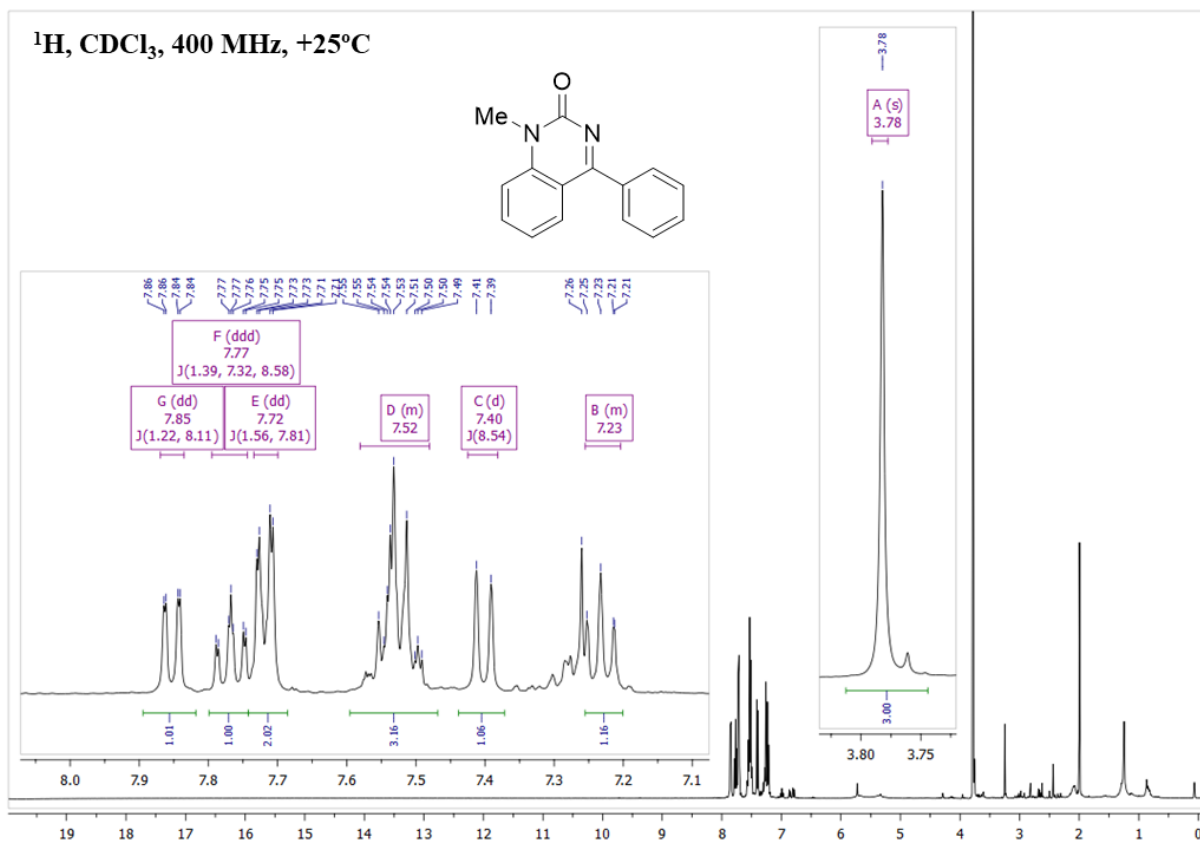

**Figure S99.** <sup>1</sup>H NMR spectrum of **13**.

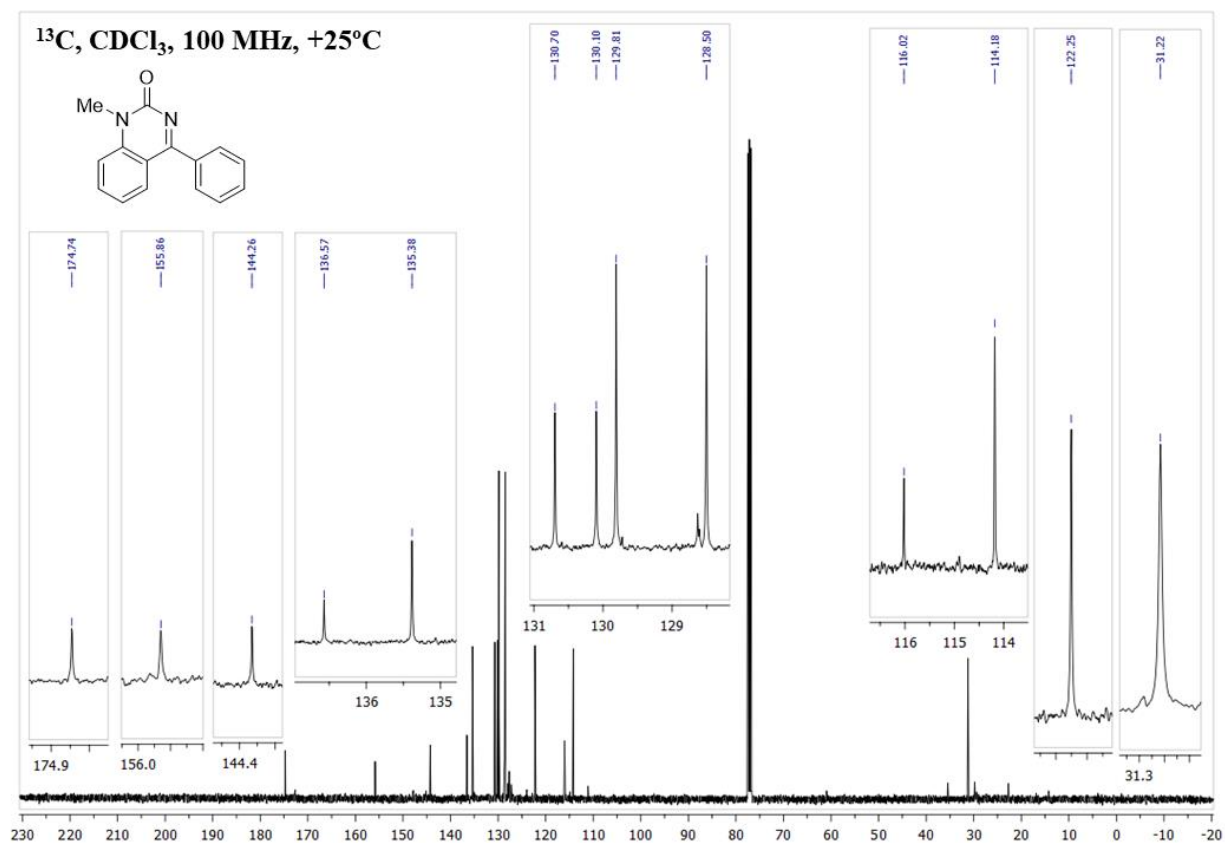

**Figure S100.** <sup>13</sup>C NMR spectrum of **13**.

## X-Ray data

Appropriate for X-ray analysis crystals were grown by slow evaporation of solutions of **8c**, **8e** in n-hexane. For single crystal X-ray diffraction experiment crystals were fixed on a micro mount and placed on a Rigaku XtaLAB Synergy single crystal diffractometer using CuK $\alpha$  monochromated radiation ( $\lambda = 1.5418 \text{ \AA}$ ). Crystals were kept at 100 K throughout the experiment. The unit cell parameters were refined by least square techniques. The structures have been solved by ShelXT<sup>[9]</sup> program, using Intrinsic Phasing and refined with the ShelXL package<sup>[10]</sup> incorporated in the OLEX2 program package<sup>[11]</sup>. Empirical absorption correction was applied in CrysAlisPro (Agilent Technologies, 2014) program complex using spherical harmonics, implemented in SCALE3 ABSPACK scaling algorithm. The hydrogen atoms were introduced to the geometrically calculated positions and refined by attaching themselves to the corresponding parent atoms.

Supplementary crystallographic data for this paper have been deposited at Cambridge Crystallographic Data Centre (CCDC 2130455, 2130475) and can be obtained free of charge via [www.ccdc.cam.ac.uk/structures/](http://www.ccdc.cam.ac.uk/structures/).

**Table S1.** Crystal data and structure refinement for compounds **8c**, **8e**.

| Parameter                                   | <b>8e</b>                                                         | <b>8c</b>                                                         |
|---------------------------------------------|-------------------------------------------------------------------|-------------------------------------------------------------------|
| Empirical formula                           | C <sub>19</sub> H <sub>27</sub> N <sub>3</sub>                    | C <sub>25</sub> H <sub>25</sub> N <sub>3</sub>                    |
| Formula weight                              | 297.43                                                            | 367.48                                                            |
| Temperature/K                               | 100(2)                                                            | 100(2)                                                            |
| Crystal system                              | orthorhombic                                                      | triclinic                                                         |
| Space group                                 | P2 <sub>1</sub> 2 <sub>1</sub> 2 <sub>1</sub>                     | P-1                                                               |
| a/Å                                         | 9.6026(2)                                                         | 8.9740(3)                                                         |
| b/Å                                         | 12.0411(3)                                                        | 10.1567(3)                                                        |
| c/Å                                         | 14.2206(4)                                                        | 11.2275(3)                                                        |
| $\alpha$ /°                                 | 90                                                                | 72.713(2)                                                         |
| $\beta$ /°                                  | 90                                                                | 89.359(2)                                                         |
| $\gamma$ /°                                 | 90                                                                | 80.928(2)                                                         |
| Volume/Å <sup>3</sup>                       | 1644.27(7)                                                        | 964.20(5)                                                         |
| Z                                           | 4                                                                 | 2                                                                 |
| $\rho_{\text{calc}}/\text{cm}^3$            | 1.202                                                             | 1.266                                                             |
| $\mu/\text{mm}^{-1}$                        | 0.546                                                             | 0.577                                                             |
| F(000)                                      | 648.0                                                             | 392.0                                                             |
| Crystal size/mm <sup>3</sup>                | 0.20×0.16×0.10                                                    | 0.12×0.12×0.08                                                    |
| Radiation                                   | CuK $\alpha$<br>( $\lambda=1.54184$ )                             | CuK $\alpha$<br>( $\lambda=1.54184$ )                             |
| 2 $\theta$ range for data collection/°      | 11.118 to 139.92                                                  | 8.254 to 139.992                                                  |
| Index ranges                                | -11 ≤ h ≤ 10,<br>-14 ≤ k ≤ 14,<br>-17 ≤ l ≤ 15                    | -11 ≤ h ≤ 11,<br>-12 ≤ k ≤ 12,<br>-14 ≤ l ≤ 14                    |
| Reflections collected                       | 10544                                                             | 11725                                                             |
| Independent reflections                     | 3091<br>R <sub>int</sub> = 0.0331,<br>R <sub>sigma</sub> = 0.0354 | 3647<br>R <sub>int</sub> = 0.0314,<br>R <sub>sigma</sub> = 0.0345 |
| Data/restraints/parameters                  | 3091/0/209                                                        | 3647/0/259                                                        |
| Goodness-of-fit on F <sup>2</sup>           | 1.052                                                             | 1.057                                                             |
| Final R indexes [ $I \geq 2\sigma(I)$ ]     | R <sub>1</sub> = 0.0335, wR <sub>2</sub> = 0.0900                 | R <sub>1</sub> = 0.0423, wR <sub>2</sub> = 0.1157                 |
| Final R indexes [all data]                  | R <sub>1</sub> = 0.0366, wR <sub>2</sub> = 0.0918                 | R <sub>1</sub> = 0.0473, wR <sub>2</sub> = 0.1212                 |
| Largest diff. peak/hole / e Å <sup>-3</sup> | 0.17/-0.17                                                        | 0.58/-0.19                                                        |
| Flack parameter                             | 0.2(2)                                                            | 0                                                                 |
| CCDC                                        | 2130455                                                           | 2130475                                                           |

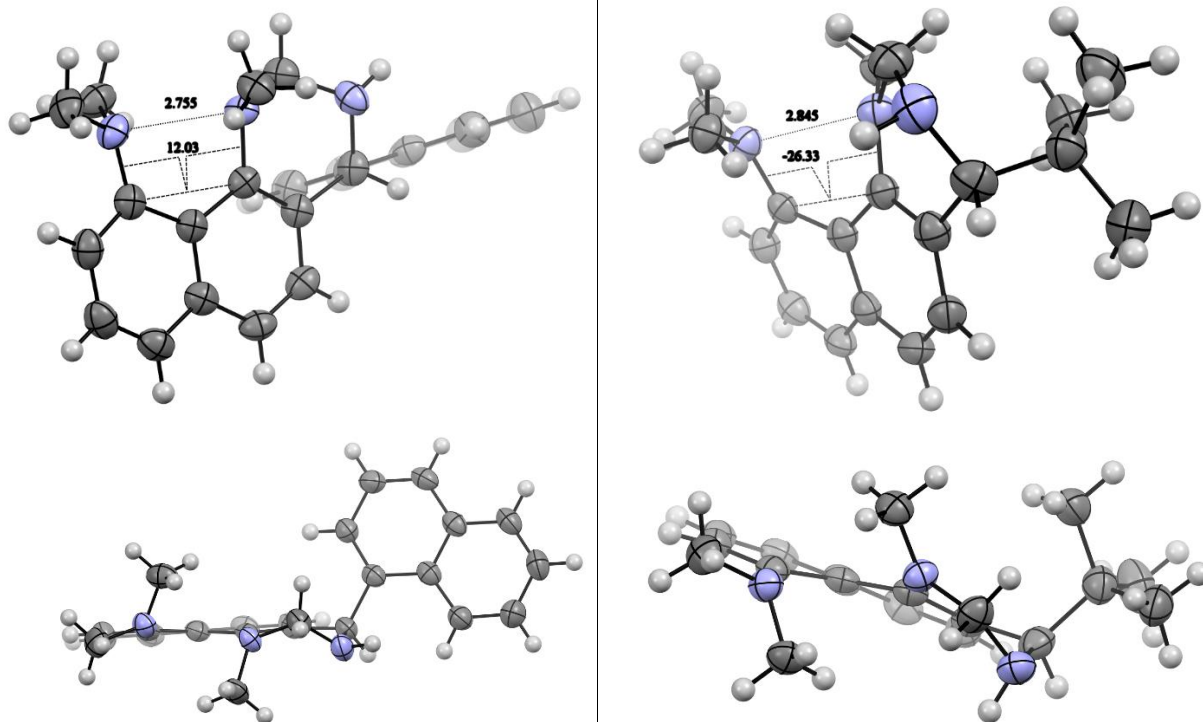

**Figure S101.** Molecular structure of 1,2,3,4-tetrahydrobenzo[*h*]quinazolines **8c** (left side) and **8e** (right side)

## Computational data

**General Remarks.** The geometry optimization of all model structures was carried out at the B3LYP/6-311++G\*\* (empirical dispersion=gd3bj) level of theory with the use of Gaussian-16 program package.<sup>[12]</sup> The geometry optimization was performed using analytical calculations of gradients according to the scheme of Berny<sup>[13]</sup>. The Hessian matrices were calculated analytically for all optimized model structures to prove the correct location of the extremum points on the potential energy surface - no imaginary frequencies for minima and one imaginary frequency for transition state. The standard grid size for Gaussian-16 was used (UltraFine grid). Solvation effects were taken into account by Tomasi polarizable continuum model (PCM).<sup>[14]</sup> The lack of the minima corresponding to intermediate in case of dication  $92\text{H}^+$  was confirmed by means of scan procedure - the distance  $r$  ( $\text{NCH}_2\text{-H}\dots\text{C}=\text{NH}$ ) is stepwise shortened (Fig. S102). In case of intermediates  $92\text{H}^+\text{Cl}^-$  and  $92\text{H}^+\text{MeSO}_3^-$  with counterion the IRC approach was utilized - the geometry with frozen  $r$  distance ( $r = 1.09\text{\AA}$ ) was optimized and applied as starting point in IRC procedure.

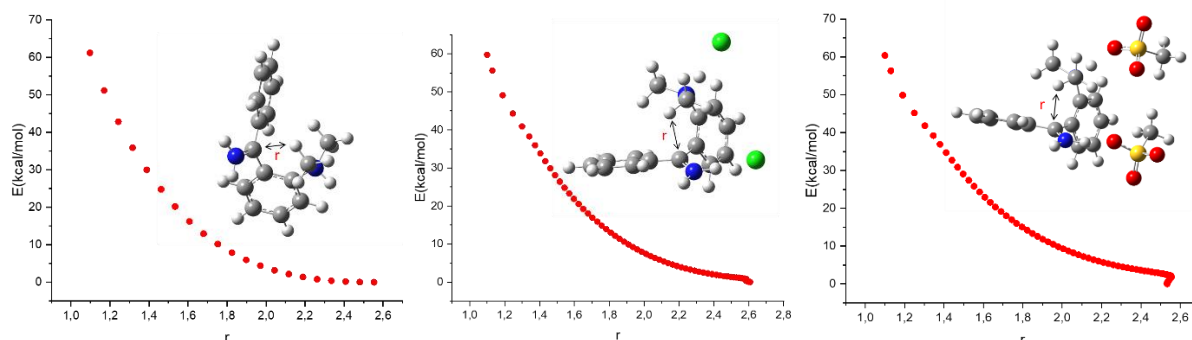

**Figure S102.** Calculated energy curves for the hydride transfer in dications  $92\text{H}^+$  (left),  $92\text{H}^+\text{Cl}^-$  (middle),  $92\text{H}^+\text{MeSO}_3^-$  (right).

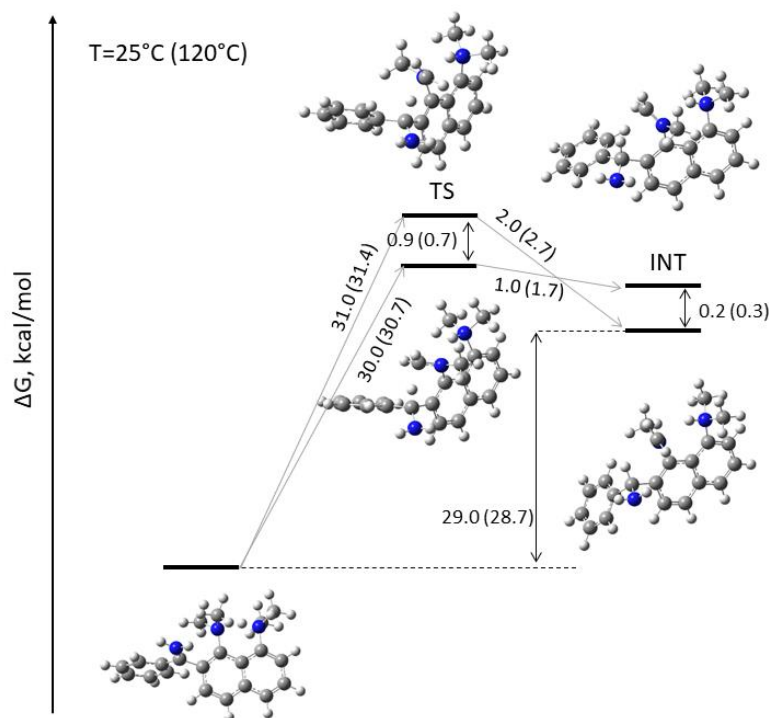

**Figure S103.** Reaction profile for the hydride transfer in **10a**



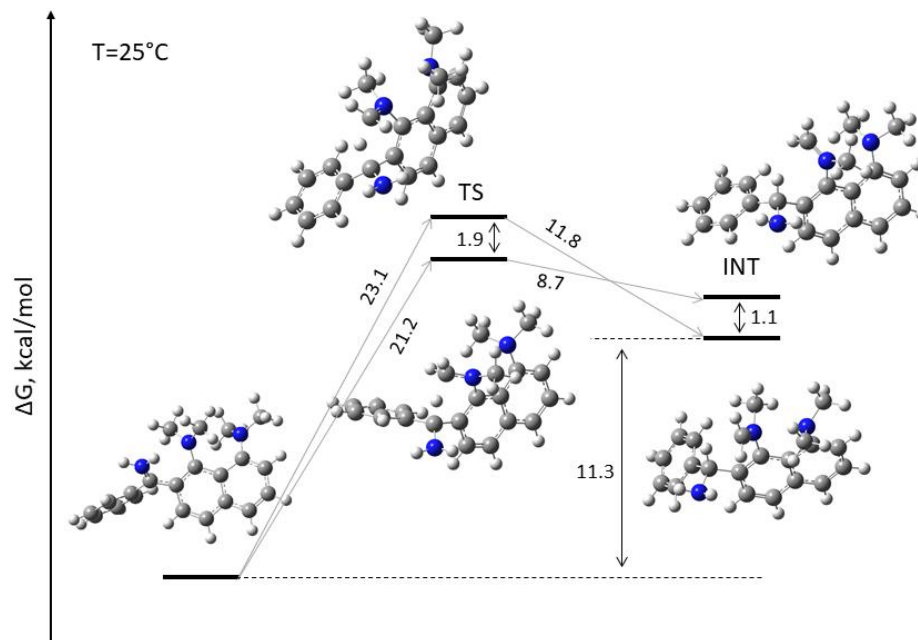

Figure S104. Reaction profile for the hydride transfer in **9a'''**

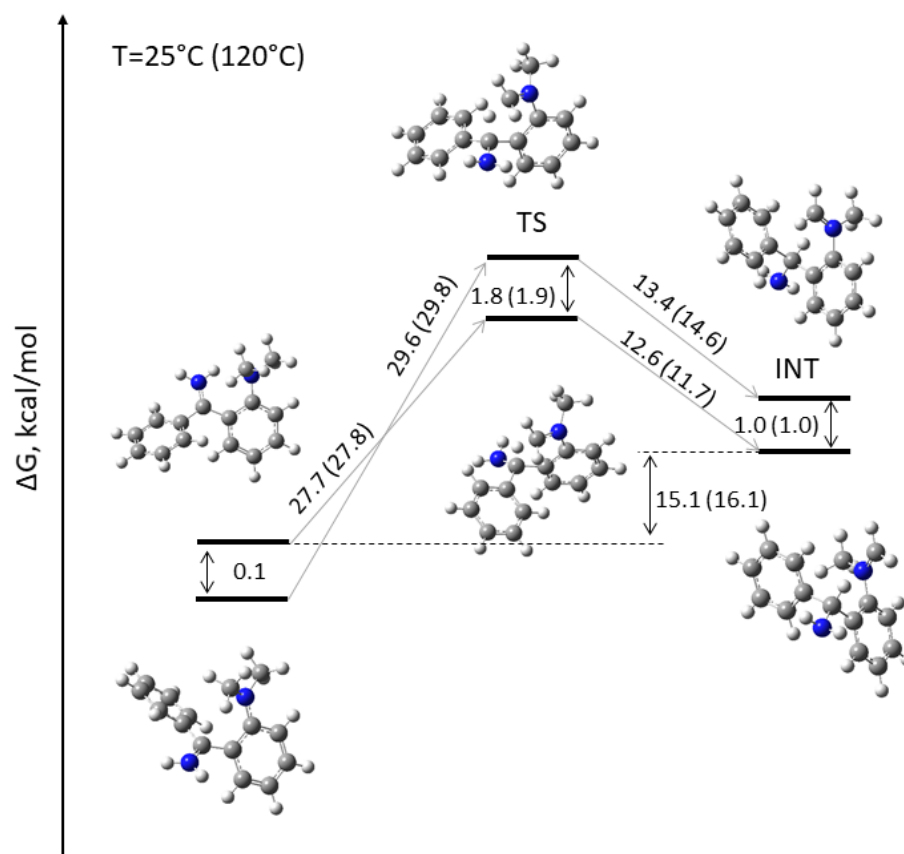

Figure S105. Reaction profile for the hydride transfer in **17**

## Cartesian coordinates and total energies

Imine monocation **9H<sup>+</sup>** (conformer-1)

E = -691.431305389

| Center<br>Number | Atomic<br>Number | Atomic<br>Type | Coordinates (Angstroms) |           |           |
|------------------|------------------|----------------|-------------------------|-----------|-----------|
|                  |                  |                | X                       | Y         | Z         |
| 1                | 6                | 0              | 3.548818                | 0.550330  | 1.195232  |
| 2                | 6                | 0              | 2.702987                | -0.538415 | 1.112658  |
| 3                | 1                | 0              | 3.983353                | 2.562595  | 0.521374  |
| 4                | 6                | 0              | 3.313565                | 1.715945  | 0.449522  |
| 5                | 6                | 0              | 1.569068                | -0.522360 | 0.266063  |
| 6                | 6                | 0              | 1.266628                | 0.707556  | -0.400592 |
| 7                | 6                | 0              | 2.183768                | 1.784292  | -0.335837 |
| 8                | 1                | 0              | 1.941085                | 2.711622  | -0.839437 |
| 9                | 7                | 0              | 0.820736                | -1.653073 | 0.082932  |
| 10               | 6                | 0              | 0.928268                | -2.763083 | 1.021997  |
| 11               | 1                | 0              | 0.988678                | -2.393230 | 2.044817  |
| 12               | 1                | 0              | 0.028337                | -3.372165 | 0.934570  |
| 13               | 1                | 0              | 1.797796                | -3.398865 | 0.814266  |
| 14               | 6                | 0              | 0.221108                | -2.015832 | -1.197647 |
| 15               | 1                | 0              | 0.622838                | -2.982596 | -1.516609 |
| 16               | 1                | 0              | -0.865955               | -2.096683 | -1.123664 |
| 17               | 1                | 0              | 0.468458                | -1.281750 | -1.961335 |
| 18               | 6                | 0              | -0.022116               | 0.969436  | -1.005981 |
| 19               | 7                | 0              | -0.089600               | 1.708750  | -2.092961 |
| 20               | 1                | 0              | -0.970266               | 2.077114  | -2.427039 |
| 21               | 6                | 0              | -1.280927               | 0.536000  | -0.391175 |
| 22               | 6                | 0              | -1.372133               | 0.427855  | 1.005112  |
| 23               | 6                | 0              | -2.406253               | 0.261396  | -1.183909 |
| 24               | 6                | 0              | -2.572190               | 0.058620  | 1.594906  |
| 25               | 1                | 0              | -0.509163               | 0.652238  | 1.617883  |
| 26               | 6                | 0              | -3.602955               | -0.116281 | -0.587198 |
| 27               | 1                | 0              | -2.335613               | 0.296816  | -2.264378 |
| 28               | 6                | 0              | -3.687649               | -0.216266 | 0.800908  |
| 29               | 1                | 0              | -2.641422               | -0.013163 | 2.673097  |
| 30               | 1                | 0              | -4.463505               | -0.342335 | -1.204123 |
| 31               | 1                | 0              | -4.621078               | -0.511223 | 1.264956  |
| 32               | 1                | 0              | 0.741602                | 1.955651  | -2.613330 |
| 33               | 1                | 0              | 2.948440                | -1.437575 | 1.658317  |
| 34               | 1                | 0              | 4.422123                | 0.488338  | 1.834082  |

Imine monocation **9H<sup>+</sup>** (Transition state-1)

E = -691.379855608

| Center<br>Number | Atomic<br>Number | Atomic<br>Type | Coordinates (Angstroms) |           |           |
|------------------|------------------|----------------|-------------------------|-----------|-----------|
|                  |                  |                | X                       | Y         | Z         |
| 1                | 6                | 0              | 3.036186                | -1.789439 | -0.880355 |
| 2                | 6                | 0              | 3.069379                | -0.427260 | -0.617358 |
| 3                | 1                | 0              | 1.891589                | -3.608121 | -0.724737 |
| 4                | 6                | 0              | 1.916666                | -2.544104 | -0.525636 |
| 5                | 6                | 0              | 1.988751                | 0.183910  | 0.020922  |
| 6                | 6                | 0              | 0.858832                | -0.569176 | 0.399181  |
| 7                | 6                | 0              | 0.834083                | -1.932391 | 0.093993  |

|    |   |   |           |           |           |
|----|---|---|-----------|-----------|-----------|
| 8  | 1 | 0 | -0.039299 | -2.512900 | 0.365283  |
| 9  | 7 | 0 | 1.944443  | 1.595759  | 0.189877  |
| 10 | 6 | 0 | 2.136368  | 2.433679  | -1.005495 |
| 11 | 1 | 0 | 1.373593  | 2.215181  | -1.756795 |
| 12 | 1 | 0 | 2.083228  | 3.479247  | -0.712618 |
| 13 | 1 | 0 | 3.119446  | 2.235904  | -1.428043 |
| 14 | 6 | 0 | 1.178587  | 2.028204  | 1.206483  |
| 15 | 1 | 0 | 0.860228  | 3.064625  | 1.181323  |
| 16 | 1 | 0 | 1.362614  | 1.596833  | 2.188145  |
| 17 | 6 | 0 | -0.340649 | 0.033764  | 1.089737  |
| 18 | 7 | 0 | -0.449791 | -0.347399 | 2.423676  |
| 19 | 1 | 0 | -1.135912 | 0.139576  | 2.985002  |
| 20 | 6 | 0 | -1.614384 | 0.029267  | 0.295860  |
| 21 | 6 | 0 | -1.583034 | 0.449345  | -1.040018 |
| 22 | 6 | 0 | -2.827047 | -0.386651 | 0.854933  |
| 23 | 6 | 0 | -2.743979 | 0.458324  | -1.802859 |
| 24 | 1 | 0 | -0.647693 | 0.764639  | -1.486409 |
| 25 | 6 | 0 | -3.990083 | -0.375814 | 0.088511  |
| 26 | 1 | 0 | -2.863330 | -0.746647 | 1.874526  |
| 27 | 6 | 0 | -3.952956 | 0.047968  | -1.238497 |
| 28 | 1 | 0 | -2.706981 | 0.782988  | -2.835558 |
| 29 | 1 | 0 | -4.923103 | -0.708027 | 0.527507  |
| 30 | 1 | 0 | -4.858814 | 0.053329  | -1.832731 |
| 31 | 1 | 0 | 0.414690  | -0.524753 | 2.915957  |
| 32 | 1 | 0 | 3.932631  | 0.163860  | -0.893265 |
| 33 | 1 | 0 | 3.883045  | -2.262669 | -1.361143 |
| 34 | 1 | 0 | -0.015201 | 1.282218  | 1.061282  |

Imine monocation **9H<sup>+</sup>** (Intermediate-1)

E = -691.405906516

| Center Number | Atomic Number | Atomic Type | Coordinates (Angstroms) |           |           |
|---------------|---------------|-------------|-------------------------|-----------|-----------|
|               |               |             | X                       | Y         | Z         |
| 1             | 6             | 0           | 1.995461                | 2.511221  | 1.239462  |
| 2             | 6             | 0           | 1.956242                | 1.139720  | 1.008578  |
| 3             | 1             | 0           | 1.052884                | 4.398581  | 0.830991  |
| 4             | 6             | 0           | 1.035653                | 3.330294  | 0.652672  |
| 5             | 6             | 0           | 0.965141                | 0.621091  | 0.185000  |
| 6             | 6             | 0           | -0.015198               | 1.416097  | -0.422717 |
| 7             | 6             | 0           | 0.046037                | 2.786678  | -0.163667 |
| 8             | 1             | 0           | -0.708278               | 3.424628  | -0.602581 |
| 9             | 7             | 0           | 0.952406                | -0.827880 | -0.002894 |
| 10            | 6             | 0           | 0.496765                | -1.637718 | 1.146494  |
| 11            | 1             | 0           | -0.504265               | -1.308596 | 1.417060  |
| 12            | 1             | 0           | 0.499636                | -2.688213 | 0.870501  |
| 13            | 1             | 0           | 1.178741                | -1.456749 | 1.975939  |
| 14            | 6             | 0           | 1.335440                | -1.349987 | -1.102575 |
| 15            | 1             | 0           | 1.304854                | -2.425141 | -1.227005 |
| 16            | 1             | 0           | 1.688702                | -0.708951 | -1.899927 |
| 17            | 6             | 0           | -1.119221               | 0.815282  | -1.291208 |
| 18            | 7             | 0           | -1.927757               | 1.871344  | -1.915389 |
| 19            | 1             | 0           | -2.717606               | 1.441940  | -2.386692 |
| 20            | 6             | 0           | -2.023153               | -0.092503 | -0.470109 |
| 21            | 6             | 0           | -2.571182               | 0.353851  | 0.736475  |
| 22            | 6             | 0           | -2.313483               | -1.382748 | -0.914698 |
| 23            | 6             | 0           | -3.387950               | -0.483855 | 1.490784  |
| 24            | 1             | 0           | -2.346327               | 1.353220  | 1.089884  |
| 25            | 6             | 0           | -3.127489               | -2.226192 | -0.158355 |

|    |   |   |           |           |           |
|----|---|---|-----------|-----------|-----------|
| 26 | 1 | 0 | -1.895053 | -1.734615 | -1.851732 |
| 27 | 6 | 0 | -3.663210 | -1.778900 | 1.047379  |
| 28 | 1 | 0 | -3.803523 | -0.131019 | 2.427292  |
| 29 | 1 | 0 | -3.337710 | -3.229545 | -0.509272 |
| 30 | 1 | 0 | -4.290662 | -2.434010 | 1.640030  |
| 31 | 1 | 0 | -1.387514 | 2.351553  | -2.630733 |
| 32 | 1 | 0 | 2.693126  | 0.481399  | 1.451509  |
| 33 | 1 | 0 | 2.768843  | 2.928477  | 1.871449  |
| 34 | 1 | 0 | -0.641645 | 0.186978  | -2.053891 |

Imine monocation **9H<sup>+</sup>** (Conformer-2)

E = -691.431405661

| Center Number | Atomic Number | Atomic Type | Coordinates (Angstroms) |           |           |
|---------------|---------------|-------------|-------------------------|-----------|-----------|
|               |               |             | X                       | Y         | Z         |
| 1             | 6             | 0           | 3.542686                | 0.048595  | -0.692148 |
| 2             | 6             | 0           | 2.579717                | 1.013085  | -0.411168 |
| 3             | 1             | 0           | 4.070573                | -2.041357 | -0.598804 |
| 4             | 6             | 0           | 3.322206                | -1.291305 | -0.379539 |
| 5             | 6             | 0           | 1.365716                | 0.671899  | 0.190694  |
| 6             | 6             | 0           | 1.114744                | -0.706864 | 0.474998  |
| 7             | 6             | 0           | 2.117392                | -1.658350 | 0.194588  |
| 8             | 1             | 0           | 1.918252                | -2.703137 | 0.384018  |
| 9             | 7             | 0           | 0.394517                | 1.647920  | 0.494368  |
| 10            | 6             | 0           | 0.491991                | 2.926783  | -0.211755 |
| 11            | 1             | 0           | 0.605776                | 2.754040  | -1.281402 |
| 12            | 1             | 0           | -0.435913               | 3.474958  | -0.045566 |
| 13            | 1             | 0           | 1.324076                | 3.547090  | 0.146553  |
| 14            | 6             | 0           | 0.131800                | 1.848581  | 1.933733  |
| 15            | 1             | 0           | 0.914100                | 2.472897  | 2.382284  |
| 16            | 1             | 0           | -0.831635               | 2.344845  | 2.058133  |
| 17            | 1             | 0           | 0.105401                | 0.898913  | 2.462516  |
| 18            | 6             | 0           | -0.194400               | -1.219207 | 0.857854  |
| 19            | 7             | 0           | -1.277594               | -0.523409 | 0.627142  |
| 20            | 1             | 0           | -2.188674               | -0.865782 | 0.901172  |
| 21            | 6             | 0           | -0.357180               | -2.547066 | 1.470000  |
| 22            | 6             | 0           | 0.479085                | -2.934009 | 2.527303  |
| 23            | 6             | 0           | -1.381660               | -3.402375 | 1.039627  |
| 24            | 6             | 0           | 0.280828                | -4.159312 | 3.152206  |
| 25            | 1             | 0           | 1.260067                | -2.267861 | 2.870159  |
| 26            | 6             | 0           | -1.557905               | -4.635822 | 1.654955  |
| 27            | 1             | 0           | -2.010303               | -3.121359 | 0.203276  |
| 28            | 6             | 0           | -0.731722               | -5.012559 | 2.714025  |
| 29            | 1             | 0           | 0.916981                | -4.448449 | 3.979329  |
| 30            | 1             | 0           | -2.335164               | -5.303947 | 1.305845  |
| 31            | 1             | 0           | -0.875221               | -5.972258 | 3.195528  |
| 32            | 1             | 0           | -1.186185               | 0.410494  | 0.223194  |
| 33            | 1             | 0           | 2.789652                | 2.047177  | -0.641985 |
| 34            | 1             | 0           | 4.477492                | 0.353235  | -1.147648 |

Imine monocation **9H<sup>+</sup>** (Transition state-2)

E = -691.382561528

| Center Number | Atomic Number | Atomic Type | Coordinates (Angstroms) |   |   |
|---------------|---------------|-------------|-------------------------|---|---|
|               |               |             | X                       | Y | Z |

|    |   |   |           |           |           |
|----|---|---|-----------|-----------|-----------|
| 1  | 6 | 0 | -3.160602 | -1.824792 | -0.458745 |
| 2  | 6 | 0 | -2.980076 | -0.507341 | -0.848320 |
| 3  | 1 | 0 | -2.375715 | -3.468220 | 0.695538  |
| 4  | 6 | 0 | -2.236866 | -2.437861 | 0.393022  |
| 5  | 6 | 0 | -1.855731 | 0.198901  | -0.410835 |
| 6  | 6 | 0 | -0.902094 | -0.412000 | 0.429183  |
| 7  | 6 | 0 | -1.133925 | -1.729433 | 0.845036  |
| 8  | 1 | 0 | -0.418506 | -2.194334 | 1.511835  |
| 9  | 7 | 0 | -1.717409 | 1.584717  | -0.678944 |
| 10 | 6 | 0 | -2.832017 | 2.470203  | -0.299839 |
| 11 | 1 | 0 | -3.033795 | 2.389765  | 0.770614  |
| 12 | 1 | 0 | -2.569679 | 3.493477  | -0.557706 |
| 13 | 1 | 0 | -3.722649 | 2.185415  | -0.856626 |
| 14 | 6 | 0 | -0.455718 | 2.047065  | -0.695206 |
| 15 | 1 | 0 | -0.315995 | 3.116038  | -0.581458 |
| 16 | 1 | 0 | 0.257155  | 1.521325  | -1.323188 |
| 17 | 6 | 0 | 0.310675  | 0.303002  | 0.955737  |
| 18 | 1 | 0 | -3.700020 | -0.021657 | -1.493749 |
| 19 | 1 | 0 | -4.022189 | -2.375628 | -0.814742 |
| 20 | 1 | 0 | 0.101004  | 1.489640  | 0.499856  |
| 21 | 6 | 0 | 1.633221  | 0.019246  | 0.283686  |
| 22 | 6 | 0 | 1.756407  | -0.967122 | -0.697399 |
| 23 | 6 | 0 | 2.754640  | 0.781386  | 0.635575  |
| 24 | 6 | 0 | 2.991242  | -1.204856 | -1.300448 |
| 25 | 1 | 0 | 0.896784  | -1.556854 | -0.986023 |
| 26 | 6 | 0 | 3.984876  | 0.540249  | 0.035158  |
| 27 | 1 | 0 | 2.666176  | 1.581418  | 1.362506  |
| 28 | 6 | 0 | 4.106679  | -0.457481 | -0.933489 |
| 29 | 1 | 0 | 3.076808  | -1.976749 | -2.055679 |
| 30 | 1 | 0 | 4.845049  | 1.136321  | 0.314660  |
| 31 | 1 | 0 | 5.065090  | -0.643654 | -1.403043 |
| 32 | 7 | 0 | 0.370521  | 0.303623  | 2.343395  |
| 33 | 1 | 0 | 1.231520  | 0.605648  | 2.776765  |
| 34 | 1 | 0 | -0.462489 | 0.592903  | 2.837318  |

Imine monocation **9H<sup>+</sup>** (Intermediate-2)

E = -691.407187884

| Center<br>Number | Atomic<br>Number | Atomic<br>Type | Coordinates (Angstroms) |           |           |
|------------------|------------------|----------------|-------------------------|-----------|-----------|
|                  |                  |                | X                       | Y         | Z         |
| 1                | 6                | 0              | 3.321340                | 0.040546  | -1.591528 |
| 2                | 6                | 0              | 2.793541                | 0.762320  | -0.524461 |
| 3                | 1                | 0              | 3.078550                | -1.680746 | -2.854326 |
| 4                | 6                | 0              | 2.674465                | -1.113453 | -2.024648 |
| 5                | 6                | 0              | 1.633110                | 0.306171  | 0.085662  |
| 6                | 6                | 0              | 0.956939                | -0.847945 | -0.324910 |
| 7                | 6                | 0              | 1.508745                | -1.550032 | -1.397962 |
| 8                | 1                | 0              | 1.012621                | -2.450829 | -1.731648 |
| 9                | 7                | 0              | 1.099294                | 1.087451  | 1.197734  |
| 10               | 6                | 0              | 0.259319                | 2.248642  | 0.845142  |
| 11               | 1                | 0              | -0.558653               | 1.903886  | 0.214324  |
| 12               | 1                | 0              | -0.121534               | 2.709140  | 1.752691  |
| 13               | 1                | 0              | 0.873609                | 2.952465  | 0.285025  |
| 14               | 6                | 0              | 1.351304                | 0.755444  | 2.406492  |
| 15               | 1                | 0              | 0.935392                | 1.336289  | 3.219663  |
| 16               | 1                | 0              | 1.997587                | -0.089279 | 2.602021  |
| 17               | 6                | 0              | -0.300514               | -1.328167 | 0.393996  |

|    |   |   |           |           |           |
|----|---|---|-----------|-----------|-----------|
| 18 | 1 | 0 | 3.277048  | 1.662039  | -0.164593 |
| 19 | 1 | 0 | 4.228427  | 0.380482  | -2.074705 |
| 20 | 1 | 0 | -0.950503 | -0.455680 | 0.543291  |
| 21 | 6 | 0 | 0.033808  | -1.868087 | 1.778672  |
| 22 | 6 | 0 | 1.054552  | -2.806537 | 1.954730  |
| 23 | 6 | 0 | -0.676596 | -1.414997 | 2.893780  |
| 24 | 6 | 0 | 1.366869  | -3.273873 | 3.228149  |
| 25 | 1 | 0 | 1.613413  | -3.158718 | 1.095993  |
| 26 | 6 | 0 | -0.362502 | -1.880570 | 4.171879  |
| 27 | 1 | 0 | -1.474547 | -0.692002 | 2.761986  |
| 28 | 6 | 0 | 0.662587  | -2.807728 | 4.340643  |
| 29 | 1 | 0 | 2.164628  | -3.996062 | 3.355794  |
| 30 | 1 | 0 | -0.915632 | -1.515945 | 5.029174  |
| 31 | 1 | 0 | 0.914104  | -3.166385 | 5.331616  |
| 32 | 7 | 0 | -0.979647 | -2.372413 | -0.383564 |
| 33 | 1 | 0 | -1.753508 | -2.739597 | 0.161187  |
| 34 | 1 | 0 | -1.378711 | -1.974277 | -1.229809 |

Imine dication **7a**2H<sup>+</sup>

E = -979.580720817

| Center<br>Number | Atomic<br>Number | Atomic<br>Type | Coordinates (Angstroms) |           |           |
|------------------|------------------|----------------|-------------------------|-----------|-----------|
|                  |                  |                | X                       | Y         | Z         |
| 1                | 6                | 0              | -4.639803               | -1.099361 | 0.090351  |
| 2                | 6                | 0              | -3.344235               | -1.252252 | -0.327362 |
| 3                | 6                | 0              | -2.504231               | -0.128706 | -0.525214 |
| 4                | 6                | 0              | -3.003046               | 1.202601  | -0.319200 |
| 5                | 6                | 0              | -4.348653               | 1.295932  | 0.155472  |
| 6                | 6                | 0              | -5.137485               | 0.191786  | 0.348147  |
| 7                | 1                | 0              | -0.788903               | -1.335136 | -1.032146 |
| 8                | 1                | 0              | -5.280101               | -1.958287 | 0.242468  |
| 9                | 1                | 0              | -2.934125               | -2.238730 | -0.505335 |
| 10               | 6                | 0              | -1.152858               | -0.324541 | -0.896385 |
| 11               | 6                | 0              | -2.127050               | 2.314724  | -0.576615 |
| 12               | 1                | 0              | -6.150072               | 0.303523  | 0.713524  |
| 13               | 6                | 0              | -0.808982               | 2.059890  | -0.928269 |
| 14               | 6                | 0              | -0.312925               | 0.738520  | -1.060320 |
| 15               | 1                | 0              | 0.726311                | 0.587318  | -1.321846 |
| 16               | 7                | 0              | -2.654828               | 3.650050  | -0.406556 |
| 17               | 7                | 0              | -4.905903               | 2.618366  | 0.500733  |
| 18               | 6                | 0              | -5.142755               | 2.776198  | 1.972451  |
| 19               | 1                | 0              | -5.427020               | 3.809604  | 2.159404  |
| 20               | 1                | 0              | -5.938756               | 2.104746  | 2.285137  |
| 21               | 1                | 0              | -4.222787               | 2.536895  | 2.500346  |
| 22               | 6                | 0              | -6.114501               | 2.982828  | -0.305142 |
| 23               | 1                | 0              | -6.945806               | 2.339384  | -0.026411 |
| 24               | 1                | 0              | -6.362647               | 4.020834  | -0.094530 |
| 25               | 1                | 0              | -5.883855               | 2.853771  | -1.359405 |
| 26               | 6                | 0              | -1.942975               | 4.525648  | 0.541277  |
| 27               | 1                | 0              | -1.035490               | 4.966473  | 0.117848  |
| 28               | 1                | 0              | -2.612060               | 5.341065  | 0.820627  |
| 29               | 1                | 0              | -1.686823               | 3.962948  | 1.437570  |
| 30               | 6                | 0              | -3.052636               | 4.352906  | -1.646538 |
| 31               | 1                | 0              | -3.827183               | 5.083627  | -1.407460 |
| 32               | 1                | 0              | -2.216018               | 4.892109  | -2.098587 |
| 33               | 1                | 0              | -3.449216               | 3.638127  | -2.366202 |
| 34               | 6                | 0              | 0.184443                | 3.127228  | -1.217576 |
| 35               | 7                | 0              | 0.057273                | 3.777135  | -2.339984 |

|    |   |   |           |          |           |
|----|---|---|-----------|----------|-----------|
| 36 | 1 | 0 | 0.683745  | 4.527319 | -2.607891 |
| 37 | 6 | 0 | 1.286097  | 3.367958 | -0.308546 |
| 38 | 6 | 0 | 1.220665  | 2.840255 | 0.995481  |
| 39 | 6 | 0 | 2.413769  | 4.120946 | -0.695380 |
| 40 | 6 | 0 | 2.246876  | 3.080152 | 1.896440  |
| 41 | 1 | 0 | 0.363356  | 2.256404 | 1.300670  |
| 42 | 6 | 0 | 3.436310  | 4.350088 | 0.208376  |
| 43 | 1 | 0 | 2.515342  | 4.501934 | -1.703632 |
| 44 | 6 | 0 | 3.352034  | 3.835367 | 1.505694  |
| 45 | 1 | 0 | 2.187157  | 2.679504 | 2.899977  |
| 46 | 1 | 0 | 4.304806  | 4.920134 | -0.094999 |
| 47 | 1 | 0 | 4.155486  | 4.018556 | 2.208655  |
| 48 | 1 | 0 | -0.652156 | 3.516180 | -3.013683 |
| 49 | 1 | 0 | -4.100498 | 3.270389 | 0.225943  |

Imine dication **7a**2H<sup>+</sup> (Transition state-1)

E = 979.530439375

| Center<br>Number | Atomic<br>Number | Atomic<br>Type | Coordinates (Angstroms) |           |           |
|------------------|------------------|----------------|-------------------------|-----------|-----------|
|                  |                  |                | X                       | Y         | Z         |
| 1                | 6                | 0              | 4.060088                | 1.929878  | 0.649293  |
| 2                | 6                | 0              | 2.954346                | 2.654799  | 0.283596  |
| 3                | 6                | 0              | 1.750199                | 2.007679  | -0.080196 |
| 4                | 6                | 0              | 1.682378                | 0.577347  | -0.104102 |
| 5                | 6                | 0              | 2.828405                | -0.124804 | 0.365917  |
| 6                | 6                | 0              | 3.982378                | 0.527337  | 0.721773  |
| 7                | 1                | 0              | 0.662955                | 3.846921  | -0.371255 |
| 8                | 1                | 0              | 4.982437                | 2.424458  | 0.922994  |
| 9                | 1                | 0              | 2.981994                | 3.737357  | 0.276807  |
| 10               | 6                | 0              | 0.595112                | 2.766637  | -0.403828 |
| 11               | 6                | 0              | 0.461075                | -0.007294 | -0.560361 |
| 12               | 1                | 0              | 4.834716                | -0.025328 | 1.092332  |
| 13               | 6                | 0              | -0.679283               | 0.749252  | -0.789076 |
| 14               | 6                | 0              | -0.588361               | 2.160574  | -0.716930 |
| 15               | 1                | 0              | -1.474354               | 2.742468  | -0.933113 |
| 16               | 7                | 0              | 0.415165                | -1.382662 | -0.980688 |
| 17               | 7                | 0              | 2.752224                | -1.582685 | 0.643303  |
| 18               | 6                | 0              | 2.611361                | -1.847758 | 2.123922  |
| 19               | 1                | 0              | 2.438078                | -2.912567 | 2.259683  |
| 20               | 1                | 0              | 3.530681                | -1.542275 | 2.615416  |
| 21               | 1                | 0              | 1.769966                | -1.269376 | 2.495710  |
| 22               | 6                | 0              | 3.874900                | -2.390283 | 0.043432  |
| 23               | 1                | 0              | 4.792874                | -2.175279 | 0.581749  |
| 24               | 1                | 0              | 3.619664                | -3.441890 | 0.148944  |
| 25               | 1                | 0              | 3.978601                | -2.123151 | -1.004121 |
| 26               | 6                | 0              | -0.721509               | -2.028529 | -0.722354 |
| 27               | 1                | 0              | -0.953153               | -2.916457 | -1.298795 |
| 28               | 1                | 0              | -1.167816               | -1.904258 | 0.256591  |
| 29               | 6                | 0              | 1.133168                | -1.687813 | -2.250090 |
| 30               | 1                | 0              | 1.273542                | -2.763579 | -2.327361 |
| 31               | 1                | 0              | 0.551795                | -1.317395 | -3.095589 |
| 32               | 1                | 0              | 2.095131                | -1.182584 | -2.242117 |
| 33               | 6                | 0              | -2.006602               | 0.144103  | -1.168646 |
| 34               | 7                | 0              | -2.541856               | 0.728907  | -2.331875 |
| 35               | 1                | 0              | -3.506433               | 0.501444  | -2.532574 |
| 36               | 6                | 0              | -3.017232               | 0.035772  | -0.039791 |
| 37               | 6                | 0              | -2.795841               | 0.608015  | 1.213991  |
| 38               | 6                | 0              | -4.195268               | -0.686154 | -0.267407 |

|    |   |   |           |           |           |
|----|---|---|-----------|-----------|-----------|
| 39 | 6 | 0 | -3.753206 | 0.480074  | 2.220277  |
| 40 | 1 | 0 | -1.886547 | 1.159035  | 1.413151  |
| 41 | 6 | 0 | -5.149210 | -0.809771 | 0.736435  |
| 42 | 1 | 0 | -4.362313 | -1.171391 | -1.223051 |
| 43 | 6 | 0 | -4.930838 | -0.223191 | 1.983791  |
| 44 | 1 | 0 | -3.573915 | 0.933107  | 3.187801  |
| 45 | 1 | 0 | -6.056438 | -1.371082 | 0.548893  |
| 46 | 1 | 0 | -5.672673 | -0.321494 | 2.767143  |
| 47 | 1 | 0 | -1.955296 | 0.675623  | -3.154866 |
| 48 | 1 | 0 | 1.886706  | -1.922529 | 0.216466  |
| 49 | 1 | 0 | -1.745298 | -1.019927 | -1.353889 |

Imine dication **7a**2H<sup>+</sup> (Intermediate-1)

E = -979.534295697

| Center Number | Atomic Number | Atomic Type | Coordinates (Angstroms) |           |           |
|---------------|---------------|-------------|-------------------------|-----------|-----------|
|               |               |             | X                       | Y         | Z         |
| 1             | 6             | 0           | 3.818119                | 2.237813  | 0.161502  |
| 2             | 6             | 0           | 2.619310                | 2.790104  | -0.208293 |
| 3             | 6             | 0           | 1.473687                | 1.983787  | -0.395949 |
| 4             | 6             | 0           | 1.544289                | 0.559421  | -0.235570 |
| 5             | 6             | 0           | 2.790219                | 0.051526  | 0.239986  |
| 6             | 6             | 0           | 3.887369                | 0.859996  | 0.417559  |
| 7             | 1             | 0           | 0.207785                | 3.672743  | -0.826732 |
| 8             | 1             | 0           | 4.698323                | 2.851151  | 0.298635  |
| 9             | 1             | 0           | 2.525164                | 3.858672  | -0.355823 |
| 10            | 6             | 0           | 0.236218                | 2.595011  | -0.724329 |
| 11            | 6             | 0           | 0.347923                | -0.175495 | -0.542677 |
| 12            | 1             | 0           | 4.813933                | 0.447063  | 0.791451  |
| 13            | 6             | 0           | -0.859999               | 0.442552  | -0.819434 |
| 14            | 6             | 0           | -0.897680               | 1.856484  | -0.883735 |
| 15            | 1             | 0           | -1.845315               | 2.327872  | -1.105042 |
| 16            | 7             | 0           | 0.424674                | -1.612401 | -0.768218 |
| 17            | 7             | 0           | 2.933991                | -1.349876 | 0.721476  |
| 18            | 6             | 0           | 2.909201                | -1.412325 | 2.233944  |
| 19            | 1             | 0           | 2.898566                | -2.460277 | 2.524938  |
| 20            | 1             | 0           | 3.800672                | -0.916590 | 2.606831  |
| 21            | 1             | 0           | 2.015742                | -0.902516 | 2.583357  |
| 22            | 6             | 0           | 4.133167                | -2.079385 | 0.164666  |
| 23            | 1             | 0           | 5.035851                | -1.651888 | 0.588087  |
| 24            | 1             | 0           | 4.045702                | -3.123274 | 0.453383  |
| 25            | 1             | 0           | 4.133440                | -1.975941 | -0.916446 |
| 26            | 6             | 0           | -0.294352               | -2.446592 | -0.103417 |
| 27            | 1             | 0           | -0.329356               | -3.484311 | -0.412399 |
| 28            | 1             | 0           | -0.828516               | -2.113800 | 0.776336  |
| 29            | 6             | 0           | 1.151975                | -2.034246 | -1.998928 |
| 30            | 1             | 0           | 1.390766                | -3.092201 | -1.932747 |
| 31            | 1             | 0           | 0.507005                | -1.837926 | -2.853348 |
| 32            | 1             | 0           | 2.052704                | -1.434361 | -2.096560 |
| 33            | 6             | 0           | -2.175383               | -0.270799 | -1.096990 |
| 34            | 7             | 0           | -2.664085               | 0.143958  | -2.413148 |
| 35            | 1             | 0           | -3.490352               | -0.389901 | -2.664194 |
| 36            | 6             | 0           | -3.171849               | 0.061306  | 0.018516  |
| 37            | 6             | 0           | -2.765502               | -0.003645 | 1.356410  |
| 38            | 6             | 0           | -4.494392               | 0.406206  | -0.263996 |
| 39            | 6             | 0           | -3.663340               | 0.250491  | 2.388800  |
| 40            | 1             | 0           | -1.733470               | -0.221090 | 1.605758  |
| 41            | 6             | 0           | -5.395771               | 0.662645  | 0.770031  |



|    |   |   |           |           |           |
|----|---|---|-----------|-----------|-----------|
| 42 | 1 | 0 | -4.832447 | 0.492093  | -1.287518 |
| 43 | 6 | 0 | -4.986206 | 0.582698  | 2.098260  |
| 44 | 1 | 0 | -3.326294 | 0.199902  | 3.417331  |
| 45 | 1 | 0 | -6.418602 | 0.929602  | 0.531395  |
| 46 | 1 | 0 | -5.686698 | 0.785462  | 2.899573  |
| 47 | 1 | 0 | -1.966822 | -0.058138 | -3.122541 |
| 48 | 1 | 0 | 2.122372  | -1.877765 | 0.415451  |
| 49 | 1 | 0 | -2.032219 | -1.360552 | -1.063574 |

Imine dication **7a**2H<sup>+</sup> (Transition state-2)

E = -979.527205714

| Center<br>Number | Atomic<br>Number | Atomic<br>Type | Coordinates (Angstroms) |           |           |
|------------------|------------------|----------------|-------------------------|-----------|-----------|
|                  |                  |                | X                       | Y         | Z         |
| 1                | 6                | 0              | -4.094340               | 1.685621  | -1.139669 |
| 2                | 6                | 0              | -2.993286               | 2.483223  | -0.970070 |
| 3                | 6                | 0              | -1.790329               | 1.959315  | -0.436842 |
| 4                | 6                | 0              | -1.699807               | 0.567692  | -0.091042 |
| 5                | 6                | 0              | -2.893464               | -0.199606 | -0.227726 |
| 6                | 6                | 0              | -4.046388               | 0.336165  | -0.740427 |
| 7                | 1                | 0              | -0.772650               | 3.856547  | -0.469562 |
| 8                | 1                | 0              | -5.012462               | 2.084923  | -1.549282 |
| 9                | 1                | 0              | -3.026520               | 3.533196  | -1.233357 |
| 10               | 6                | 0              | -0.678659               | 2.807483  | -0.218004 |
| 11               | 6                | 0              | -0.438854               | 0.104987  | 0.376619  |
| 12               | 1                | 0              | -4.941263               | -0.265593 | -0.824939 |
| 13               | 6                | 0              | 0.621167                | 0.959246  | 0.620262  |
| 14               | 6                | 0              | 0.486758                | 2.330970  | 0.322207  |
| 15               | 1                | 0              | 1.324391                | 2.988336  | 0.514392  |
| 16               | 7                | 0              | -0.150802               | -1.310157 | 0.548789  |
| 17               | 7                | 0              | -2.952997               | -1.590779 | 0.285631  |
| 18               | 6                | 0              | -3.419996               | -2.595165 | -0.734911 |
| 19               | 1                | 0              | -3.276172               | -3.587819 | -0.316023 |
| 20               | 1                | 0              | -4.472175               | -2.426979 | -0.943312 |
| 21               | 1                | 0              | -2.832068               | -2.469271 | -1.639623 |
| 22               | 6                | 0              | -3.749861               | -1.680135 | 1.564899  |
| 23               | 1                | 0              | -4.786991               | -1.443957 | 1.344127  |
| 24               | 1                | 0              | -3.660580               | -2.695053 | 1.945348  |
| 25               | 1                | 0              | -3.338670               | -0.965567 | 2.273191  |
| 26               | 6                | 0              | 0.480009                | -1.595849 | 1.693388  |
| 27               | 1                | 0              | 1.010476                | -2.538652 | 1.767960  |
| 28               | 1                | 0              | 0.117598                | -1.122587 | 2.599623  |
| 29               | 6                | 0              | 0.251393                | -2.043116 | -0.684965 |
| 30               | 1                | 0              | 0.209219                | -3.111604 | -0.485227 |
| 31               | 1                | 0              | -0.440834               | -1.787355 | -1.483233 |
| 32               | 1                | 0              | 1.257413                | -1.751517 | -0.984716 |
| 33               | 6                | 0              | 1.947998                | 0.460560  | 1.164363  |
| 34               | 7                | 0              | 2.447621                | 1.284575  | 2.182695  |
| 35               | 1                | 0              | 3.369767                | 1.044199  | 2.522043  |
| 36               | 6                | 0              | 2.995945                | 0.100563  | 0.128650  |
| 37               | 6                | 0              | 2.907778                | 0.550902  | -1.190094 |
| 38               | 6                | 0              | 4.073086                | -0.703744 | 0.513898  |
| 39               | 6                | 0              | 3.898893                | 0.212036  | -2.109087 |
| 40               | 1                | 0              | 2.072328                | 1.160413  | -1.508179 |
| 41               | 6                | 0              | 5.060397                | -1.041662 | -0.405936 |
| 42               | 1                | 0              | 4.131495                | -1.084469 | 1.527992  |
| 43               | 6                | 0              | 4.975273                | -0.582583 | -1.720421 |
| 44               | 1                | 0              | 3.825563                | 0.568617  | -3.129314 |

|    |   |   |           |           |           |
|----|---|---|-----------|-----------|-----------|
| 45 | 1 | 0 | 5.888365  | -1.669333 | -0.099811 |
| 46 | 1 | 0 | 5.740845  | -0.849364 | -2.438971 |
| 47 | 1 | 0 | 1.802646  | 1.508871  | 2.931002  |
| 48 | 1 | 0 | -1.993309 | -1.848173 | 0.538954  |
| 49 | 1 | 0 | 1.666028  | -0.628696 | 1.628859  |

Imine dication **7a**2H<sup>+</sup> (Intermediate-2)

E = -979.534546105

| Center<br>Number | Atomic<br>Number | Atomic<br>Type | Coordinates (Angstroms) |           |           |
|------------------|------------------|----------------|-------------------------|-----------|-----------|
|                  |                  |                | X                       | Y         | Z         |
| 1                | 6                | 0              | 3.516279                | 2.467451  | 0.973336  |
| 2                | 6                | 0              | 2.264421                | 2.886199  | 0.609411  |
| 3                | 6                | 0              | 1.281617                | 1.964087  | 0.183713  |
| 4                | 6                | 0              | 1.555689                | 0.551325  | 0.132769  |
| 5                | 6                | 0              | 2.896878                | 0.182261  | 0.465729  |
| 6                | 6                | 0              | 3.828899                | 1.104655  | 0.878668  |
| 7                | 1                | 0              | -0.149894               | 3.529076  | -0.178425 |
| 8                | 1                | 0              | 4.269937                | 3.168520  | 1.305155  |
| 9                | 1                | 0              | 2.002630                | 3.936475  | 0.636607  |
| 10               | 6                | 0              | 0.013425                | 2.459040  | -0.211564 |
| 11               | 6                | 0              | 0.450894                | -0.280262 | -0.264671 |
| 12               | 1                | 0              | 4.834280                | 0.787816  | 1.119126  |
| 13               | 6                | 0              | -0.787595               | 0.221878  | -0.624692 |
| 14               | 6                | 0              | -0.979429               | 1.622762  | -0.621888 |
| 15               | 1                | 0              | -1.942578               | 2.011905  | -0.920362 |
| 16               | 7                | 0              | 0.561053                | -1.740369 | -0.212054 |
| 17               | 7                | 0              | 3.421316                | -1.205030 | 0.320678  |
| 18               | 6                | 0              | 3.970206                | -1.779111 | 1.606920  |
| 19               | 1                | 0              | 4.134471                | -2.842380 | 1.451792  |
| 20               | 1                | 0              | 4.907479                | -1.284317 | 1.839782  |
| 21               | 1                | 0              | 3.250334                | -1.608015 | 2.401521  |
| 22               | 6                | 0              | 4.433595                | -1.307577 | -0.801002 |
| 23               | 1                | 0              | 5.304568                | -0.717986 | -0.533269 |
| 24               | 1                | 0              | 4.701096                | -2.355347 | -0.914650 |
| 25               | 1                | 0              | 3.974482                | -0.921904 | -1.707302 |
| 26               | 6                | 0              | 0.602735                | -2.440395 | -1.286599 |
| 27               | 1                | 0              | 0.567373                | -3.521746 | -1.224776 |
| 28               | 1                | 0              | 0.692003                | -1.940300 | -2.242299 |
| 29               | 6                | 0              | 0.382486                | -2.369268 | 1.124168  |
| 30               | 1                | 0              | 0.773703                | -3.383173 | 1.112731  |
| 31               | 1                | 0              | 0.883685                | -1.756939 | 1.867895  |
| 32               | 1                | 0              | -0.683934               | -2.378921 | 1.343380  |
| 33               | 6                | 0              | -1.989931               | -0.637661 | -1.017093 |
| 34               | 7                | 0              | -2.221987               | -0.456528 | -2.454079 |
| 35               | 1                | 0              | -2.974445               | -1.065350 | -2.763104 |
| 36               | 6                | 0              | -3.216966               | -0.225814 | -0.205428 |
| 37               | 6                | 0              | -3.295872               | -0.583015 | 1.143874  |
| 38               | 6                | 0              | -4.254282               | 0.519405  | -0.768070 |
| 39               | 6                | 0              | -4.385973               | -0.200790 | 1.919356  |
| 40               | 1                | 0              | -2.501567               | -1.160626 | 1.601737  |
| 41               | 6                | 0              | -5.350670               | 0.900418  | 0.006550  |
| 42               | 1                | 0              | -4.201019               | 0.806196  | -1.809878 |
| 43               | 6                | 0              | -5.419841               | 0.544406  | 1.351024  |
| 44               | 1                | 0              | -4.429983               | -0.486508 | 2.963675  |
| 45               | 1                | 0              | -6.149553               | 1.477464  | -0.444479 |
| 46               | 1                | 0              | -6.271215               | 0.841376  | 1.951963  |
| 47               | 1                | 0              | -1.398402               | -0.701443 | -2.992865 |

|    |   |   |           |           |           |
|----|---|---|-----------|-----------|-----------|
| 48 | 1 | 0 | 2.658595  | -1.813215 | 0.043698  |
| 49 | 1 | 0 | -1.794678 | -1.683429 | -0.758314 |

Imine monocation **7aH<sup>+</sup>**

E = -979.131973939

| Center<br>Number | Atomic<br>Number | Atomic<br>Type | Coordinates (Angstroms) |           |           |
|------------------|------------------|----------------|-------------------------|-----------|-----------|
|                  |                  |                | X                       | Y         | Z         |
| 1                | 6                | 0              | 3.939701                | 2.185579  | -0.672095 |
| 2                | 6                | 0              | 2.698805                | 2.774253  | -0.544198 |
| 3                | 6                | 0              | 1.567539                | 1.972558  | -0.302657 |
| 4                | 6                | 0              | 1.692182                | 0.541042  | -0.233869 |
| 5                | 6                | 0              | 3.031636                | 0.002315  | -0.078668 |
| 6                | 6                | 0              | 4.113178                | 0.821699  | -0.410189 |
| 7                | 1                | 0              | 0.233035                | 3.655882  | -0.031937 |
| 8                | 1                | 0              | 4.810718                | 2.792626  | -0.890966 |
| 9                | 1                | 0              | 2.577831                | 3.847527  | -0.624893 |
| 10               | 6                | 0              | 0.295153                | 2.575791  | -0.084379 |
| 11               | 6                | 0              | 0.490003                | -0.247253 | -0.342371 |
| 12               | 1                | 0              | 5.117878                | 0.427888  | -0.366416 |
| 13               | 6                | 0              | -0.764875               | 0.402971  | -0.201843 |
| 14               | 6                | 0              | -0.820201               | 1.812394  | 0.049092  |
| 15               | 1                | 0              | -1.782921               | 2.279350  | 0.203721  |
| 16               | 7                | 0              | 0.541723                | -1.608566 | -0.584606 |
| 17               | 7                | 0              | 3.240963                | -1.275140 | 0.409676  |
| 18               | 6                | 0              | 2.551599                | -1.681775 | 1.634863  |
| 19               | 1                | 0              | 2.285647                | -2.739501 | 1.587889  |
| 20               | 1                | 0              | 3.207976                | -1.530102 | 2.502477  |
| 21               | 1                | 0              | 1.650507                | -1.096082 | 1.785996  |
| 22               | 6                | 0              | 4.559345                | -1.875931 | 0.280649  |
| 23               | 1                | 0              | 5.295583                | -1.438539 | 0.970403  |
| 24               | 1                | 0              | 4.474197                | -2.939816 | 0.507132  |
| 25               | 1                | 0              | 4.925344                | -1.772626 | -0.741097 |
| 26               | 6                | 0              | -0.310790               | -2.574712 | 0.091848  |
| 27               | 1                | 0              | -1.058053               | -3.018461 | -0.575336 |
| 28               | 1                | 0              | 0.313767                | -3.385883 | 0.475528  |
| 29               | 1                | 0              | -0.824253               | -2.108593 | 0.930812  |
| 30               | 6                | 0              | 1.442936                | -2.193911 | -1.569105 |
| 31               | 1                | 0              | 2.151898                | -2.883232 | -1.106479 |
| 32               | 1                | 0              | 0.847218                | -2.748751 | -2.304549 |
| 33               | 1                | 0              | 1.996256                | -1.415735 | -2.088354 |
| 34               | 6                | 0              | -2.028470               | -0.192771 | -0.568303 |
| 35               | 7                | 0              | -2.129850               | -1.031265 | -1.579809 |
| 36               | 1                | 0              | -3.002519               | -1.492867 | -1.794619 |
| 37               | 6                | 0              | -3.268975               | 0.173954  | 0.128766  |
| 38               | 6                | 0              | -3.246822               | 0.370133  | 1.517921  |
| 39               | 6                | 0              | -4.479958               | 0.295977  | -0.570195 |
| 40               | 6                | 0              | -4.421442               | 0.668460  | 2.196932  |
| 41               | 1                | 0              | -2.314548               | 0.269401  | 2.058313  |
| 42               | 6                | 0              | -5.648570               | 0.608234  | 0.113202  |
| 43               | 1                | 0              | -4.501938               | 0.189181  | -1.648024 |
| 44               | 6                | 0              | -5.621772               | 0.789671  | 1.496412  |
| 45               | 1                | 0              | -4.401651               | 0.805484  | 3.270876  |
| 46               | 1                | 0              | -6.577199               | 0.719143  | -0.432558 |
| 47               | 1                | 0              | -6.535147               | 1.030215  | 2.026952  |
| 48               | 1                | 0              | -1.328894               | -1.252596 | -2.154328 |

Imine monocation **7aH<sup>+</sup>**(Transition state-1)

E = -979.094106047

| Center<br>Number | Atomic<br>Number | Atomic<br>Type | Coordinates (Angstroms) |           |           |
|------------------|------------------|----------------|-------------------------|-----------|-----------|
|                  |                  |                | X                       | Y         | Z         |
| 1                | 6                | 0              | -4.214192               | 1.722965  | -0.726235 |
| 2                | 6                | 0              | -3.121670               | 2.534121  | -0.543530 |
| 3                | 6                | 0              | -1.871741               | 1.967095  | -0.196436 |
| 4                | 6                | 0              | -1.749706               | 0.553003  | -0.025415 |
| 5                | 6                | 0              | -2.871574               | -0.283366 | -0.367505 |
| 6                | 6                | 0              | -4.084328               | 0.323131  | -0.661614 |
| 7                | 1                | 0              | -0.835477               | 3.861738  | -0.168453 |
| 8                | 1                | 0              | -5.178525               | 2.151665  | -0.972515 |
| 9                | 1                | 0              | -3.197851               | 3.609280  | -0.651330 |
| 10               | 6                | 0              | -0.734433               | 2.796112  | 0.000262  |
| 11               | 6                | 0              | -0.507329               | 0.058051  | 0.489752  |
| 12               | 1                | 0              | -4.942685               | -0.289570 | -0.899158 |
| 13               | 6                | 0              | 0.609226                | 0.884070  | 0.627915  |
| 14               | 6                | 0              | 0.469301                | 2.272466  | 0.376569  |
| 15               | 1                | 0              | 1.335527                | 2.908010  | 0.508298  |
| 16               | 7                | 0              | -0.414331               | -1.238721 | 1.057901  |
| 17               | 7                | 0              | -2.718675               | -1.679860 | -0.393916 |
| 18               | 6                | 0              | -1.790790               | -2.206409 | -1.398565 |
| 19               | 1                | 0              | -1.412963               | -3.179535 | -1.077391 |
| 20               | 1                | 0              | -2.291098               | -2.326030 | -2.370734 |
| 21               | 1                | 0              | -0.947563               | -1.533817 | -1.536343 |
| 22               | 6                | 0              | -3.920385               | -2.492993 | -0.283009 |
| 23               | 1                | 0              | -4.530948               | -2.490536 | -1.199148 |
| 24               | 1                | 0              | -3.620358               | -3.523747 | -0.084314 |
| 25               | 1                | 0              | -4.533191               | -2.145159 | 0.549344  |
| 26               | 6                | 0              | 0.793783                | -1.821305 | 0.986158  |
| 27               | 1                | 0              | 0.984224                | -2.644381 | 1.666656  |
| 28               | 1                | 0              | 1.263100                | -1.875102 | 0.008535  |
| 29               | 6                | 0              | -1.278963               | -1.545605 | 2.213379  |
| 30               | 1                | 0              | -1.493034               | -2.612001 | 2.223874  |
| 31               | 1                | 0              | -0.774324               | -1.249368 | 3.137243  |
| 32               | 1                | 0              | -2.208425               | -0.995833 | 2.118131  |
| 33               | 6                | 0              | 1.944820                | 0.407635  | 1.116446  |
| 34               | 7                | 0              | 2.413718                | 1.123615  | 2.210382  |
| 35               | 1                | 0              | 3.376723                | 0.988307  | 2.482742  |
| 36               | 6                | 0              | 2.993025                | 0.121219  | 0.068337  |
| 37               | 6                | 0              | 2.755805                | 0.381828  | -1.283515 |
| 38               | 6                | 0              | 4.214370                | -0.446994 | 0.452952  |
| 39               | 6                | 0              | 3.735622                | 0.099933  | -2.234754 |
| 40               | 1                | 0              | 1.814644                | 0.814431  | -1.595575 |
| 41               | 6                | 0              | 5.190702                | -0.724038 | -0.497170 |
| 42               | 1                | 0              | 4.399804                | -0.699302 | 1.491238  |
| 43               | 6                | 0              | 4.954382                | -0.448046 | -1.844882 |
| 44               | 1                | 0              | 3.542935                | 0.312937  | -3.279303 |
| 45               | 1                | 0              | 6.130757                | -1.164643 | -0.188035 |
| 46               | 1                | 0              | 5.714958                | -0.666052 | -2.584959 |
| 47               | 1                | 0              | 1.778886                | 1.237095  | 2.988452  |
| 48               | 1                | 0              | 1.653967                | -0.811123 | 1.445069  |

Imine monocation **7aH<sup>+</sup>**(Intermediate-1)

E = -979.112420949

| Center | Atomic | Atomic | Coordinates (Angstroms) |   |   |
|--------|--------|--------|-------------------------|---|---|
|        |        |        | X                       | Y | Z |

| Number | Number | Type | X         | Y         | Z         |
|--------|--------|------|-----------|-----------|-----------|
| 1      | 6      | 0    | 3.746760  | 2.531782  | 0.210818  |
| 2      | 6      | 0    | 2.478523  | 3.017234  | 0.010170  |
| 3      | 6      | 0    | 1.390250  | 2.126166  | -0.153285 |
| 4      | 6      | 0    | 1.613786  | 0.714891  | -0.116058 |
| 5      | 6      | 0    | 2.924199  | 0.241208  | 0.219914  |
| 6      | 6      | 0    | 3.963146  | 1.145798  | 0.335961  |
| 7      | 1      | 0    | -0.084778 | 3.686985  | -0.371975 |
| 8      | 1      | 0    | 4.583732  | 3.211405  | 0.316548  |
| 9      | 1      | 0    | 2.290127  | 4.083051  | -0.036679 |
| 10     | 6      | 0    | 0.076077  | 2.615263  | -0.371373 |
| 11     | 6      | 0    | 0.501563  | -0.133988 | -0.428615 |
| 12     | 1      | 0    | 4.957122  | 0.786274  | 0.566809  |
| 13     | 6      | 0    | -0.774019 | 0.358171  | -0.641348 |
| 14     | 6      | 0    | -0.969313 | 1.761591  | -0.575406 |
| 15     | 1      | 0    | -1.970008 | 2.141861  | -0.732543 |
| 16     | 7      | 0    | 0.753390  | -1.546910 | -0.682174 |
| 17     | 7      | 0    | 3.106811  | -1.147228 | 0.431799  |
| 18     | 6      | 0    | 2.606861  | -1.631967 | 1.716710  |
| 19     | 1      | 0    | 2.419396  | -2.709233 | 1.656317  |
| 20     | 1      | 0    | 3.328695  | -1.454082 | 2.526048  |
| 21     | 1      | 0    | 1.680882  | -1.123054 | 1.982661  |
| 22     | 6      | 0    | 4.409692  | -1.709529 | 0.095290  |
| 23     | 1      | 0    | 5.191783  | -1.450869 | 0.823456  |
| 24     | 1      | 0    | 4.321385  | -2.797807 | 0.071835  |
| 25     | 1      | 0    | 4.719123  | -1.363945 | -0.891351 |
| 26     | 6      | 0    | 0.214905  | -2.468713 | 0.022191  |
| 27     | 1      | 0    | 0.345089  | -3.504341 | -0.263980 |
| 28     | 1      | 0    | -0.350733 | -2.211395 | 0.905123  |
| 29     | 6      | 0    | 1.500202  | -1.873883 | -1.921633 |
| 30     | 1      | 0    | 1.976045  | -2.842786 | -1.803232 |
| 31     | 1      | 0    | 0.790595  | -1.892048 | -2.748964 |
| 32     | 1      | 0    | 2.244638  | -1.104384 | -2.090562 |
| 33     | 6      | 0    | -1.993112 | -0.476660 | -1.011849 |
| 34     | 7      | 0    | -2.412245 | -0.105423 | -2.370601 |
| 35     | 1      | 0    | -3.136042 | -0.740584 | -2.695012 |
| 36     | 6      | 0    | -3.111021 | -0.246509 | 0.005691  |
| 37     | 6      | 0    | -2.862997 | -0.482146 | 1.362861  |
| 38     | 6      | 0    | -4.381224 | 0.184128  | -0.377991 |
| 39     | 6      | 0    | -3.862850 | -0.304861 | 2.313492  |
| 40     | 1      | 0    | -1.875238 | -0.785044 | 1.690486  |
| 41     | 6      | 0    | -5.387186 | 0.362693  | 0.573959  |
| 42     | 1      | 0    | -4.587699 | 0.395311  | -1.418415 |
| 43     | 6      | 0    | -5.133794 | 0.117683  | 1.920504  |
| 44     | 1      | 0    | -3.648991 | -0.489613 | 3.359723  |
| 45     | 1      | 0    | -6.368359 | 0.697597  | 0.257661  |
| 46     | 1      | 0    | -5.914403 | 0.258534  | 2.658774  |
| 47     | 1      | 0    | -1.631721 | -0.206863 | -3.010987 |
| 48     | 1      | 0    | -1.744515 | -1.542038 | -0.957392 |

Imine monocation **7aH<sup>+</sup>**(Transition state-2)

E = -979.090934539

| Center Number | Atomic Number | Atomic Type | Coordinates (Angstroms) |          |           |
|---------------|---------------|-------------|-------------------------|----------|-----------|
|               |               |             | X                       | Y        | Z         |
| 1             | 6             | 0           | 3.795942                | 2.450403 | 0.277816  |
| 2             | 6             | 0           | 2.586995                | 2.923714 | -0.168234 |
| 3             | 6             | 0           | 1.521529                | 2.022992 | -0.409645 |

|    |   |   |           |           |           |
|----|---|---|-----------|-----------|-----------|
| 4  | 6 | 0 | 1.700737  | 0.622787  | -0.175044 |
| 5  | 6 | 0 | 3.020014  | 0.140179  | 0.144091  |
| 6  | 6 | 0 | 4.017709  | 1.066782  | 0.409988  |
| 7  | 1 | 0 | 0.158651  | 3.556561  | -1.081819 |
| 8  | 1 | 0 | 4.609675  | 3.136086  | 0.482651  |
| 9  | 1 | 0 | 2.426429  | 3.982002  | -0.334462 |
| 10 | 6 | 0 | 0.266486  | 2.498985  | -0.872032 |
| 11 | 6 | 0 | 0.542513  | -0.213727 | -0.265745 |
| 12 | 1 | 0 | 5.007543  | 0.722414  | 0.675178  |
| 13 | 6 | 0 | -0.667257 | 0.272678  | -0.762697 |
| 14 | 6 | 0 | -0.786256 | 1.649103  | -1.068411 |
| 15 | 1 | 0 | -1.733165 | 2.019038  | -1.441089 |
| 16 | 7 | 0 | 0.526114  | -1.513121 | 0.313133  |
| 17 | 7 | 0 | 3.264054  | -1.242011 | 0.185164  |
| 18 | 6 | 0 | 4.416228  | -1.703188 | 0.944786  |
| 19 | 1 | 0 | 4.330530  | -2.783523 | 1.077131  |
| 20 | 1 | 0 | 5.374769  | -1.500261 | 0.442880  |
| 21 | 1 | 0 | 4.427984  | -1.234473 | 1.929412  |
| 22 | 6 | 0 | 3.114350  | -1.962747 | -1.081515 |
| 23 | 1 | 0 | 4.037573  | -1.906625 | -1.676551 |
| 24 | 1 | 0 | 2.889073  | -3.013012 | -0.883532 |
| 25 | 1 | 0 | 2.306947  | -1.538940 | -1.674153 |
| 26 | 6 | 0 | -0.322275 | -2.390238 | -0.251216 |
| 27 | 1 | 0 | -0.596249 | -3.255406 | 0.343586  |
| 28 | 1 | 0 | -0.241802 | -2.544945 | -1.324948 |
| 29 | 6 | 0 | 0.798121  | -1.632285 | 1.759487  |
| 30 | 1 | 0 | 1.325175  | -2.565422 | 1.945806  |
| 31 | 1 | 0 | 1.419830  | -0.801950 | 2.074924  |
| 32 | 1 | 0 | -0.141819 | -1.613118 | 2.317553  |
| 33 | 6 | 0 | -1.895320 | -0.577498 | -0.948533 |
| 34 | 7 | 0 | -2.142257 | -0.884673 | -2.284851 |
| 35 | 1 | 0 | -2.849274 | -1.584168 | -2.469702 |
| 36 | 6 | 0 | -3.088762 | -0.196217 | -0.124451 |
| 37 | 6 | 0 | -2.900322 | 0.150487  | 1.219838  |
| 38 | 6 | 0 | -4.381193 | -0.181694 | -0.659602 |
| 39 | 6 | 0 | -3.983544 | 0.500759  | 2.016088  |
| 40 | 1 | 0 | -1.902446 | 0.153511  | 1.641595  |
| 41 | 6 | 0 | -5.466076 | 0.166918  | 0.141132  |
| 42 | 1 | 0 | -4.544957 | -0.413182 | -1.703638 |
| 43 | 6 | 0 | -5.271724 | 0.506224  | 1.478845  |
| 44 | 1 | 0 | -3.824316 | 0.770491  | 3.053006  |
| 45 | 1 | 0 | -6.462121 | 0.182161  | -0.284560 |
| 46 | 1 | 0 | -6.117449 | 0.779484  | 2.098381  |
| 47 | 1 | 0 | -1.329332 | -0.980092 | -2.877981 |
| 48 | 1 | 0 | -1.502556 | -1.671430 | -0.364105 |

Imine monocation **7aH<sup>+</sup>**(Intermediate-2)

E = -979.113231410

| Center<br>Number | Atomic<br>Number | Atomic<br>Type | Coordinates (Angstroms) |          |           |
|------------------|------------------|----------------|-------------------------|----------|-----------|
|                  |                  |                | X                       | Y        | Z         |
| 1                | 6                | 0              | -3.394041               | 2.784513 | -0.683836 |
| 2                | 6                | 0              | -2.155910               | 3.132995 | -0.204955 |
| 3                | 6                | 0              | -1.224646               | 2.132608 | 0.165175  |
| 4                | 6                | 0              | -1.571719               | 0.751649 | 0.033568  |
| 5                | 6                | 0              | -2.911035               | 0.421958 | -0.354619 |
| 6                | 6                | 0              | -3.775097               | 1.429689 | -0.738033 |
| 7                | 1                | 0              | 0.298881                | 3.532373 | 0.778576  |
| 8                | 1                | 0              | -4.101078               | 3.548152 | -0.984622 |

|    |   |   |           |           |           |
|----|---|---|-----------|-----------|-----------|
| 9  | 1 | 0 | -1.866691 | 4.172810  | -0.110835 |
| 10 | 6 | 0 | 0.060456  | 2.482562  | 0.653729  |
| 11 | 6 | 0 | -0.540895 | -0.208562 | 0.296580  |
| 12 | 1 | 0 | -4.778926 | 1.176319  | -1.052498 |
| 13 | 6 | 0 | 0.720473  | 0.149829  | 0.737674  |
| 14 | 6 | 0 | 0.987286  | 1.525738  | 0.952491  |
| 15 | 1 | 0 | 1.965827  | 1.805504  | 1.318270  |
| 16 | 7 | 0 | -0.785587 | -1.609908 | -0.024503 |
| 17 | 7 | 0 | -3.310684 | -0.938539 | -0.318637 |
| 18 | 6 | 0 | -4.276837 | -1.375407 | -1.320826 |
| 19 | 1 | 0 | -4.294536 | -2.467404 | -1.331991 |
| 20 | 1 | 0 | -5.298713 | -1.024600 | -1.117253 |
| 21 | 1 | 0 | -3.973442 | -1.021557 | -2.306345 |
| 22 | 6 | 0 | -3.636477 | -1.427968 | 1.019005  |
| 23 | 1 | 0 | -4.653843 | -1.141528 | 1.320859  |
| 24 | 1 | 0 | -3.569056 | -2.520770 | 1.037272  |
| 25 | 1 | 0 | -2.946426 | -1.014917 | 1.754477  |
| 26 | 6 | 0 | -0.789325 | -2.513879 | 0.880179  |
| 27 | 1 | 0 | -0.873881 | -3.554303 | 0.594590  |
| 28 | 1 | 0 | -0.717107 | -2.233026 | 1.921222  |
| 29 | 6 | 0 | -0.821799 | -1.966198 | -1.462420 |
| 30 | 1 | 0 | -1.403755 | -2.874026 | -1.592335 |
| 31 | 1 | 0 | -1.267461 | -1.145685 | -2.012605 |
| 32 | 1 | 0 | 0.205962  | -2.119209 | -1.793876 |
| 33 | 6 | 0 | 1.867659  | -0.827611 | 0.981499  |
| 34 | 7 | 0 | 2.146342  | -0.856076 | 2.423545  |
| 35 | 1 | 0 | 2.840592  | -1.569303 | 2.628486  |
| 36 | 6 | 0 | 3.102247  | -0.404541 | 0.189676  |
| 37 | 6 | 0 | 3.126696  | -0.610891 | -1.193101 |
| 38 | 6 | 0 | 4.200408  | 0.202322  | 0.800580  |
| 39 | 6 | 0 | 4.222248  | -0.213536 | -1.953419 |
| 40 | 1 | 0 | 2.282967  | -1.082603 | -1.683883 |
| 41 | 6 | 0 | 5.302230  | 0.598539  | 0.040984  |
| 42 | 1 | 0 | 4.189650  | 0.367404  | 1.869896  |
| 43 | 6 | 0 | 5.316763  | 0.394691  | -1.336633 |
| 44 | 1 | 0 | 4.224093  | -0.381009 | -3.024167 |
| 45 | 1 | 0 | 6.148695  | 1.067370  | 0.529554  |
| 46 | 1 | 0 | 6.172454  | 0.702920  | -1.925831 |
| 47 | 1 | 0 | 1.309291  | -1.095957 | 2.944090  |
| 48 | 1 | 0 | 1.589422  | -1.814463 | 0.598548  |

## References

- [1] A. S. Antonov, V. Y. Mikshiev, A. F. Pozharskii, V. A. Ozeryanskii, *Synth.* **2014**, *46*, 3273–3282.
- [2] H. Ott, M. Denzer, *J. Org. Chem.* **2002**, *33*, 4263–4266.
- [3] H. Quast, S. Ivanova, E.-M. Peters, K. Peters, *European J. Org. Chem.* **2000**, *2000*, 1577–1587.
- [4] K. Mori, Y. Ohshima, K. Ehara, T. Akiyama, *Chem. Lett.* **2009**, *38*, 524–525.
- [5] C. Zhang, S. Murarka, D. Seidel, *J. Org. Chem.* **2008**, *74*, 419–422.
- [6] Y.-B. Shen, L.-X. Wang, Y.-M. Sun, F.-Y. Dong, L. Yu, Q. Liu, J. Xiao, *J. Org. Chem.* **2019**, *85*, 1915–1926.
- [7] Y.-P. He, Y.-L. Du, S.-W. Luo, L.-Z. Gong, N. B. Ar, -h N N Co, N. N. Co, -h -b, **2011**, DOI 10.1016/j.tetlet.2011.10.062.
- [8] H. Shi, L. Xu, D. Ren, L. Wang, W. Guo, S.-S. Li, *Org. Biomol. Chem.* **2020**, *18*, 895–904.
- [9] G. M. Sheldrick, *Acta Crystallogr. Sect. A Found. Crystallogr.* **2015**, *71*, 3–8.
- [10] G. M. Sheldrick, *Acta Crystallogr. Sect. C Struct. Chem.* **2015**, *71*, 3–8.
- [11] O. V. Dolomanov, L. J. Bourhis, R. J. Gildea, J. A. K. Howard, H. Puschmann, *J. Appl. Crystallogr.* **2009**, *42*, 339–341.
- [12] M. J. Frisch, G. W. Trucks, G. E. Schlegel, **2010**.
- [13] X. Li, M. J. Frisch, *J. Chem. Theory Comput.* **2006**, *2*, 835–839.
- [14] J. Tomasi, B. Mennucci, R. Cammi, *Chem. Rev.* **2005**, *105*, 2999–3093.
